# Supplementary material for: The B(C6F5)3·H2O promoted synthesis of fluoroalkylated 3,3′,3′′-trisindolylmethanes from fluorocarboxylic acids and indoles
Source: Royal Society of Chemistry journal article supplement (doi:10.1039/d2ob02241a), 2023-01-01

## Supplementary Information

### The $B(C_6F_5)_3 \cdot H_2O$ Promoted Synthesis of Fluoroalkylated 3,3',3''-Trisindolylmethanes from Fluorocarboxylic Acids and Indoles

Xin Xu<sup>a</sup>, Dandan Gao<sup>a</sup>, Jiahua Wang<sup>a</sup>, Xiang-Ying Tang<sup>a, \*</sup>, Long Wang<sup>a, \*</sup>

<sup>a</sup> Key Laboratory of Material Chemistry for Energy Conversion and Storage, Ministry of Education; Hubei Key Laboratory of Bio-inorganic Chemistry & Materia Medica; School of Chemistry and Chemical Engineering, Huazhong University of Science and Technology, Wuhan 430074, China.

\* Corresponding authors:

Xiang-Ying Tang, Email: [xytang@hust.edu.cn](mailto:xytang@hust.edu.cn);

Long Wang, Email: [wanglo@hust.edu.cn](mailto:wanglo@hust.edu.cn).

## Table of Contents

|                                                                            |    |
|----------------------------------------------------------------------------|----|
| 1. Control experiments                                                     | S3 |
| 2. X-ray crystal structure and crystallographic data of compound <b>2a</b> | S4 |
| 3. X-ray crystal structure and crystallographic data of compound <b>4</b>  | S5 |
| 4. NMR spectra of synthesized compounds                                    | S6 |

## 1. Control experiments

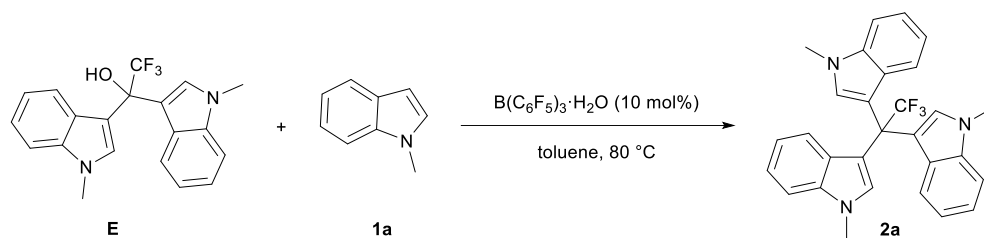

Compound **E** (prepared according to X.-T. Wu, F. Ma, E.-K. Xiao, J. Yin, F. Sun, Q. Wang, Y.-J. Jiang and P. Chen, *Org. Biomol. Chem.*, 2022, **20**, 7491–7498.) (36 mg, 0.1 mmol, 1.0 equiv), *N*-methyl indole **1a** (13 mg, 0.1 mmol, 1.0 equiv),  $B(C_6F_5)_3 \cdot H_2O$  (5 mg, 0.01 mmol, 0.1 equiv, 10 mol%), and toluene (1.0 mL) were mixed in a 5-mL vial equipped with a stir bar. The resulting mixture was stirred at  $80\text{ }^\circ\text{C}$  (heating mantle). The reaction was monitored by TLC. The compound **E** mainly converted to the product **2a** in 8 hours.

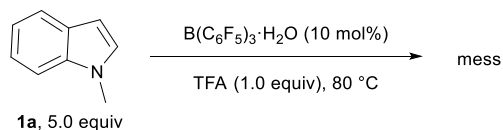

Solvent-free reaction: *N*-methyl indole **1a** (131 mg, 1.0 mmol, 5.0 equiv), trifluoroacetic acid (23 mg, TFA, 0.2 mmol, 1.0 equiv), and  $B(C_6F_5)_3 \cdot H_2O$  (10 mg, 0.02 mmol, 0.1 equiv, 10 mol%) were mixed in a 5-mL vial equipped with a stir bar. The resulting mixture was stirred at  $80\text{ }^\circ\text{C}$  (heating mantle) for 36 h. The reaction was monitored by TLC, and a messy mixture was obtained.

## 2. X-ray crystal structure and crystallographic data of compound 2a

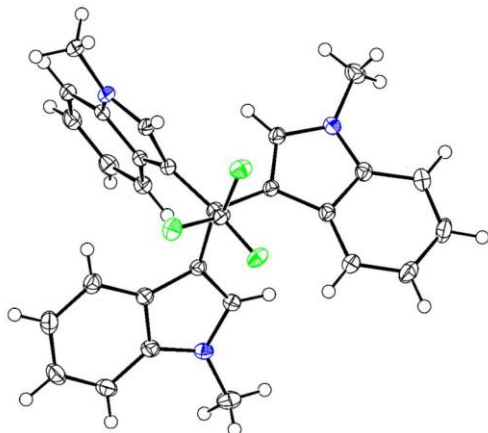

Thermal ellipsoids are at the 50% probability level. (CCDC 2121801) Crystals suitable for X-ray analysis were obtained by the diffusion of hexane to the dichloromethane solution of compound **2a**. Clear colourless bulk; XtaLAB PRO MM007HF Cu; Rigaku, Japan.

Bond precision: C-C = 0.0017 Å Wavelength=1.54184

Cell: a=8.86737(3) b=15.02535(6) c=17.36072(7)  
 alpha=90 beta=91.6634(3) gamma=90

Temperature: 100 K

|                                     | Calculated                                                    | Reported                                                      |
|-------------------------------------|---------------------------------------------------------------|---------------------------------------------------------------|
| Volume                              | 2312.087(15)                                                  | 2312.087(16)                                                  |
| Space group                         | P 21/n                                                        | P 1 21/n 1                                                    |
| Hall group                          | -P 2yn                                                        | -P 2yn                                                        |
| Moiety formula                      | C <sub>29</sub> H <sub>24</sub> F <sub>3</sub> N <sub>3</sub> | C <sub>29</sub> H <sub>24</sub> F <sub>3</sub> N <sub>3</sub> |
| Sum formula                         | C <sub>29</sub> H <sub>24</sub> F <sub>3</sub> N <sub>3</sub> | C <sub>29</sub> H <sub>24</sub> F <sub>3</sub> N <sub>3</sub> |
| Mr                                  | 471.51                                                        | 471.51                                                        |
| D <sub>x</sub> , g cm <sup>-3</sup> | 1.355                                                         | 1.355                                                         |
| Z                                   | 4                                                             | 4                                                             |
| Mu (mm <sup>-1</sup> )              | 0.802                                                         | 0.802                                                         |
| F <sub>000</sub>                    | 984.0                                                         | 984.0                                                         |
| F <sub>000</sub> '                  | 987.18                                                        |                                                               |
| h,k,l <sub>max</sub>                | 11,18,21                                                      | 11,18,21                                                      |
| N <sub>ref</sub>                    | 4690                                                          | 4647                                                          |
| T <sub>min</sub> ,T <sub>max</sub>  | 0.786,0.852                                                   | 0.771,1.000                                                   |
| T <sub>min</sub> '                  | 0.755                                                         |                                                               |
| R(reflections)= 0.0377( 4570)       |                                                               | wR2(reflections)= 0.0928( 4647)                               |
| S = 1.073                           | N <sub>par</sub> = 319                                        |                                                               |

### 3. X-ray crystal structure and crystallographic data of compound 4

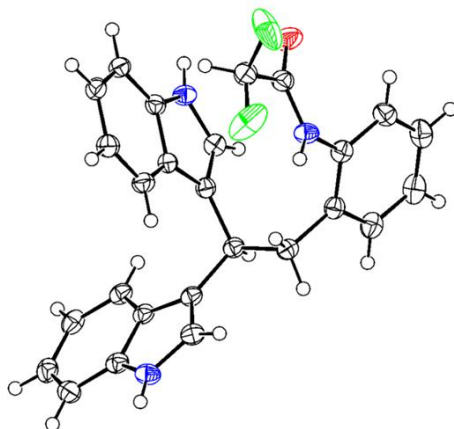

Thermal ellipsoids are at the 50% probability level. (CCDC 2213382) Crystals suitable for X-ray analysis were obtained by the diffusion of hexane to the dichloromethane solution of compound 4. Clear colourless bulk; XtaLAB PRO MM007HF Cu; Rigaku, Japan.

Bond precision: C-C = 0.0018 Å Wavelength=1.54184

Cell: a=9.3177(1) b=11.8518(1) c=19.9301(2)  
 alpha=96.903(1) beta=93.425(1) gamma=106.005(1)

Temperature: 100 K

|                                     | Calculated                                                      | Reported                                                        |
|-------------------------------------|-----------------------------------------------------------------|-----------------------------------------------------------------|
| Volume                              | 2090.29(4)                                                      | 2090.29(4)                                                      |
| Space group                         | P -1                                                            | P -1                                                            |
| Hall group                          | -P 1                                                            | -P 1                                                            |
| Moiety formula                      | C <sub>26</sub> H <sub>21</sub> F <sub>2</sub> N <sub>3</sub> O | C <sub>26</sub> H <sub>21</sub> F <sub>2</sub> N <sub>3</sub> O |
| Sum formula                         | C <sub>26</sub> H <sub>21</sub> F <sub>2</sub> N <sub>3</sub> O | C <sub>26</sub> H <sub>21</sub> F <sub>2</sub> N <sub>3</sub> O |
| Mr                                  | 429.46                                                          | 429.46                                                          |
| D <sub>x</sub> , g cm <sup>-3</sup> | 1.365                                                           | 1.365                                                           |
| Z                                   | 4                                                               | 4                                                               |
| Mu (mm <sup>-1</sup> )              | 0.798                                                           | 0.798                                                           |
| F <sub>000</sub>                    | 896.0                                                           | 896.0                                                           |
| F <sub>000</sub> '                  | 898.88                                                          |                                                                 |
| h,k,l <sub>max</sub>                | 11,14,24                                                        | 11,14,24                                                        |
| N <sub>ref</sub>                    | 8492                                                            | 8275                                                            |
| T <sub>min</sub> , T <sub>max</sub> | 0.839, 0.923                                                    | 0.756, 1.000                                                    |
| T <sub>min</sub> '                  | 0.839                                                           |                                                                 |
| R(reflections)= 0.0376( 7882)       |                                                                 | wR <sub>2</sub> (reflections)= 0.0918( 8275)                    |
| S = 1.009                           | N <sub>par</sub> = 578                                          |                                                                 |

#### 4. NMR Spectra of all compounds

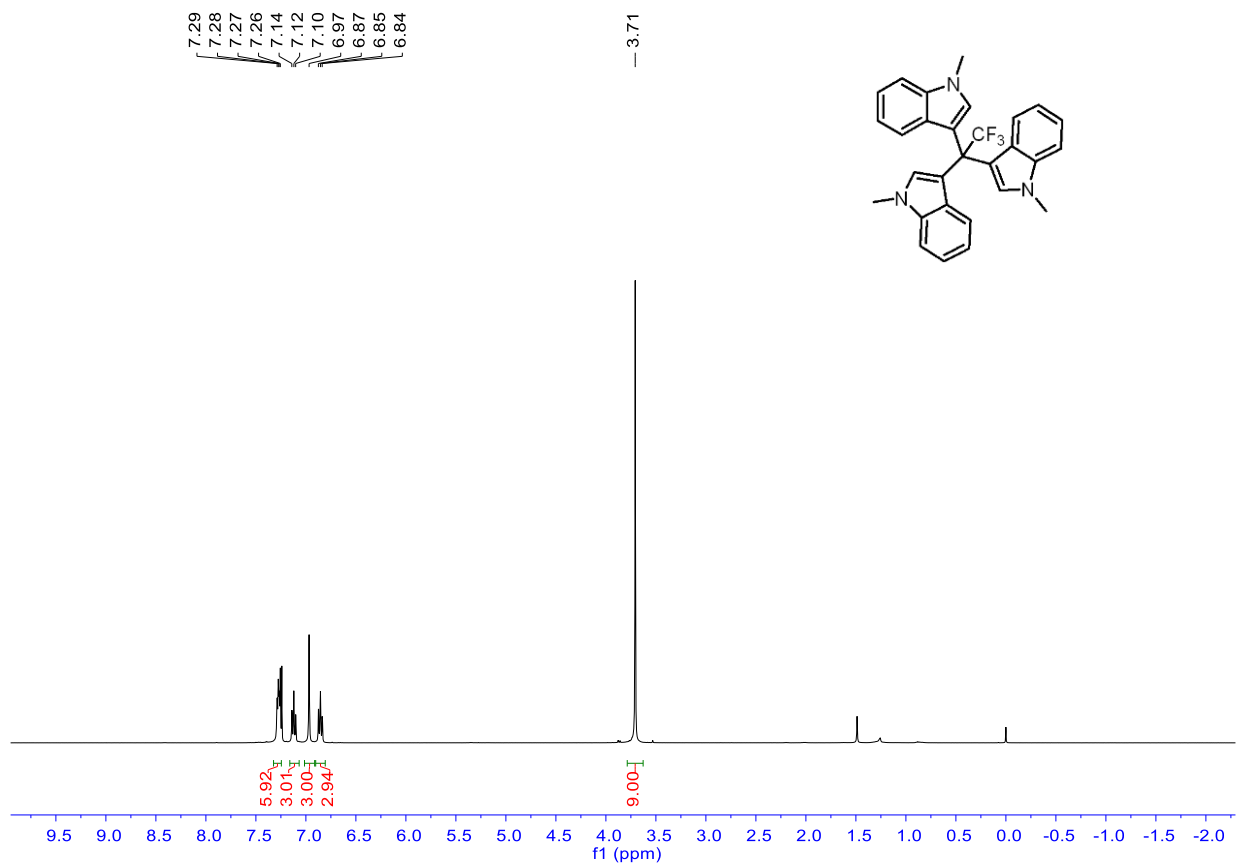

$^1\text{H}$  NMR spectrum of **2a**

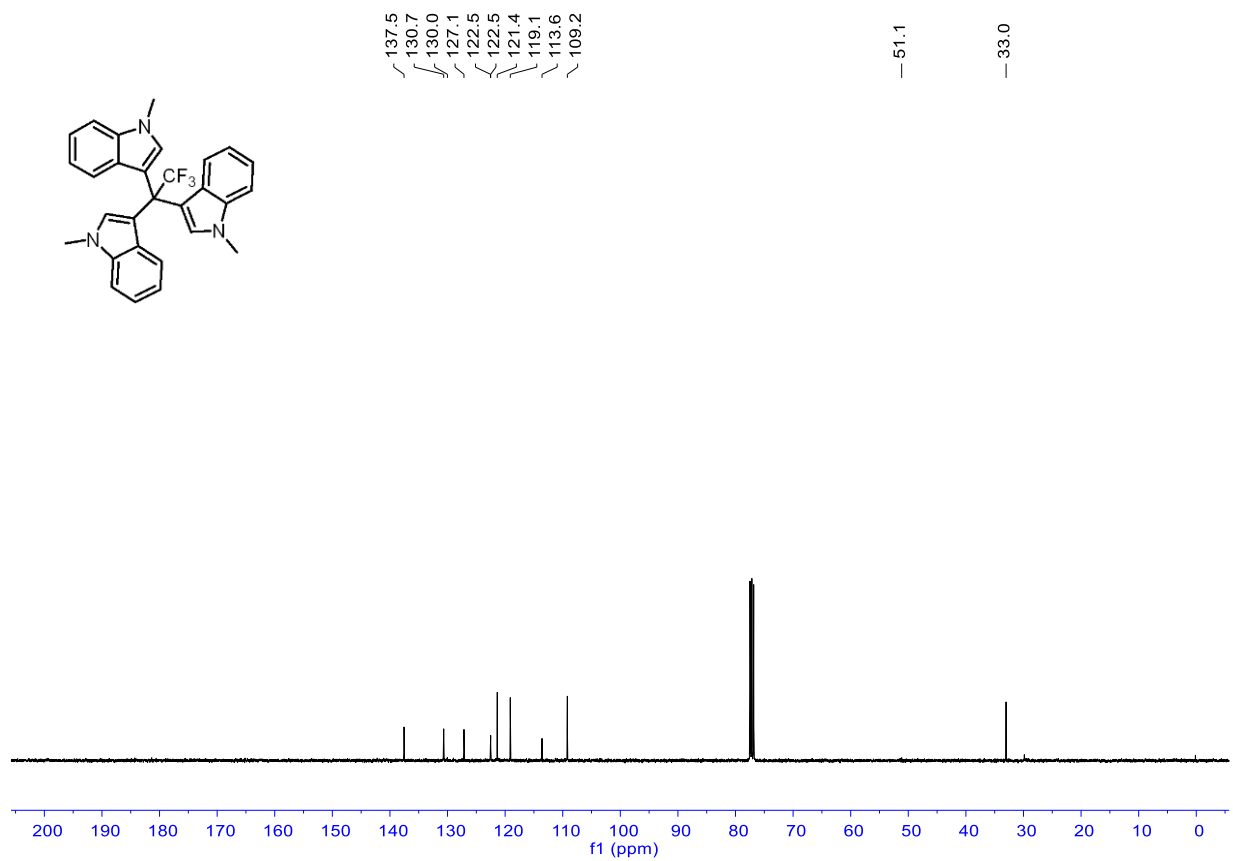

$^{13}\text{C}\{^1\text{H}\}$  NMR spectrum of **2a**

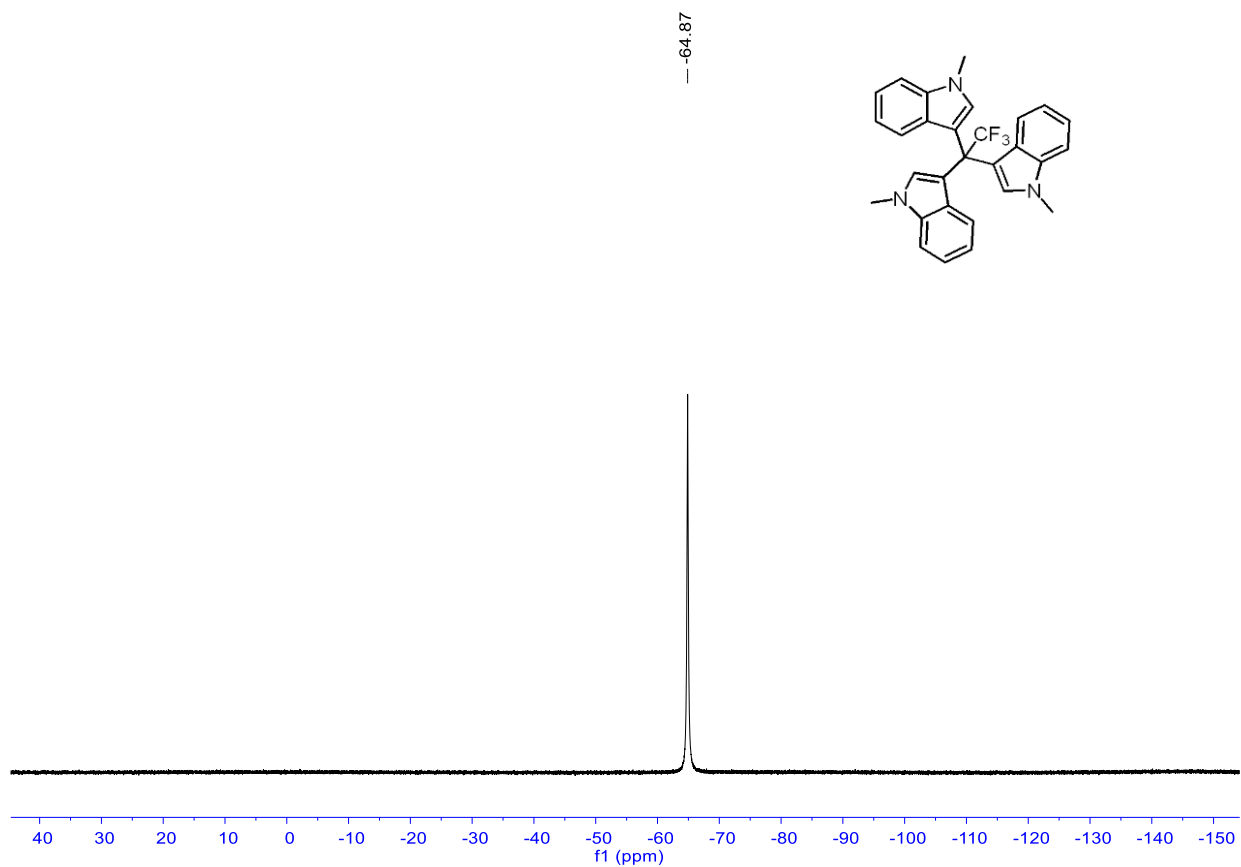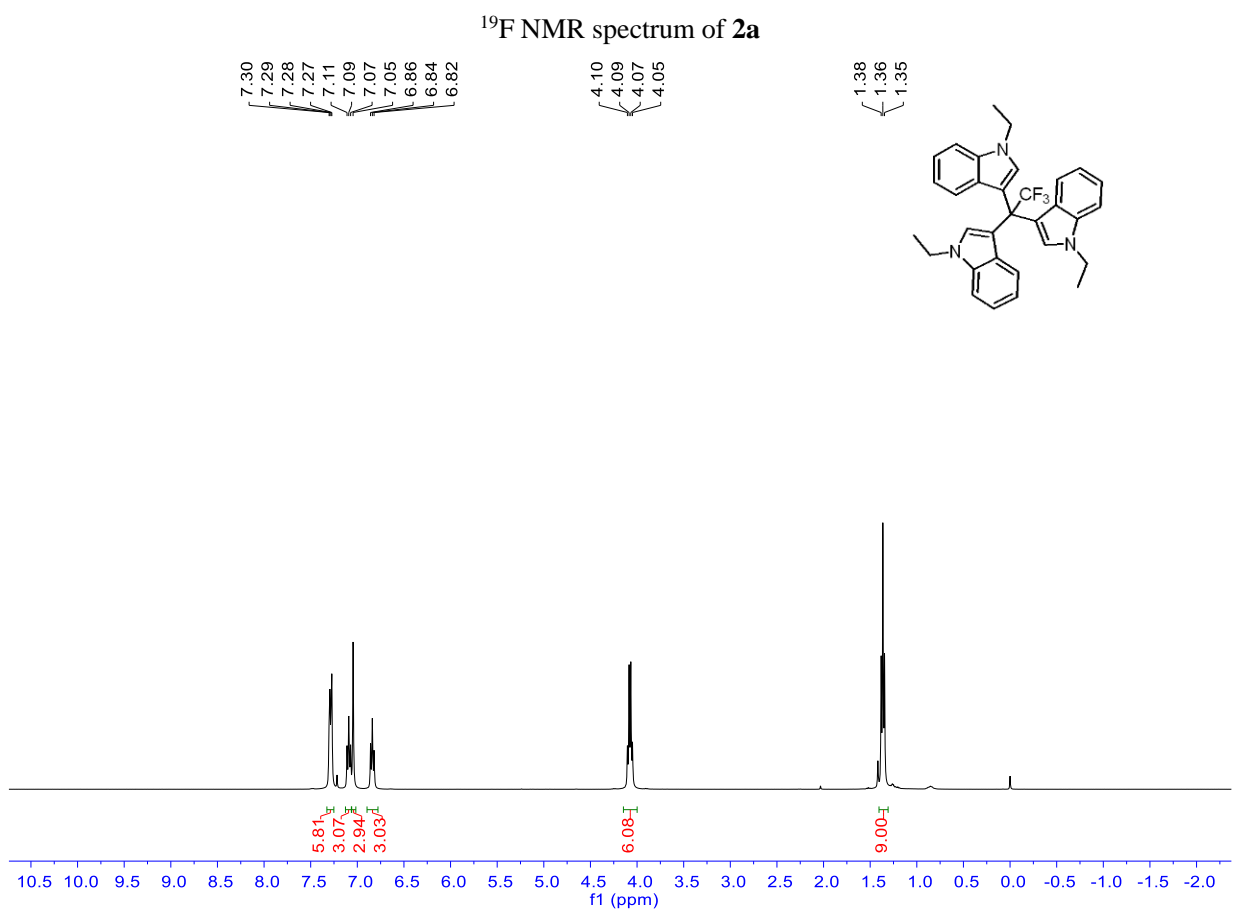

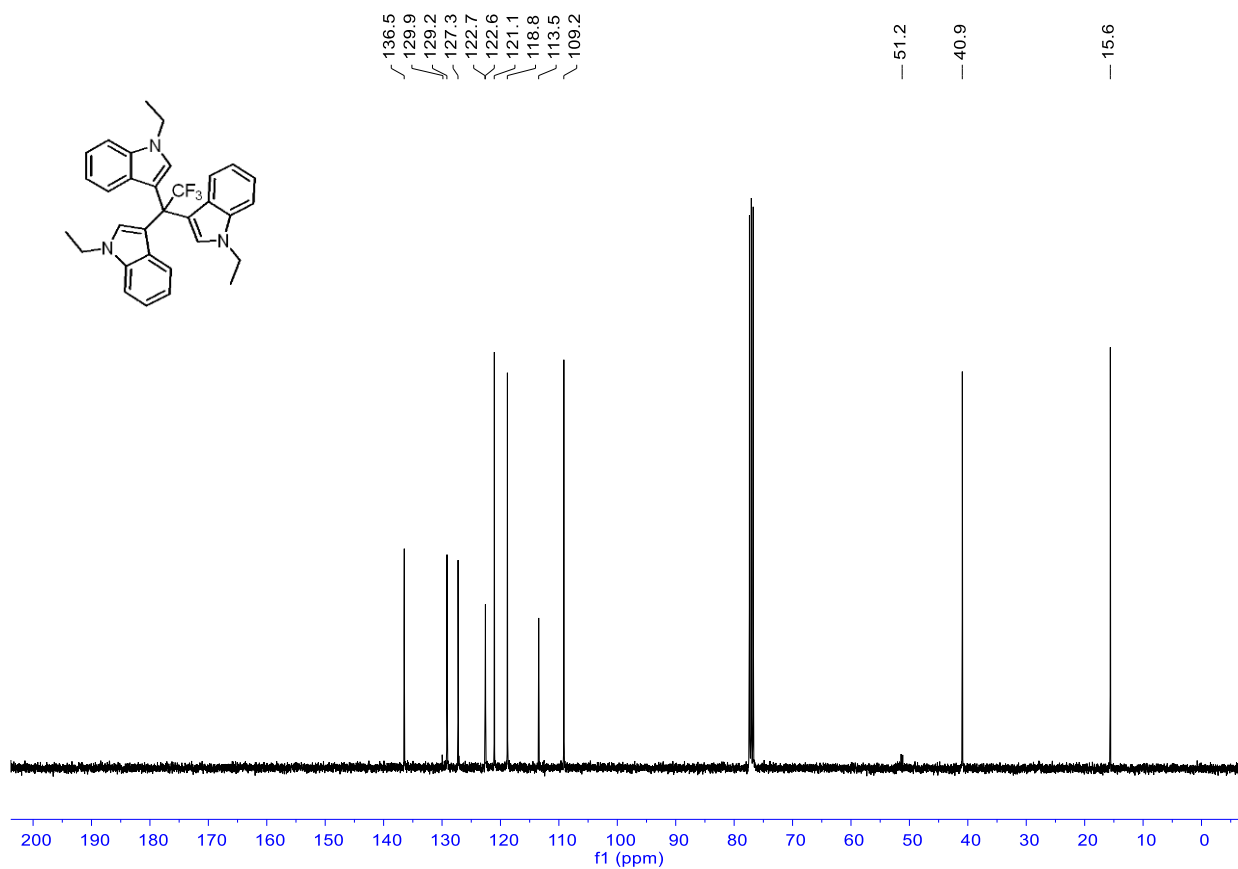

$^{13}\text{C}\{^1\text{H}\}$  NMR spectrum of **2b**

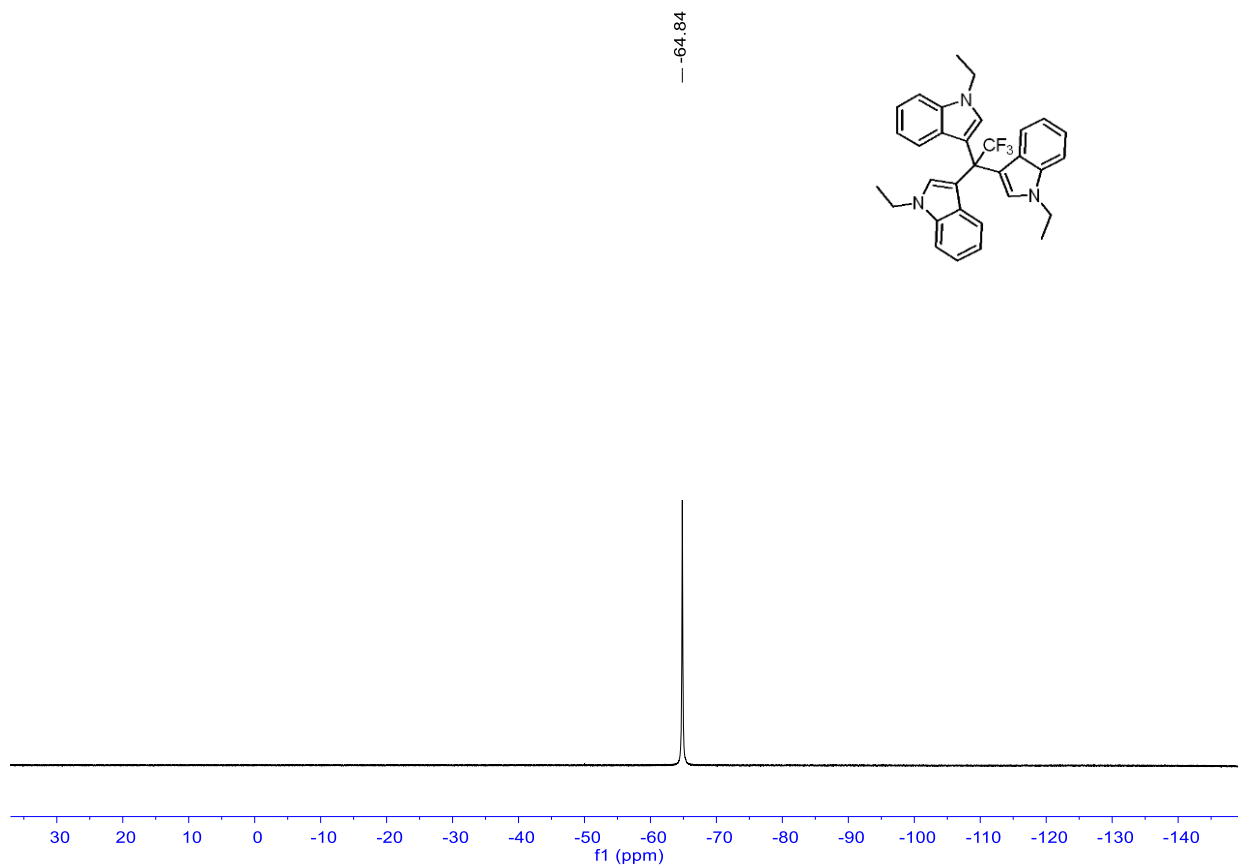

$^{19}\text{F}$  NMR spectrum of **2b**



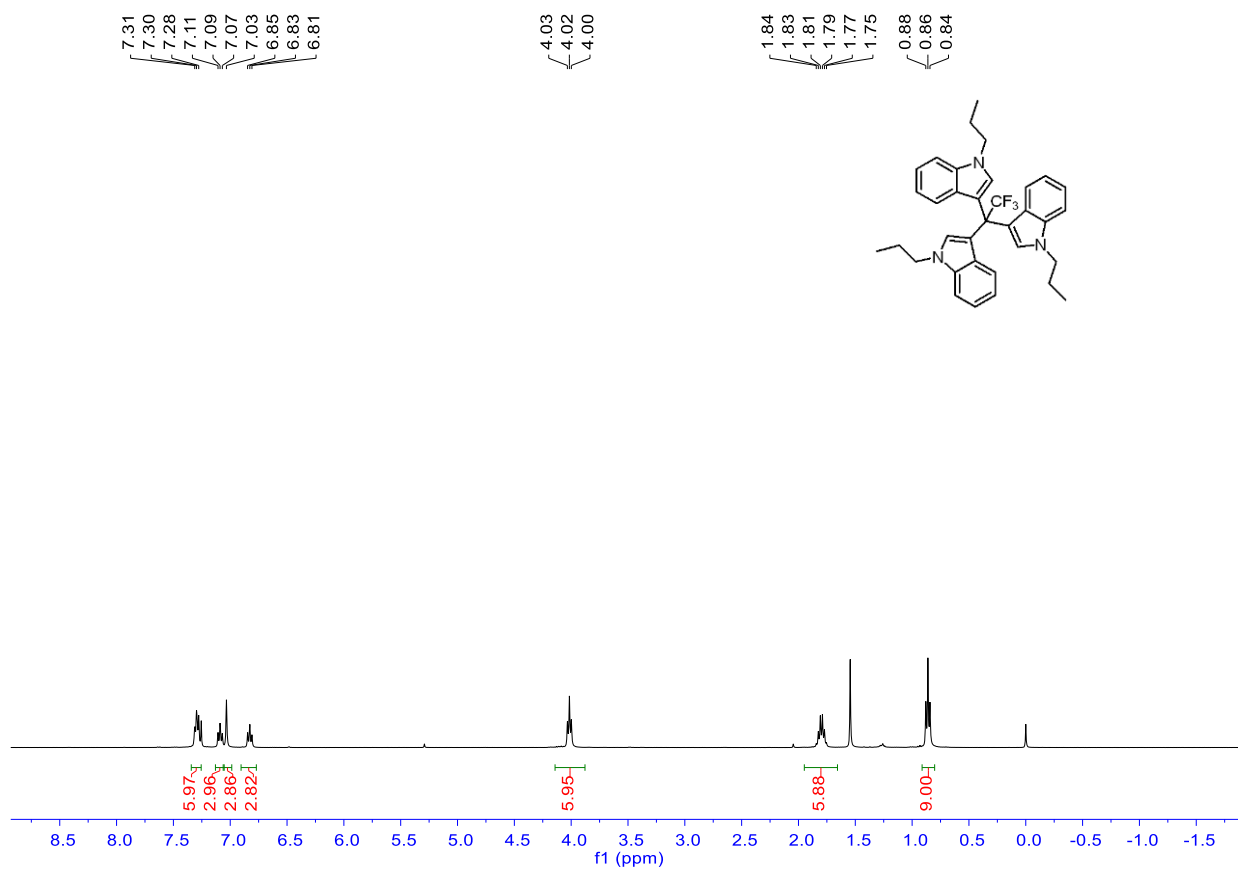

$^1\text{H}$  NMR spectrum of **2c**

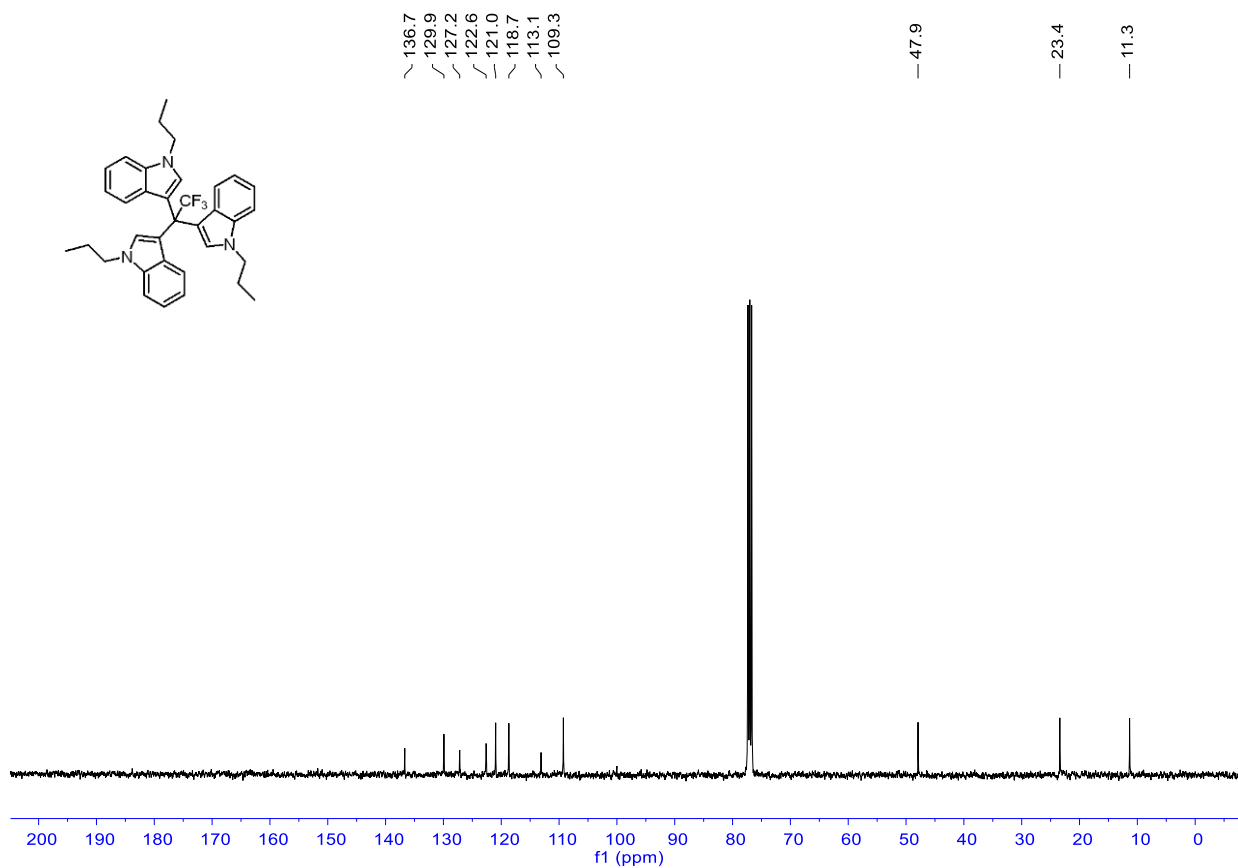

$^{13}\text{C}\{^1\text{H}\}$  NMR spectrum of **2c**

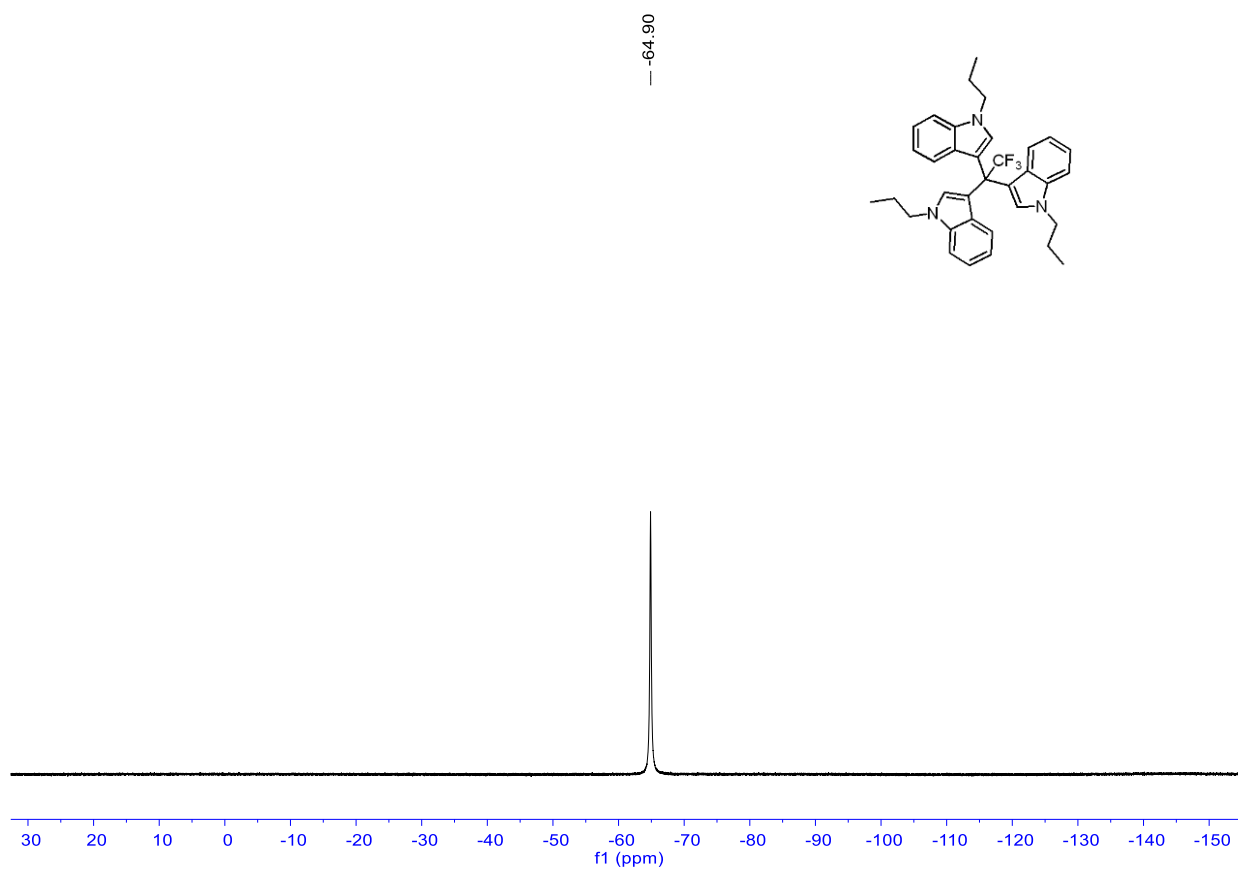

<sup>19</sup>F NMR spectrum of **2c**

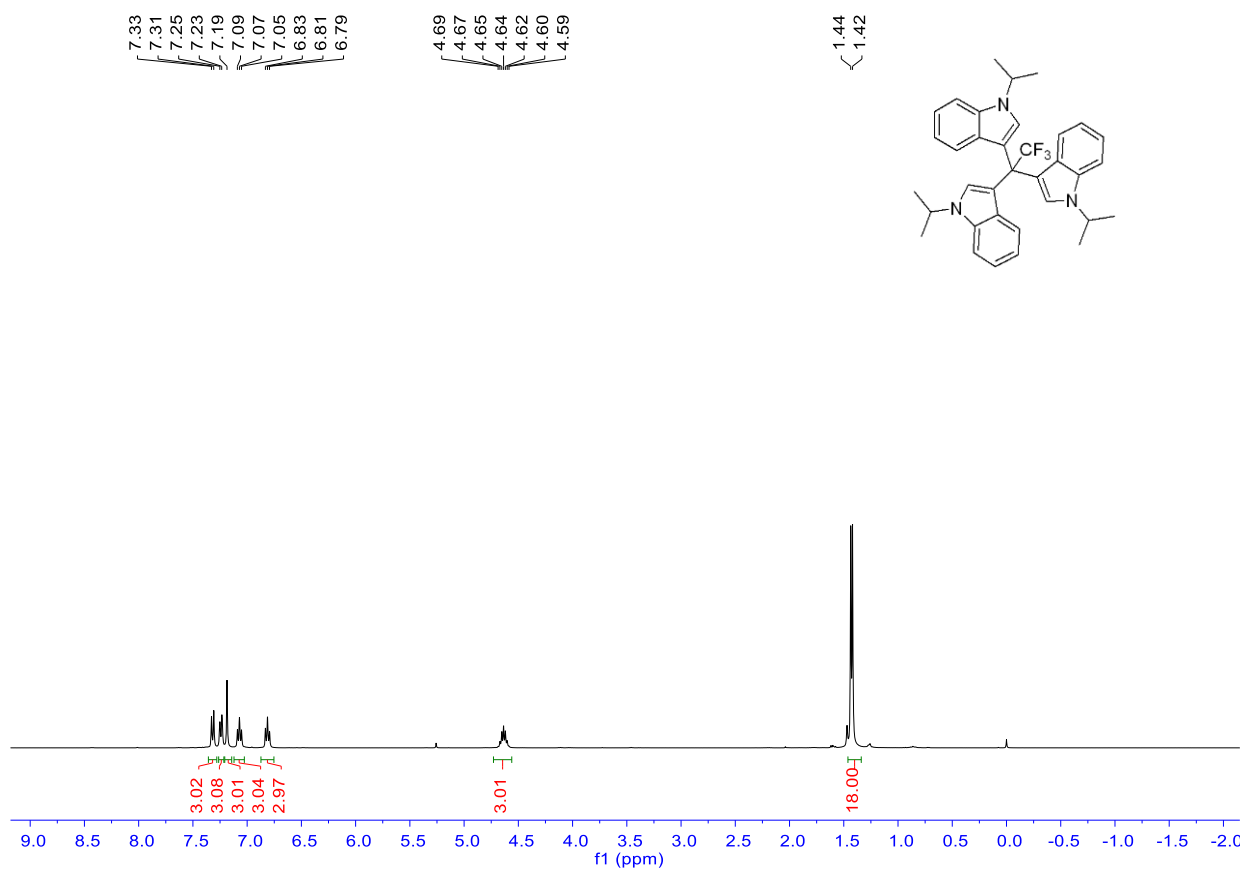

<sup>1</sup>H NMR spectrum of **2d**

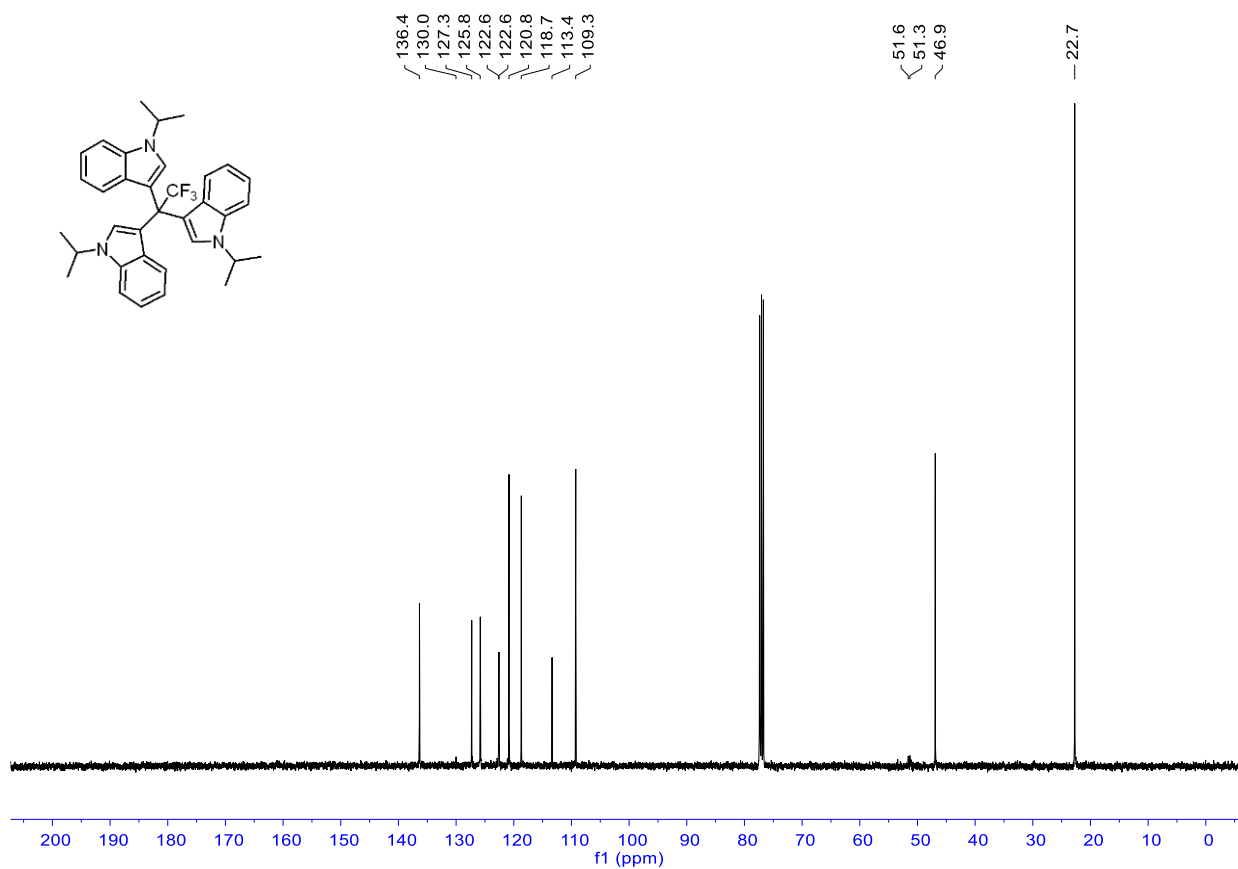

$^{13}\text{C}\{^1\text{H}\}$  NMR spectrum of **2d**

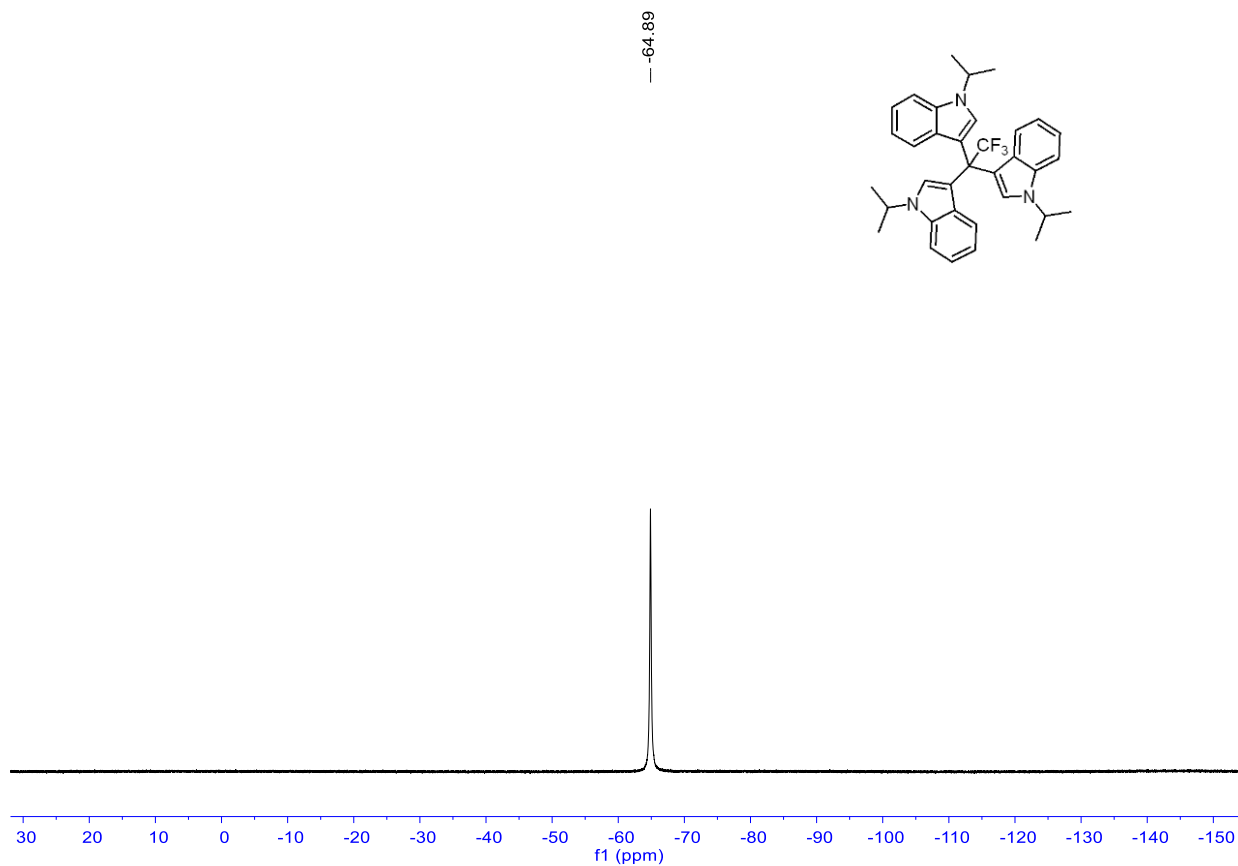

$^{19}\text{F}$  NMR spectrum of **2d**

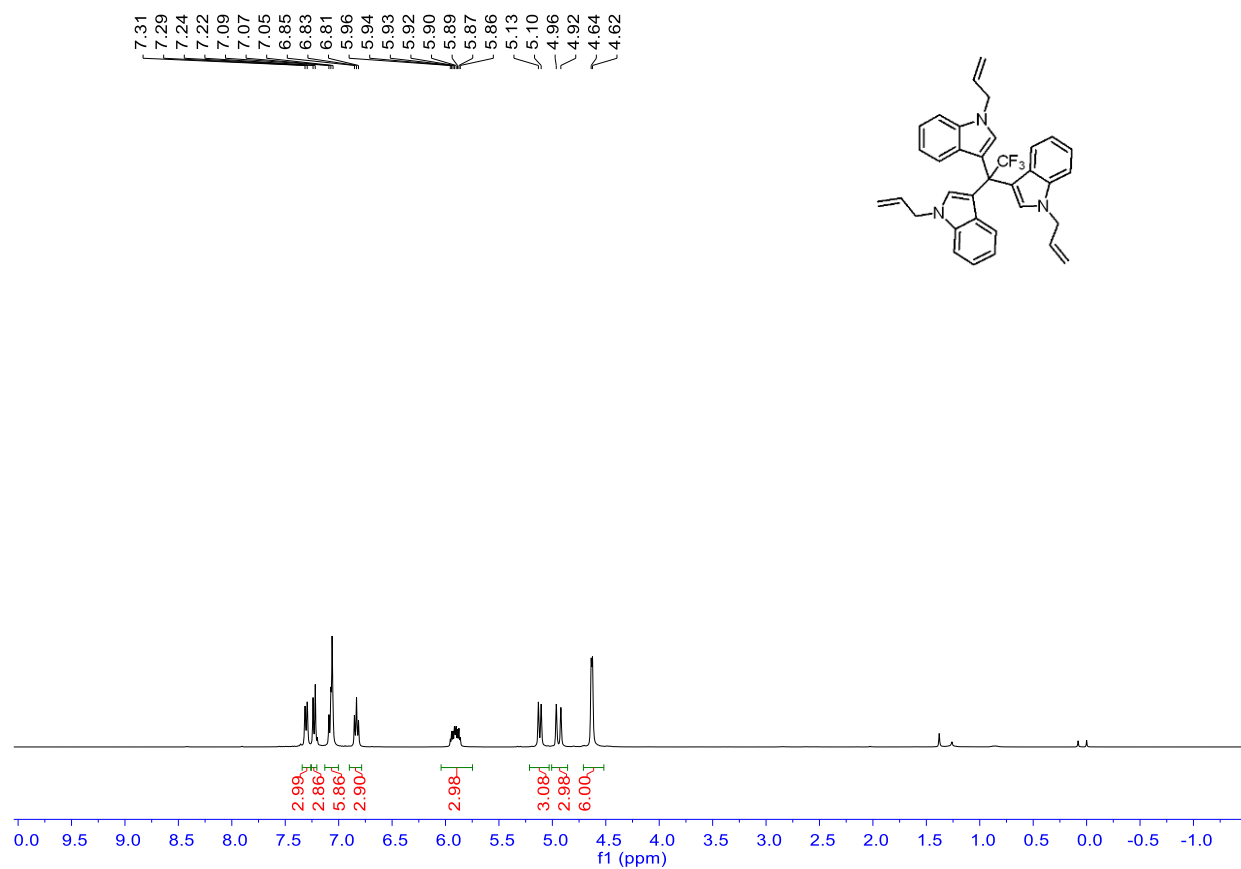

<sup>1</sup>H NMR spectrum of **2e**

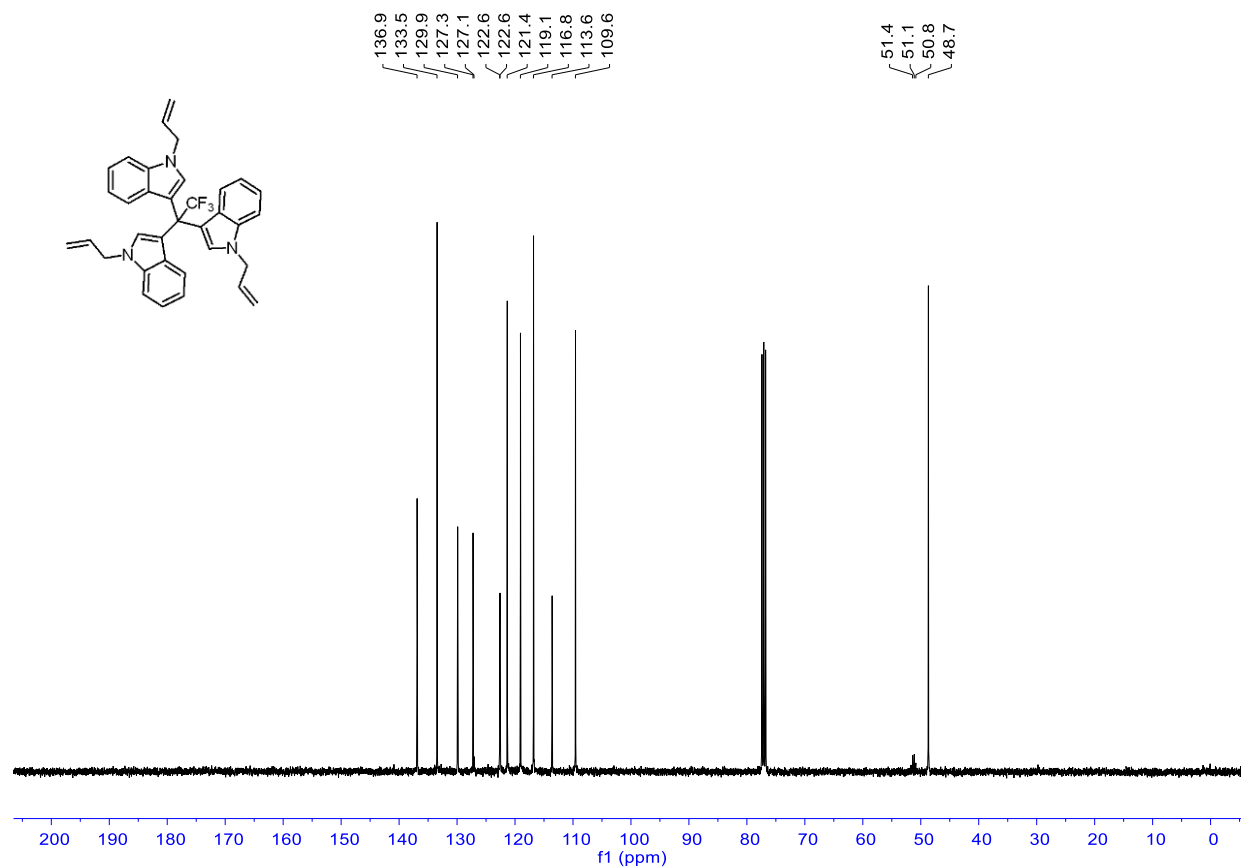

<sup>13</sup>C{<sup>1</sup>H} NMR spectrum of **2e**

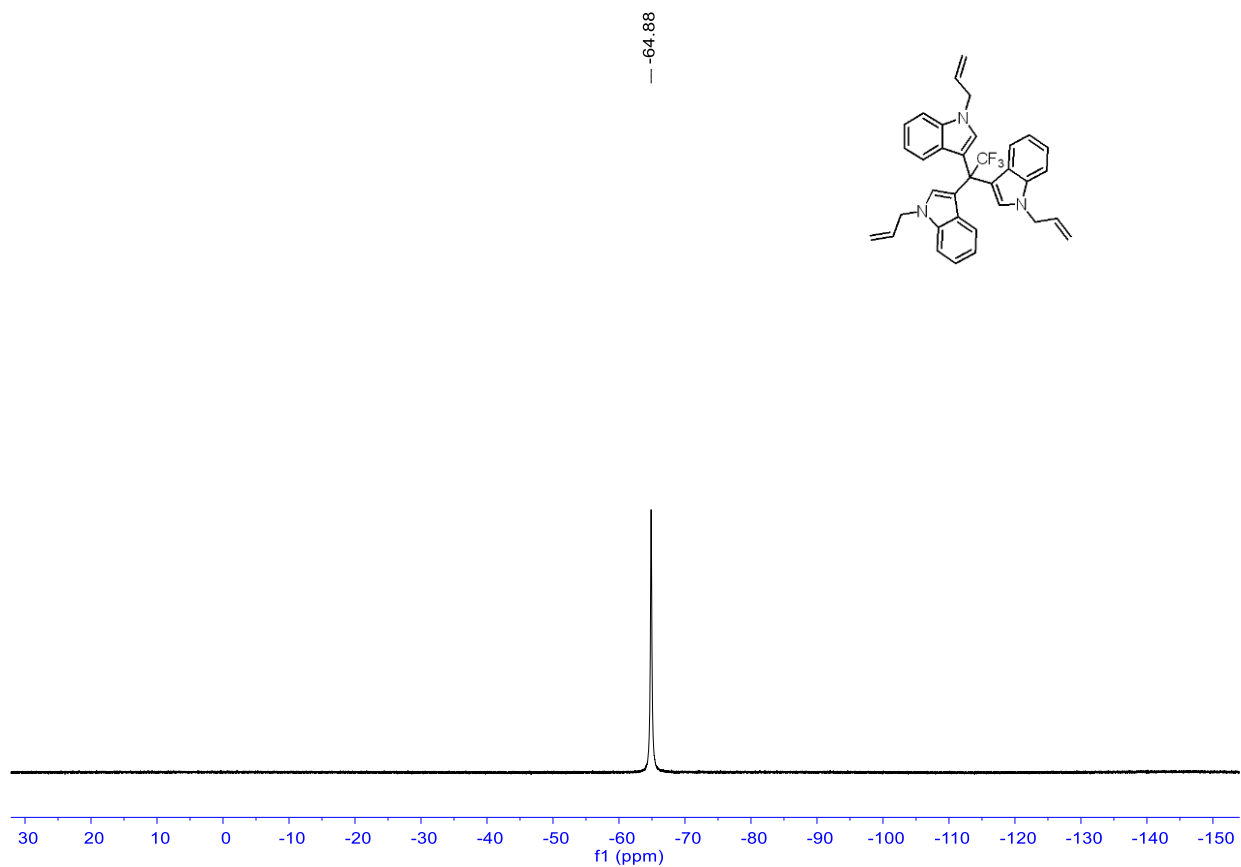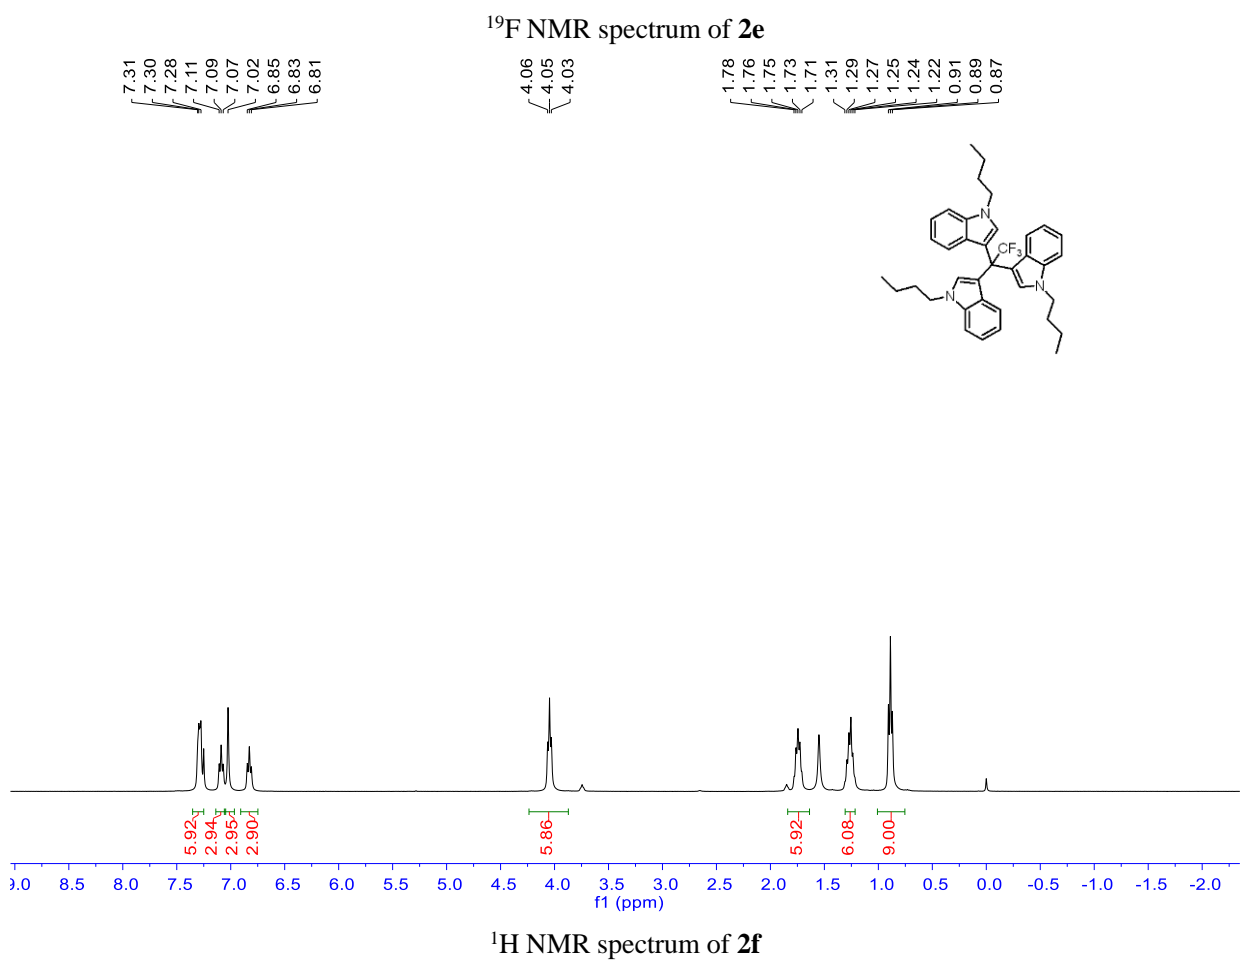

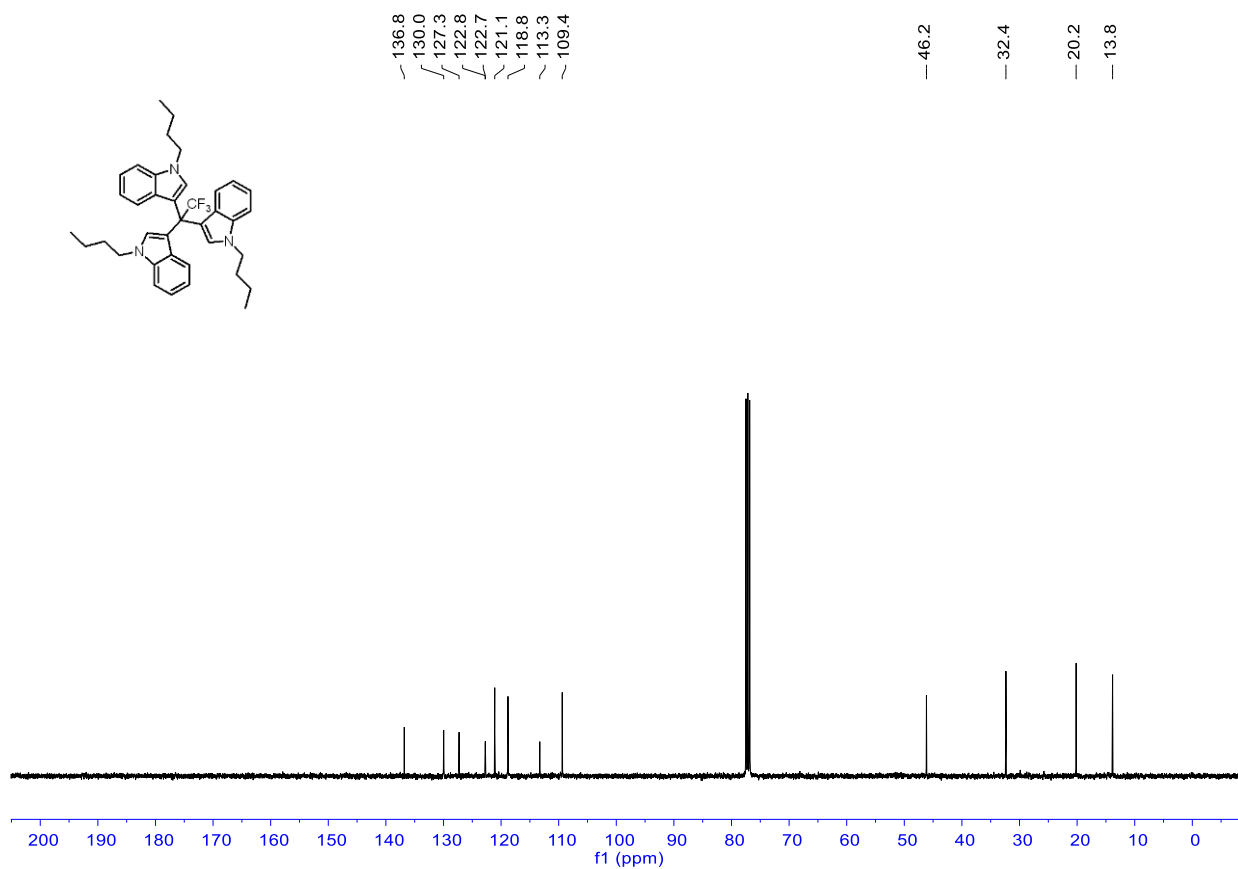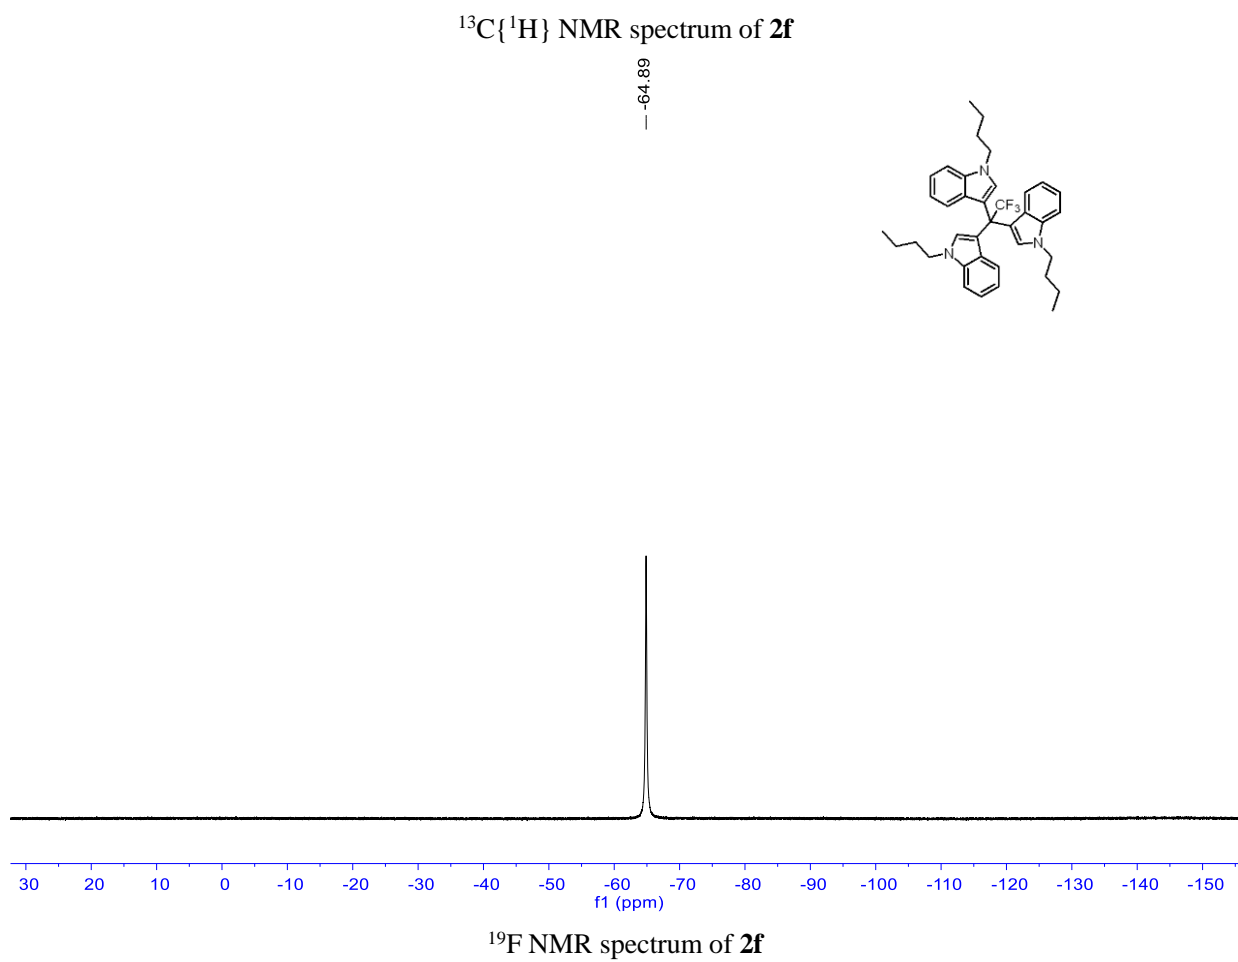

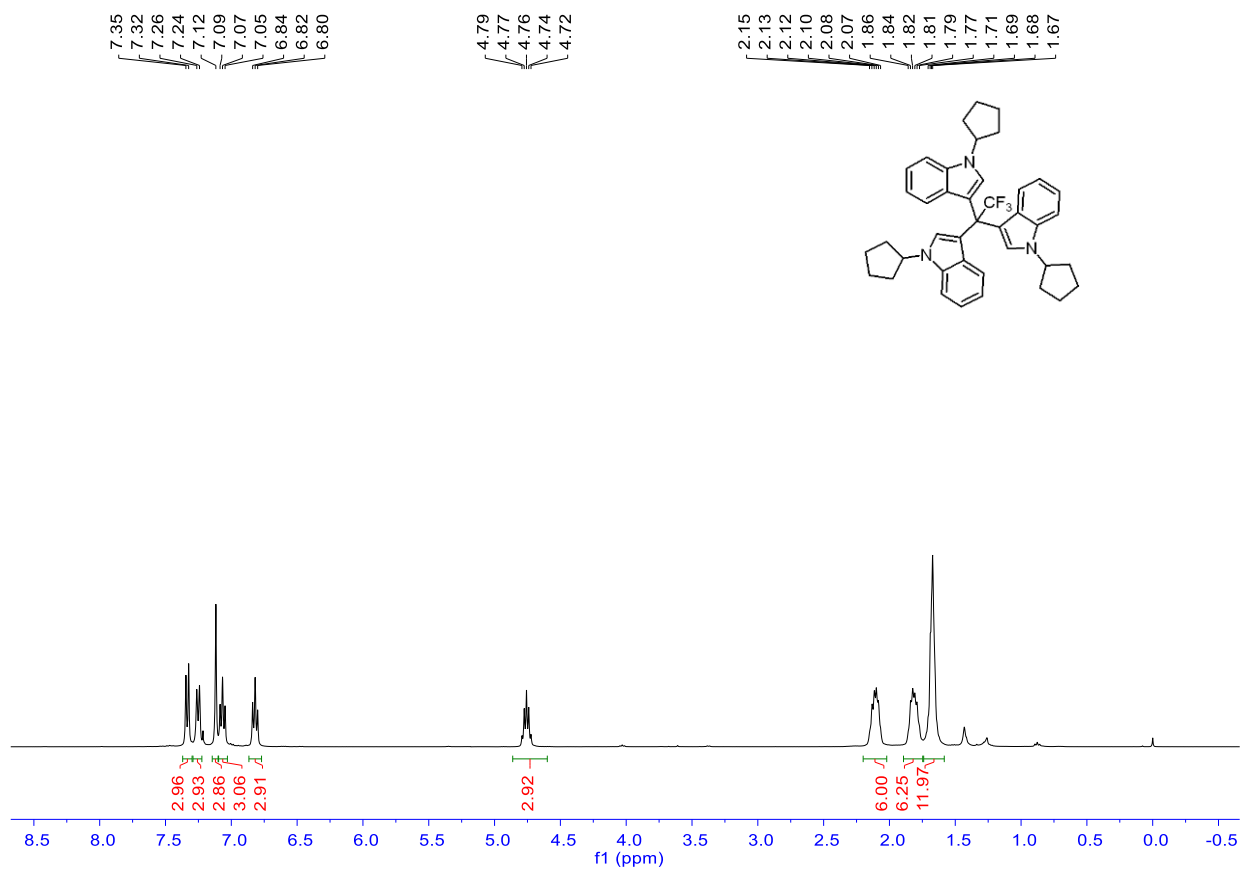

<sup>1</sup>H NMR spectrum of **2g**

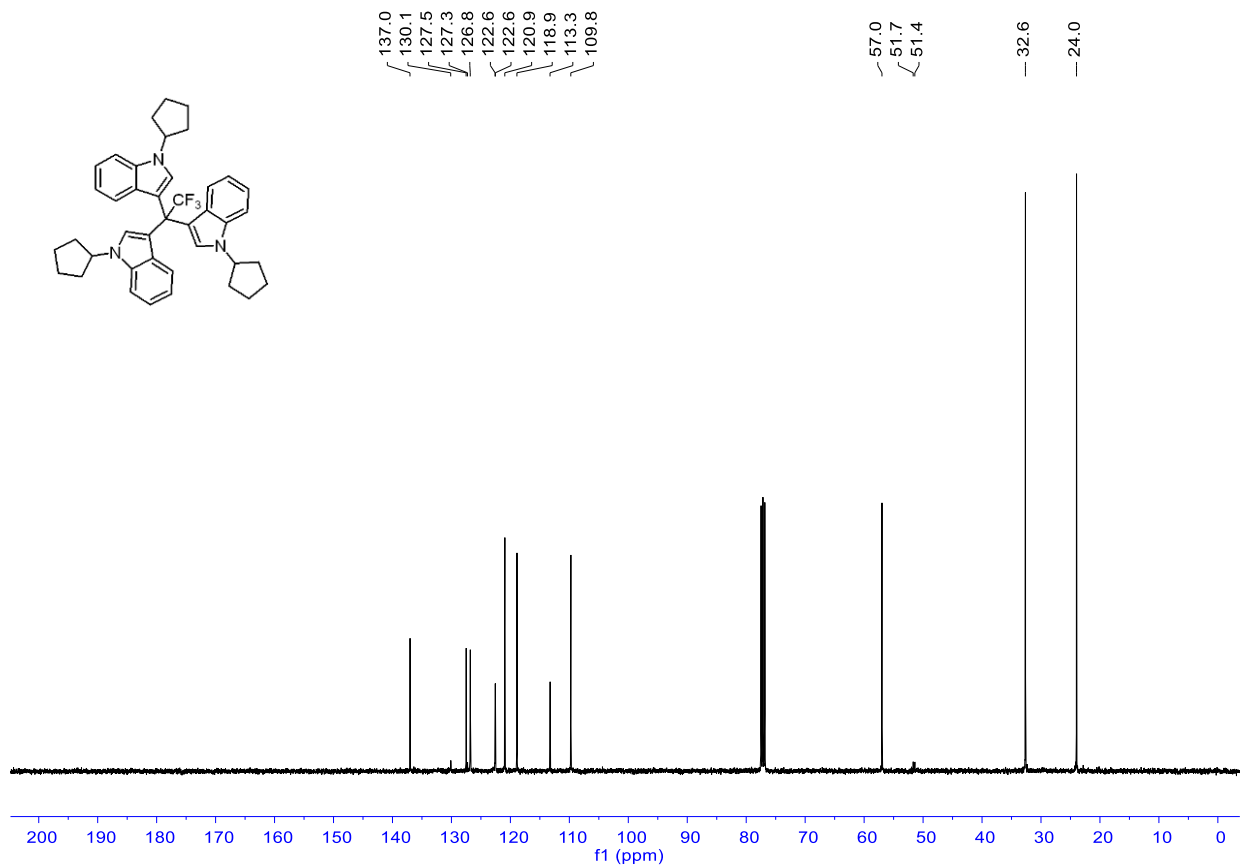

<sup>13</sup>C{<sup>1</sup>H} NMR spectrum of **2g**

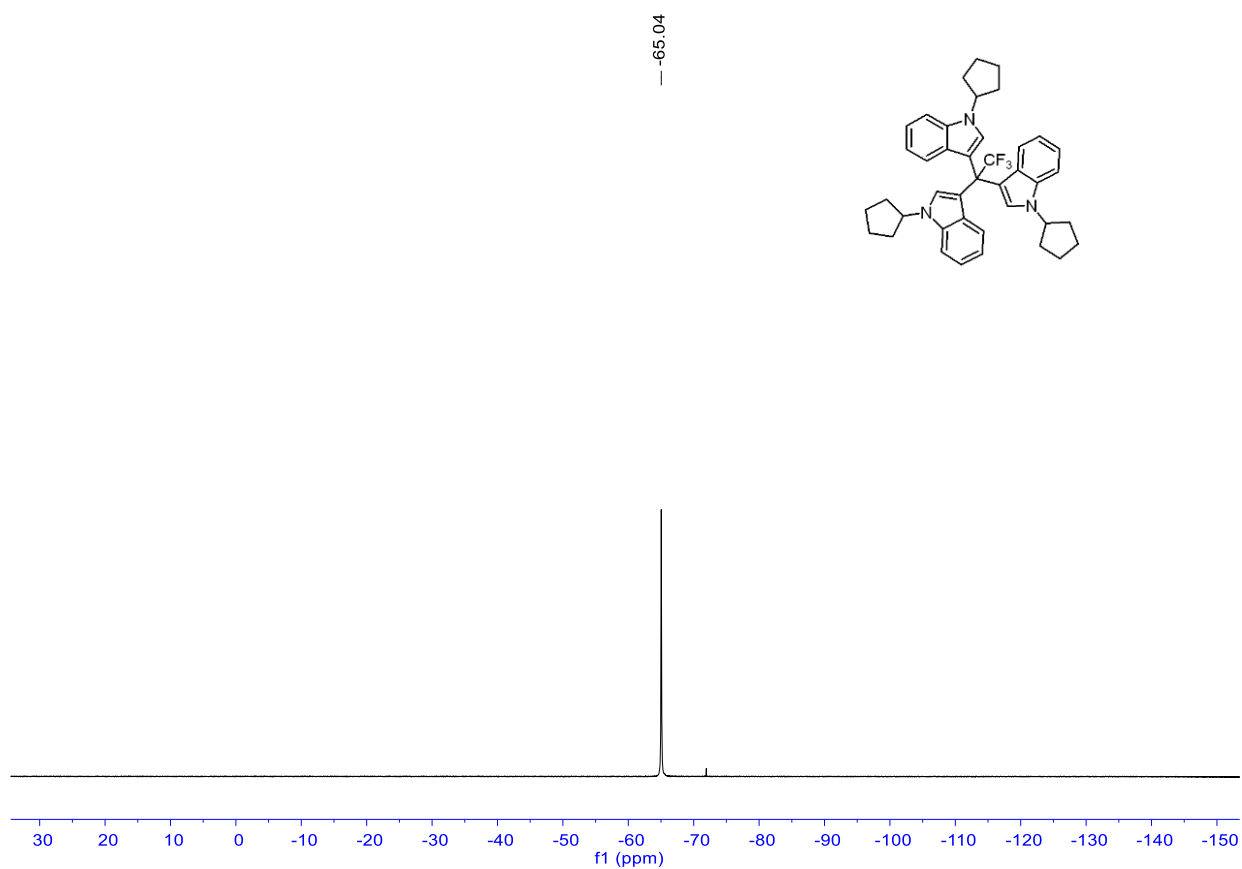

<sup>19</sup>F NMR spectrum of **2g**

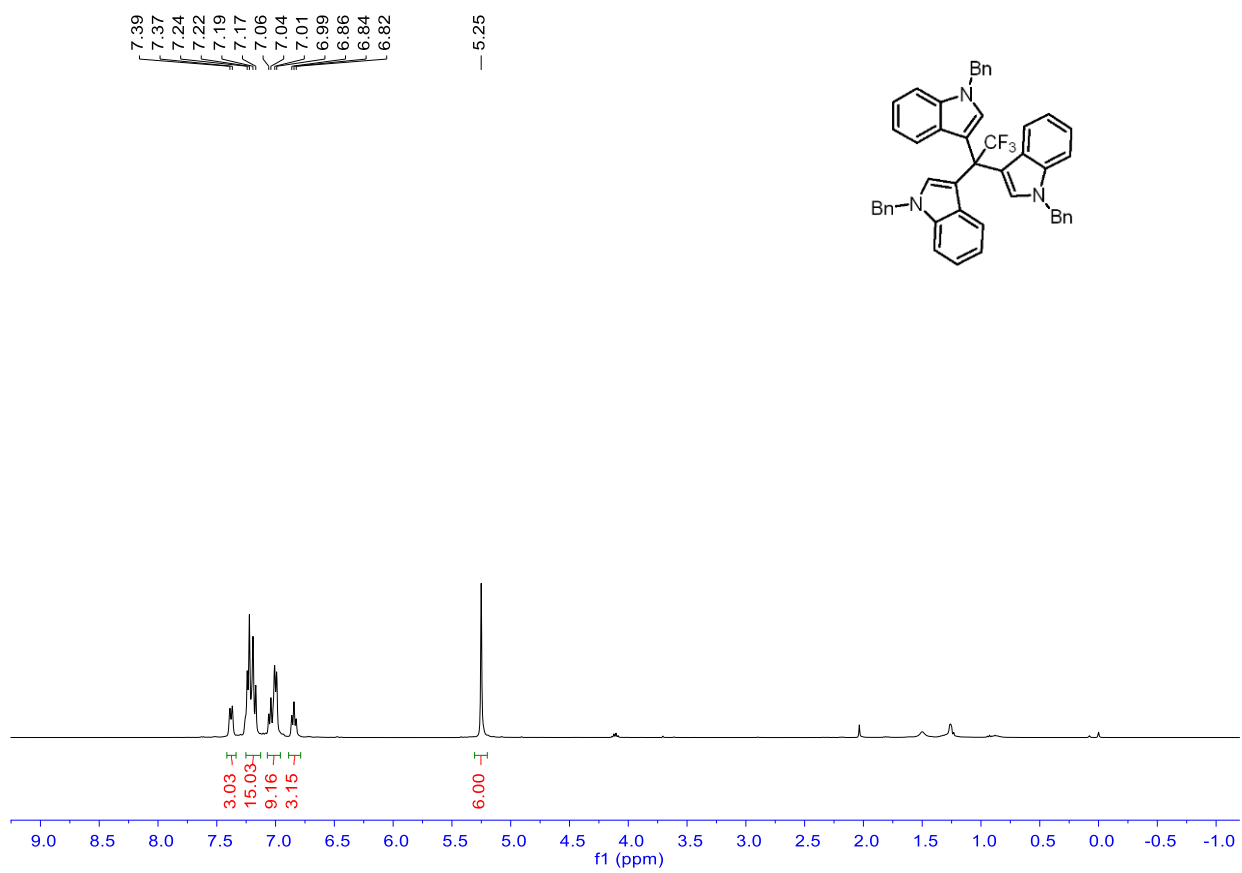

<sup>1</sup>H NMR spectrum of **2h**



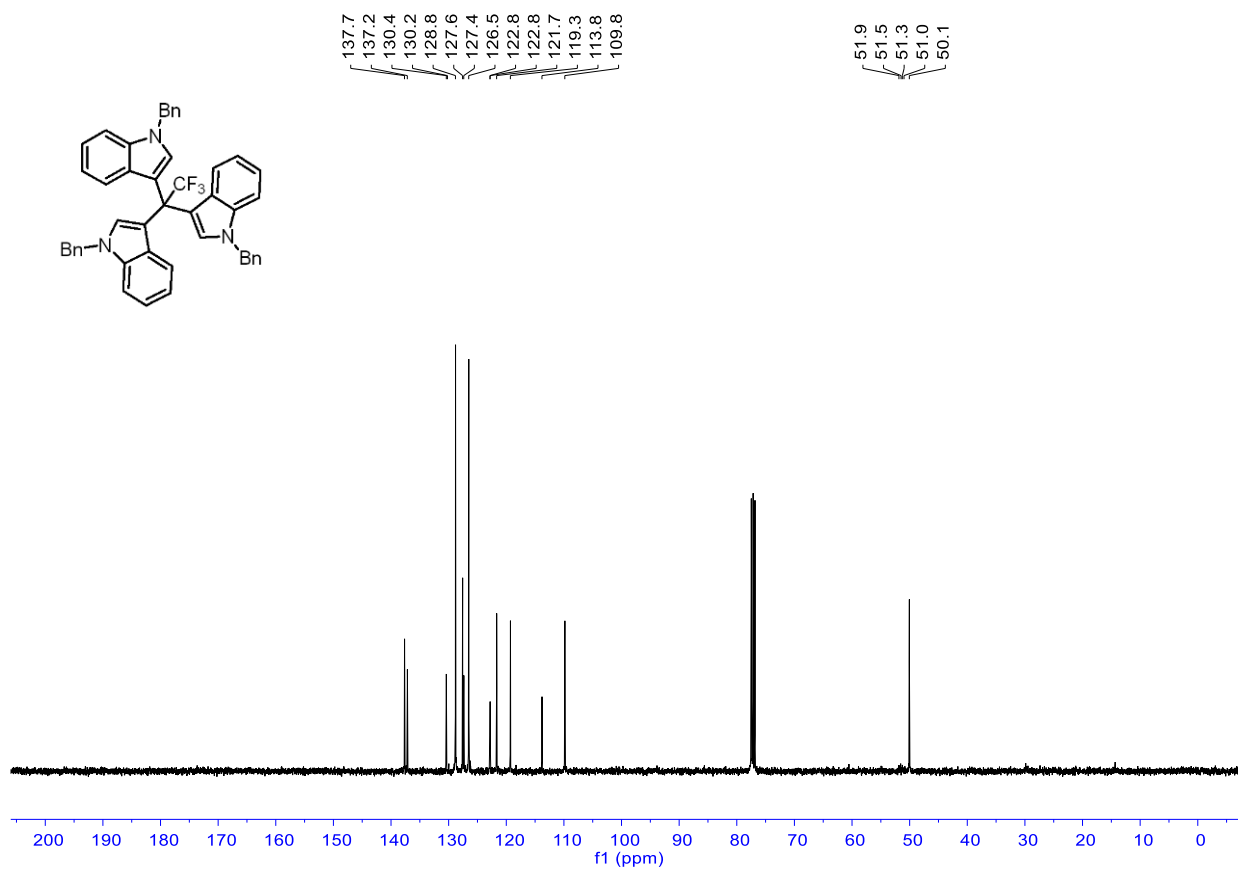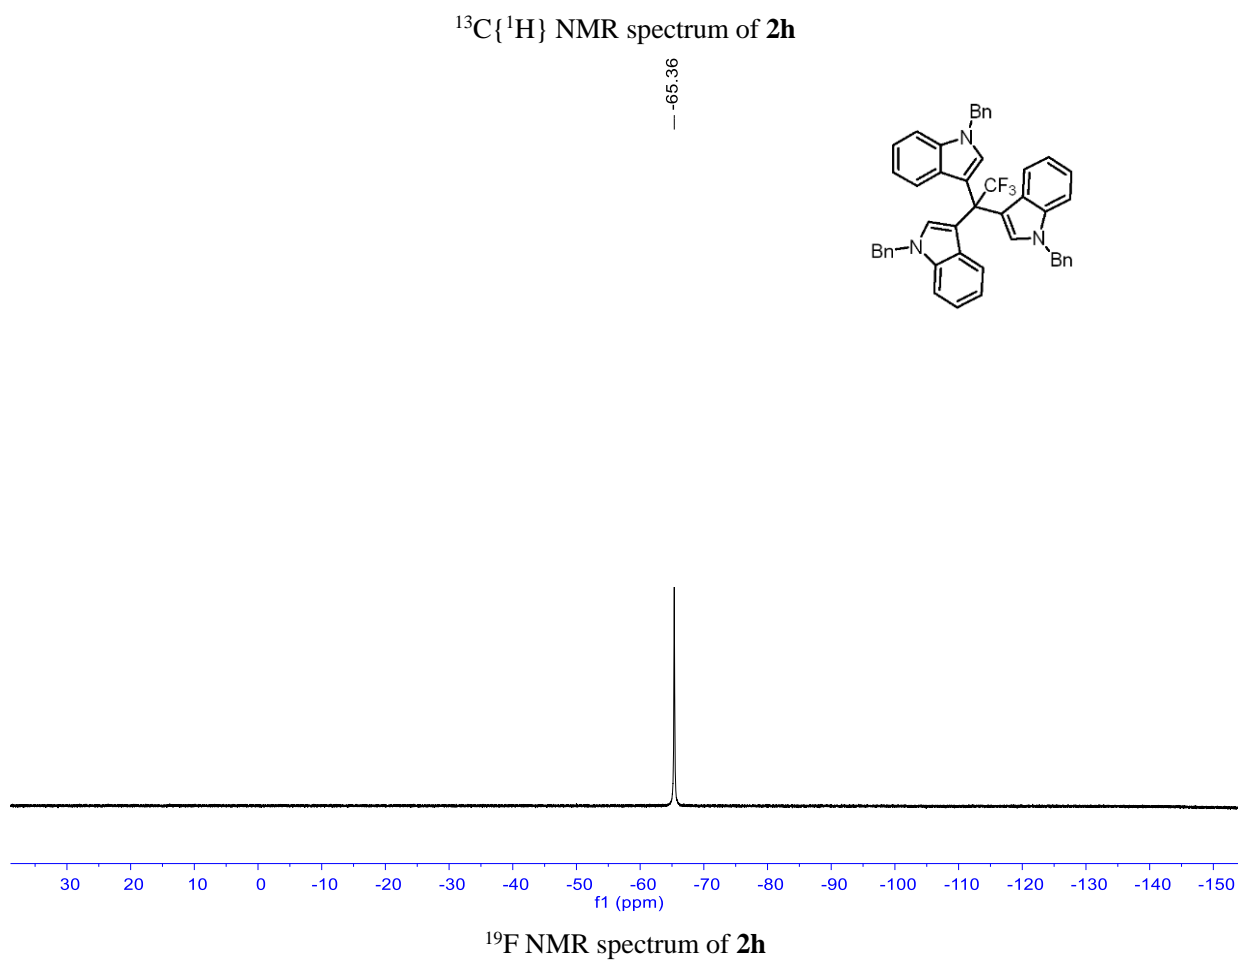

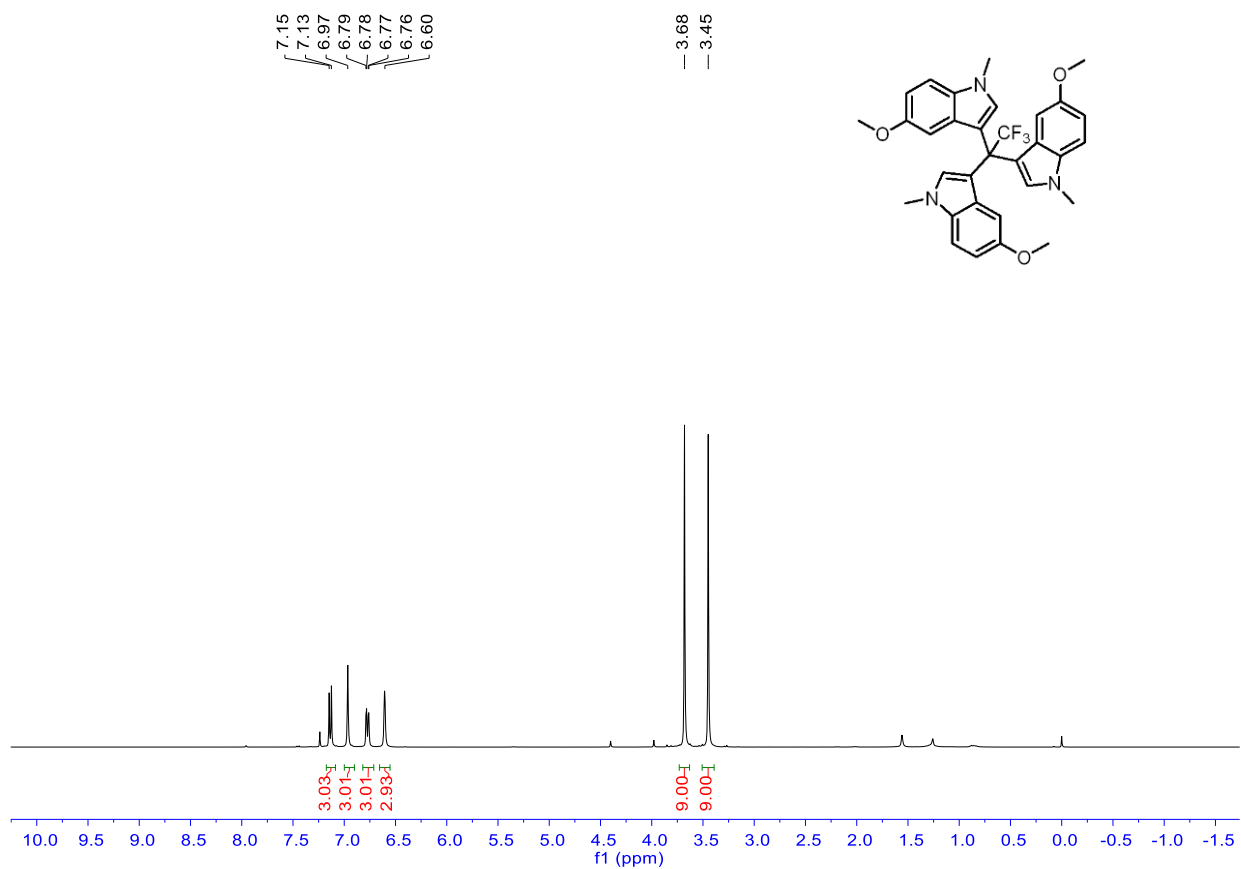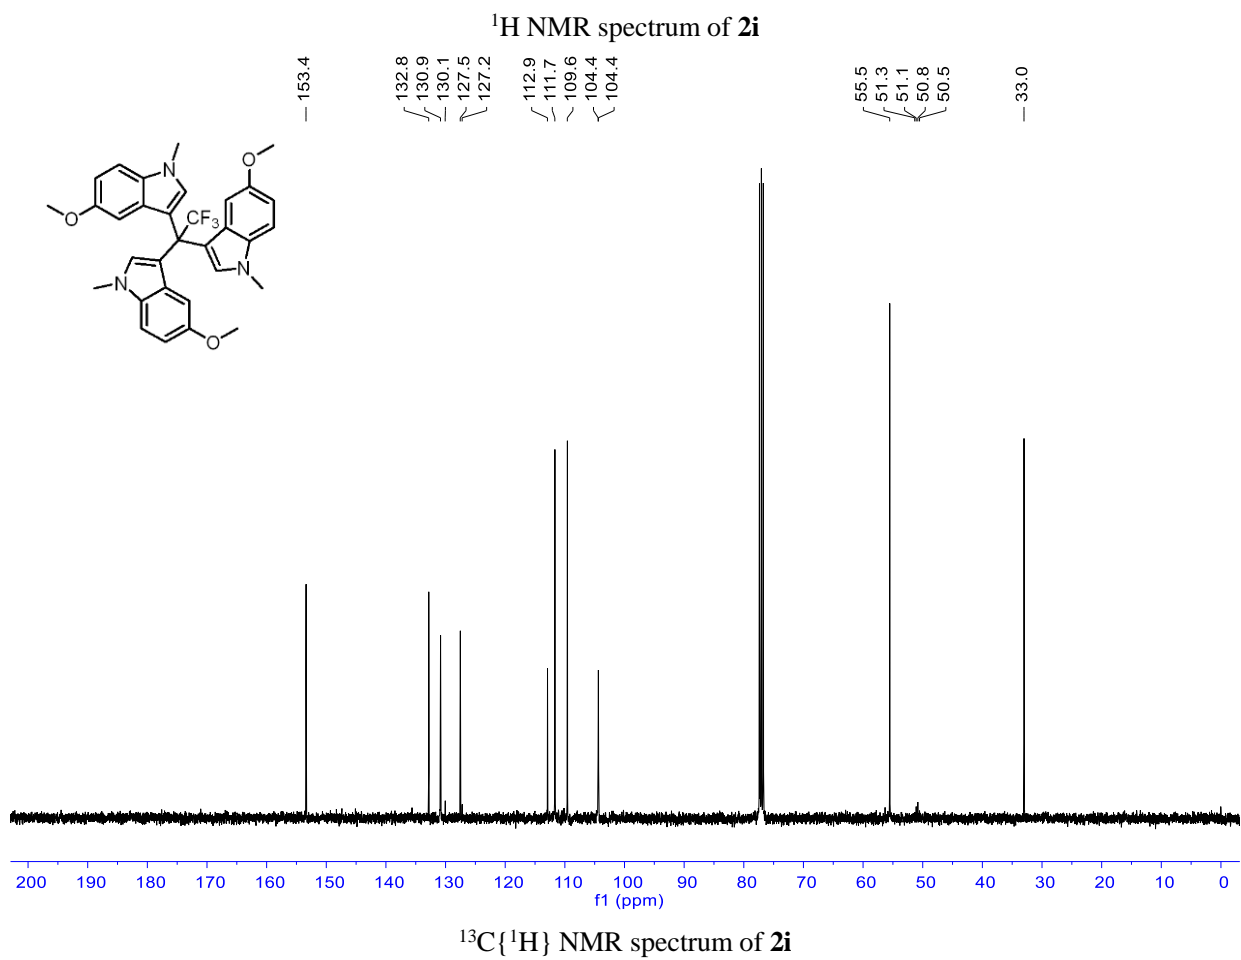

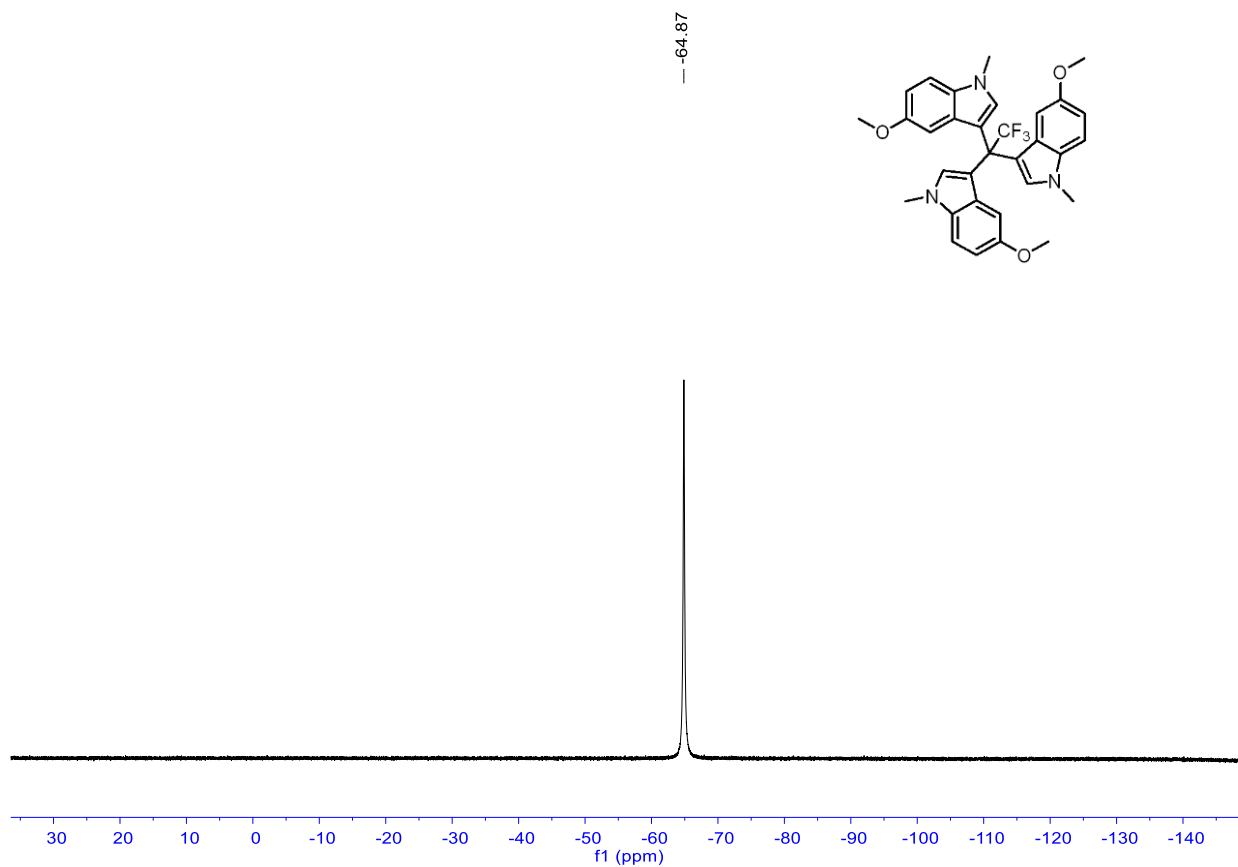

$^{19}\text{F}$  NMR spectrum of **2i**

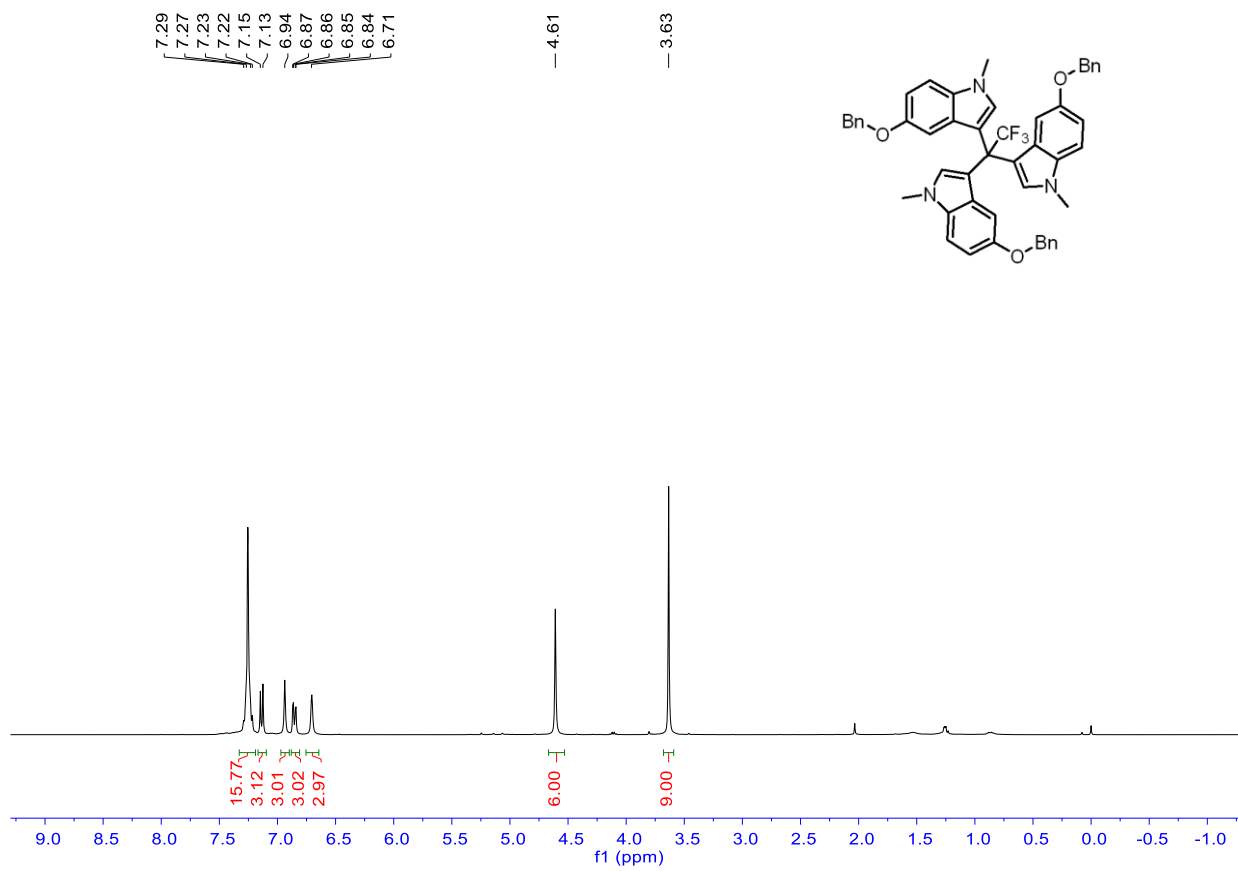

$^1\text{H}$  NMR spectrum of **2j**

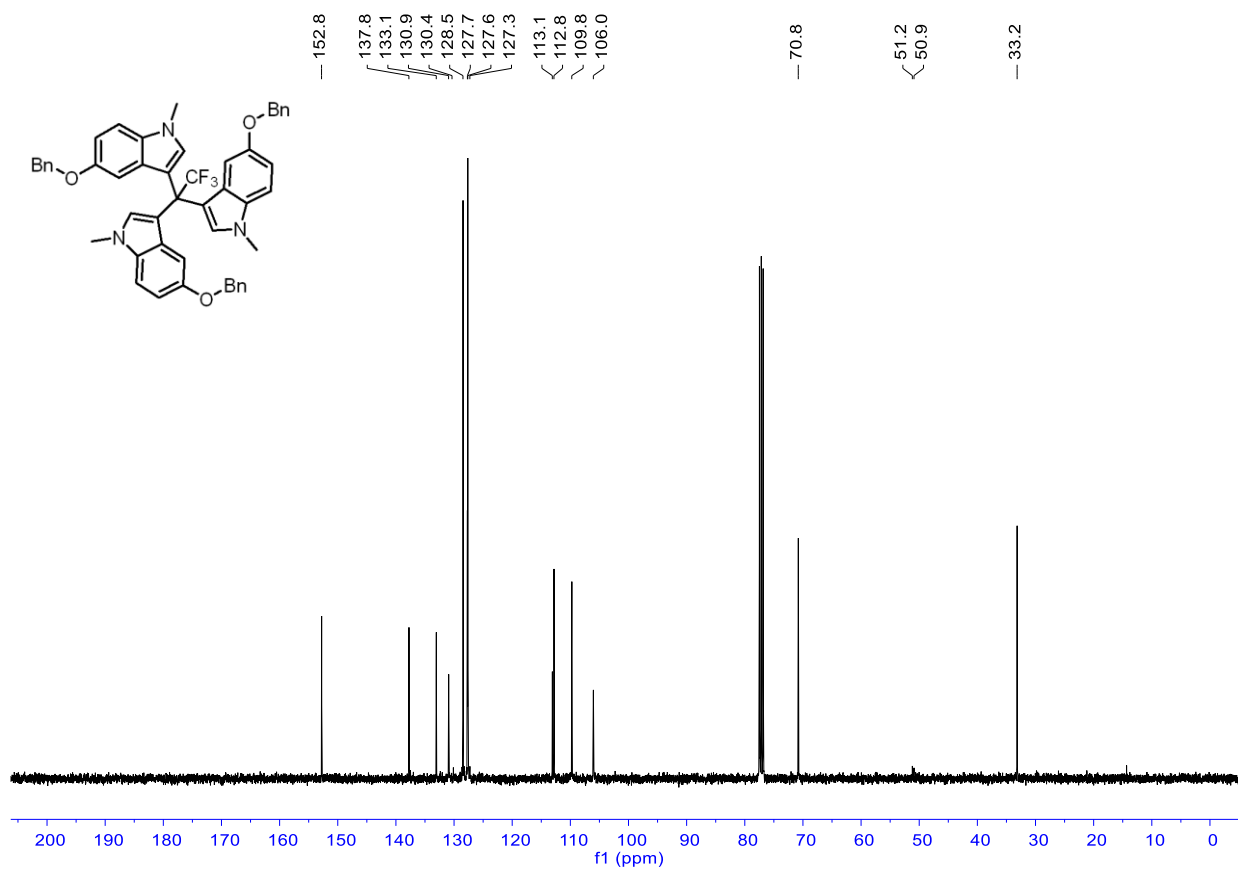

$^{13}\text{C}\{^1\text{H}\}$  NMR spectrum of **2j**

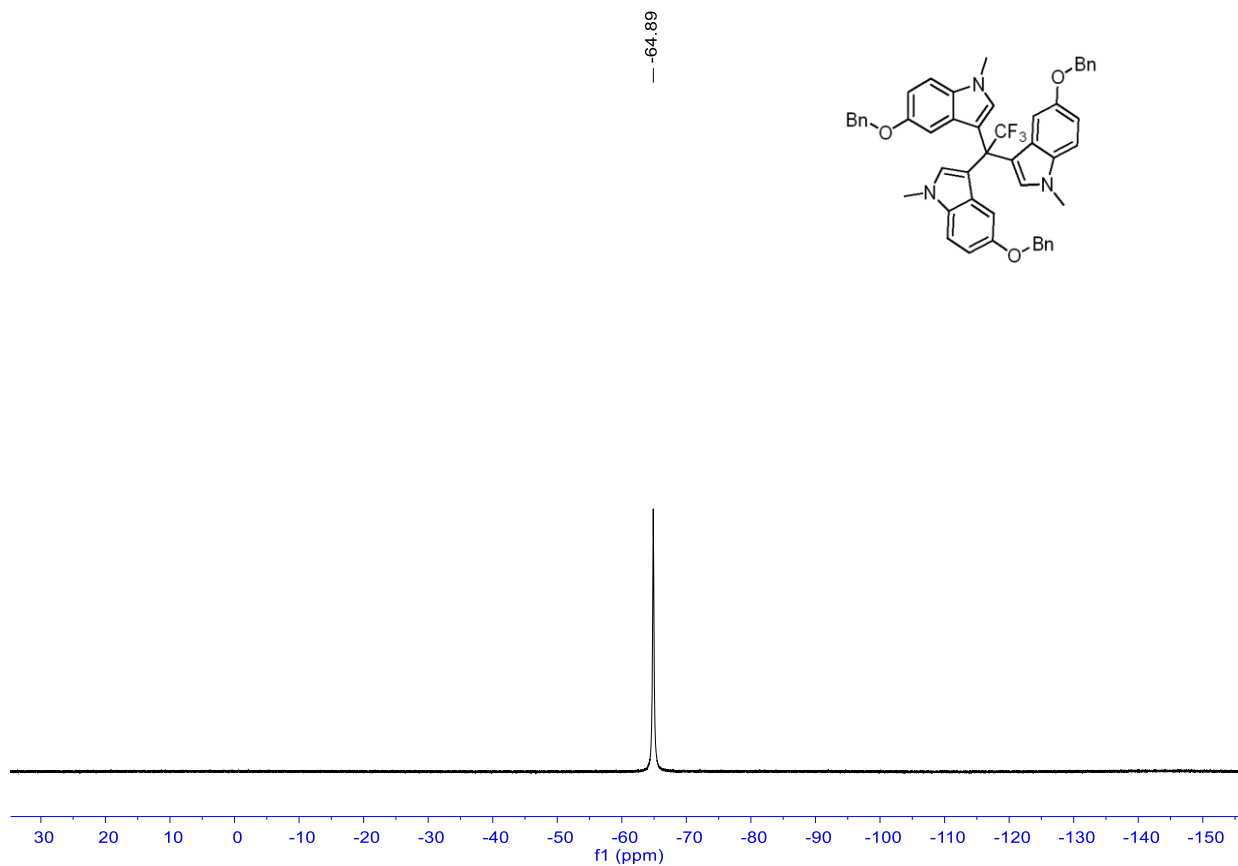

$^{19}\text{F}$  NMR spectrum of **2j**

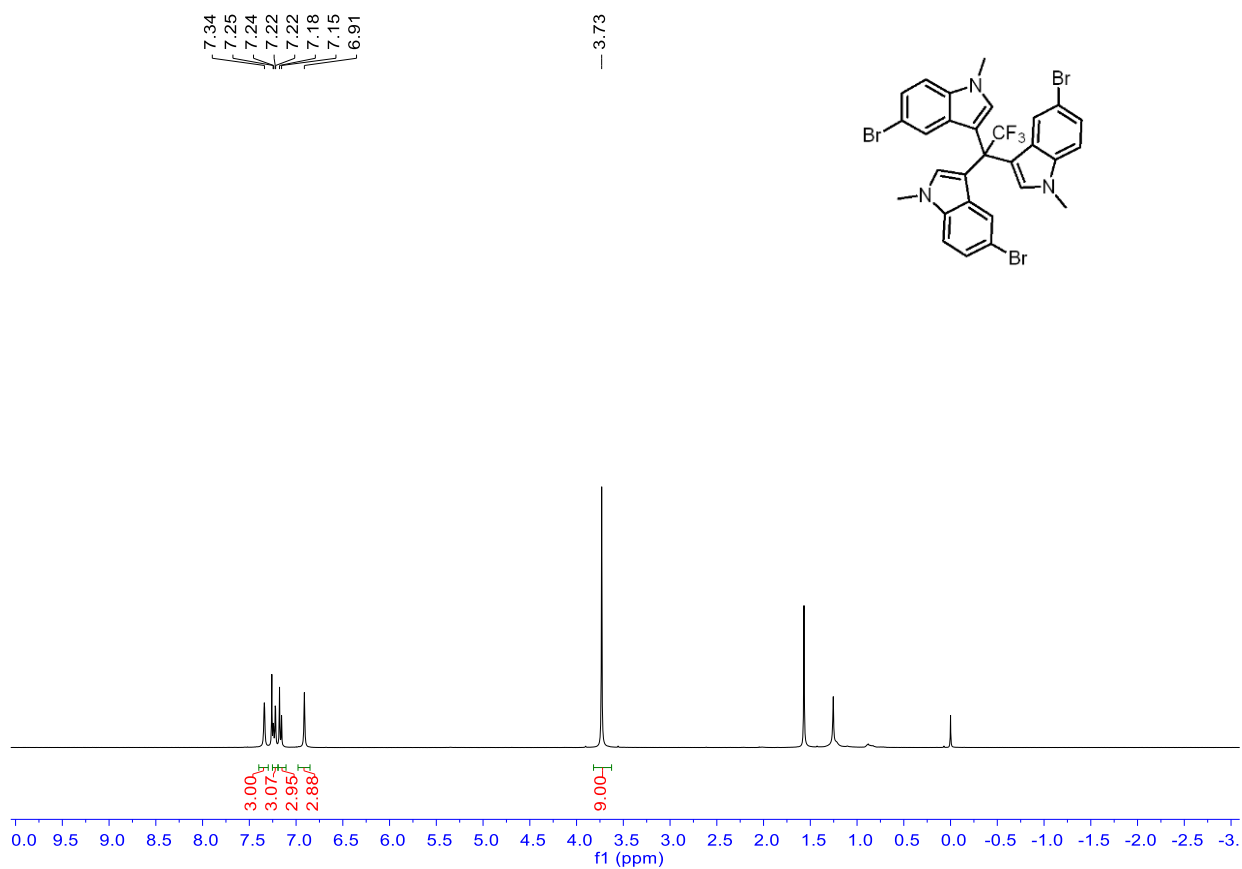

<sup>1</sup>H NMR spectrum of **2k**

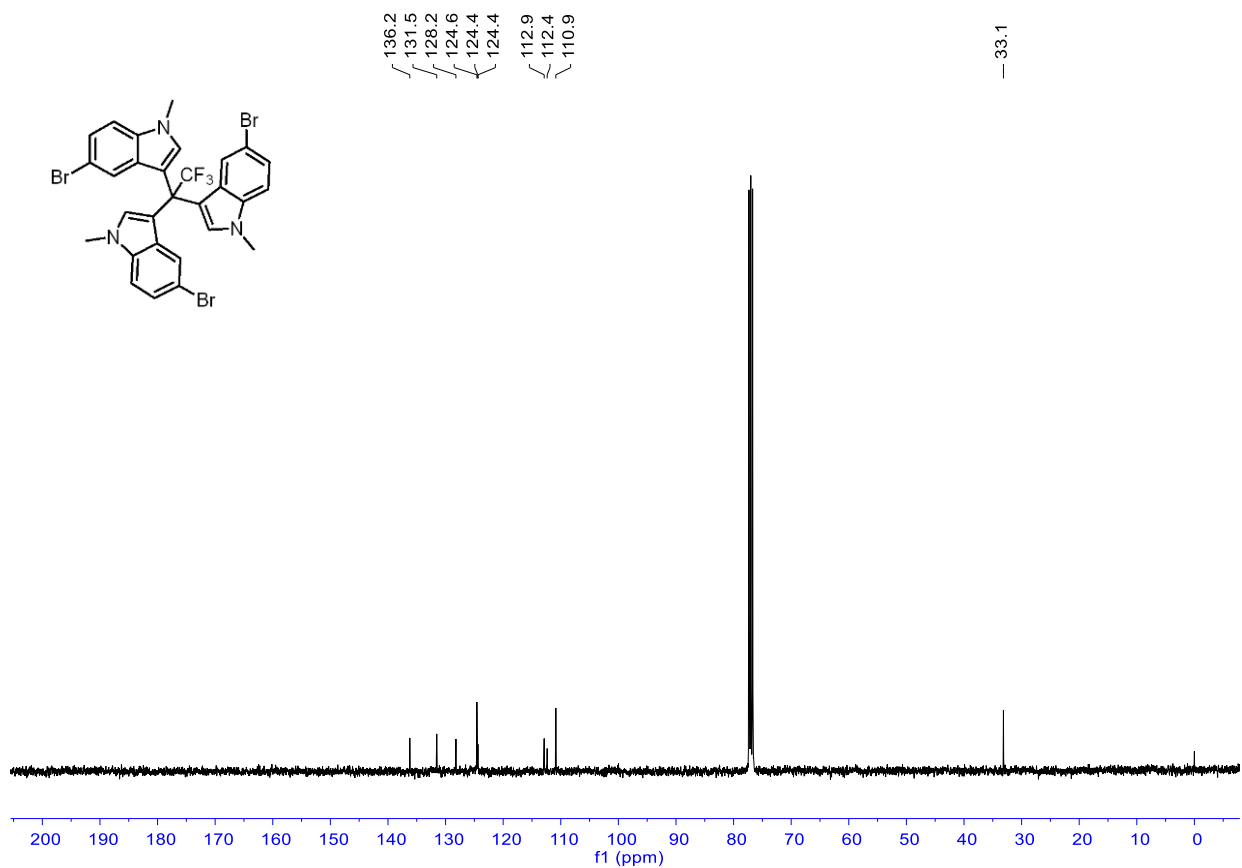

<sup>13</sup>C{<sup>1</sup>H} NMR spectrum of **2k**

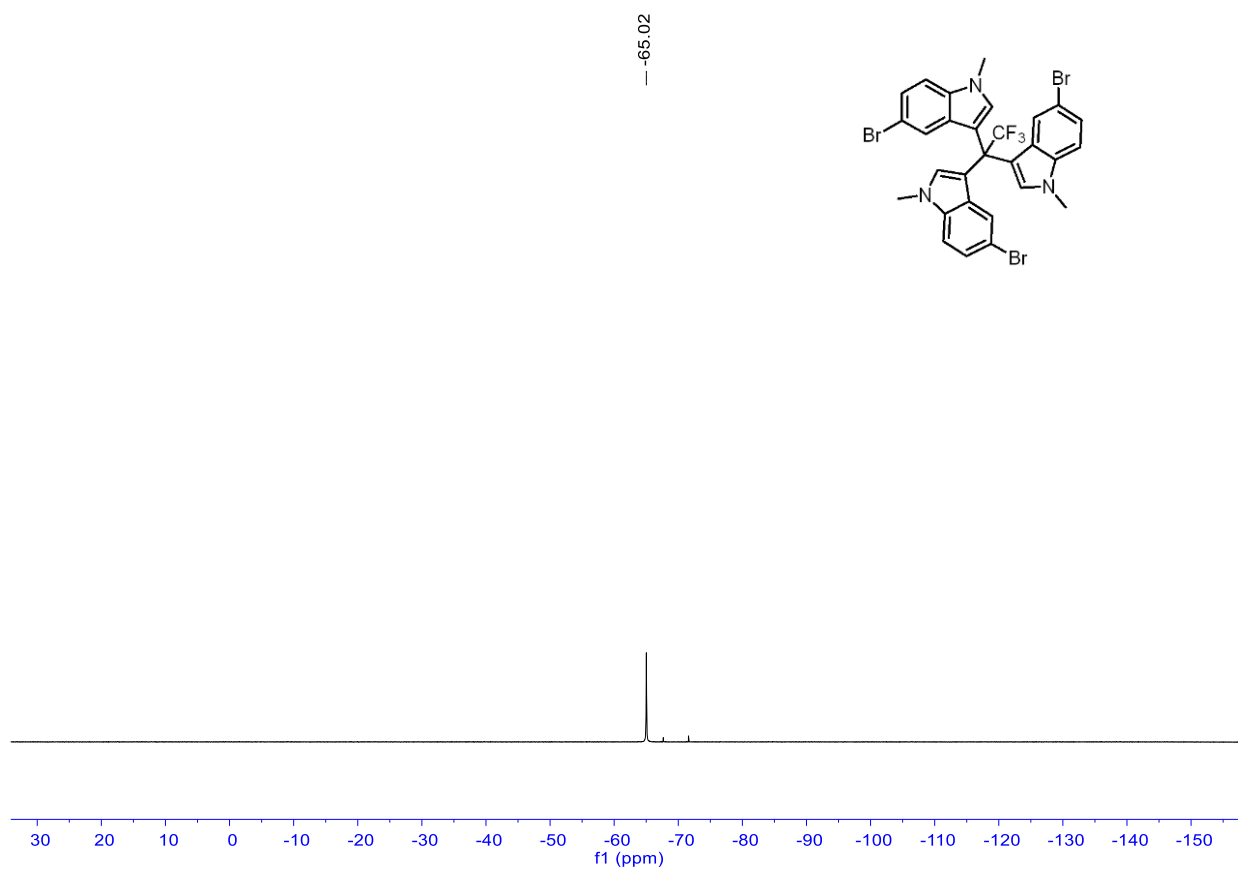

<sup>19</sup>F NMR spectrum of **2k**

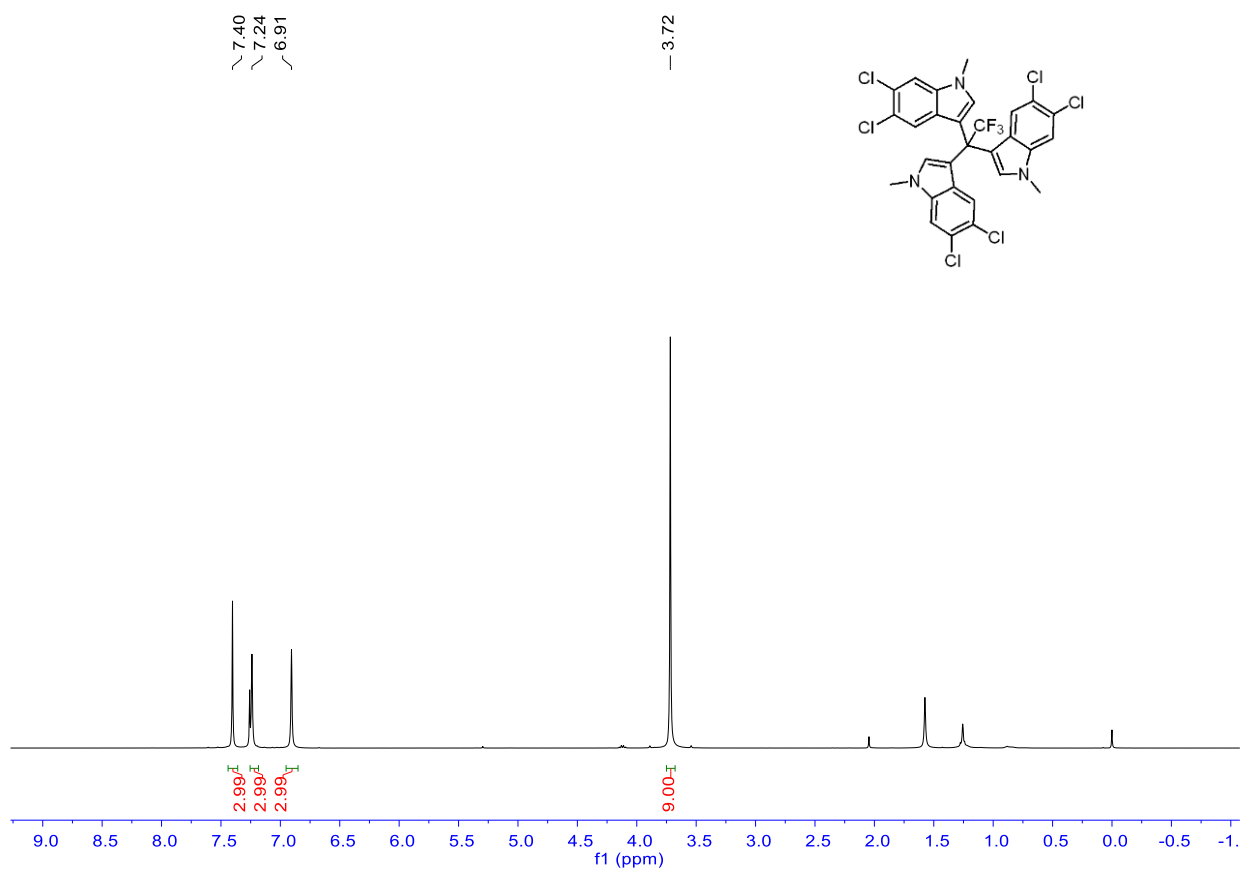

<sup>1</sup>H NMR spectrum of **2l**

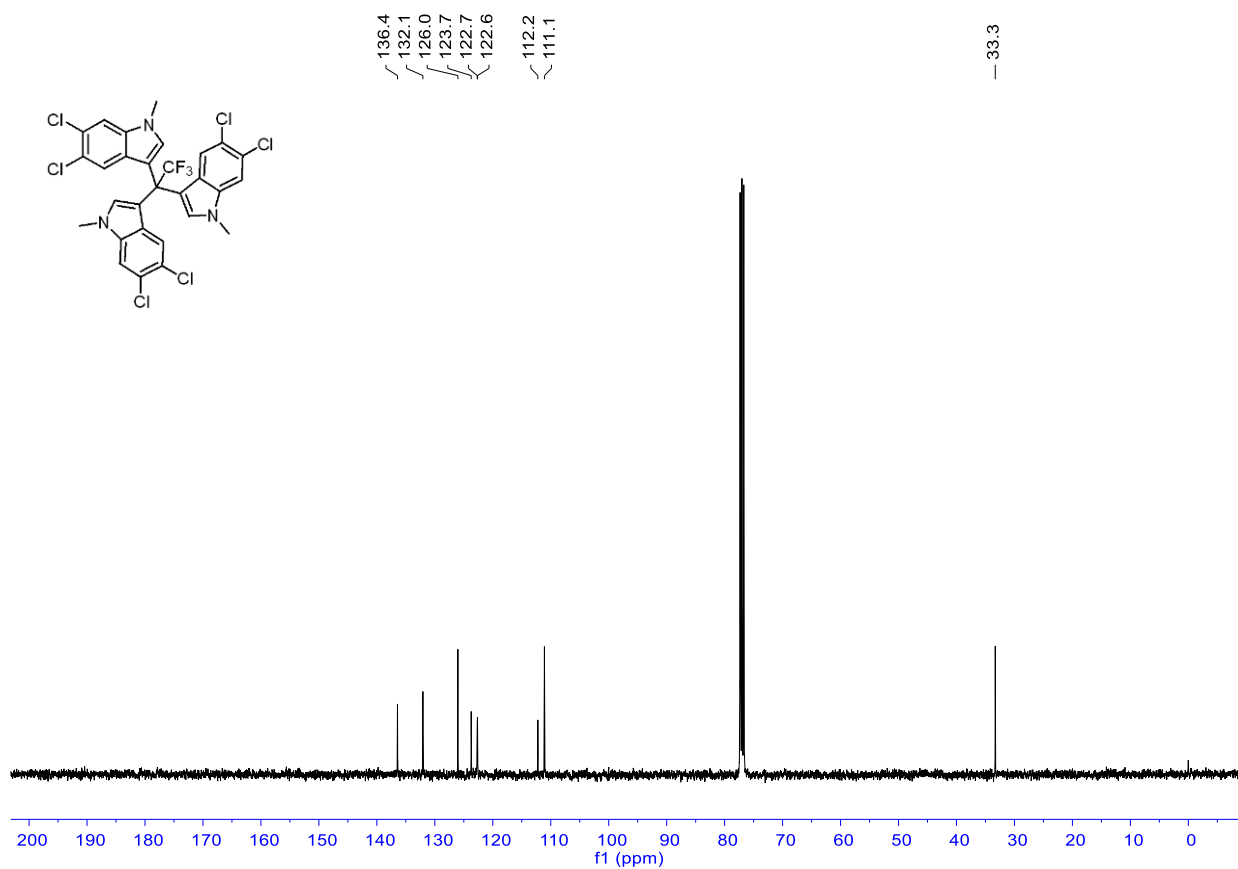

<sup>13</sup>C{<sup>1</sup>H} NMR spectrum of **2I**

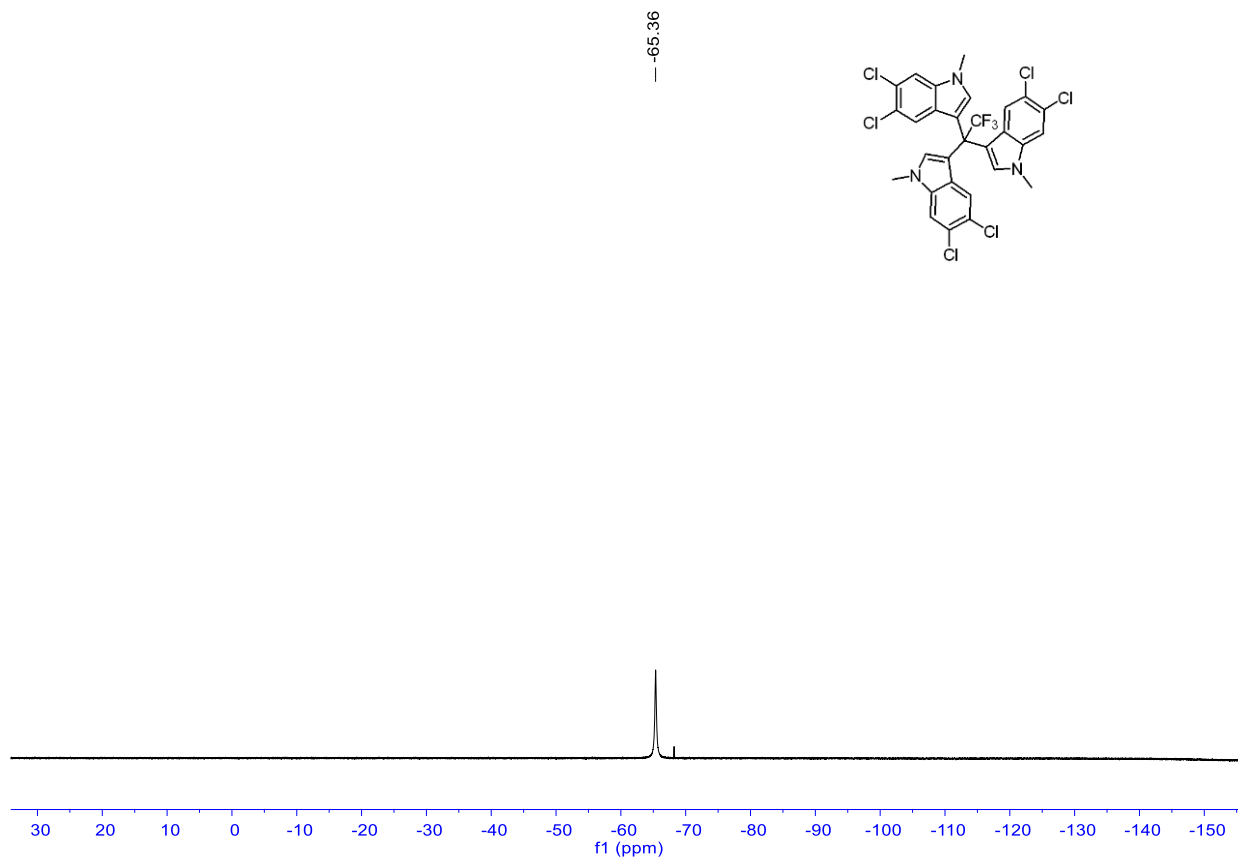

<sup>19</sup>F NMR spectrum of **2I**

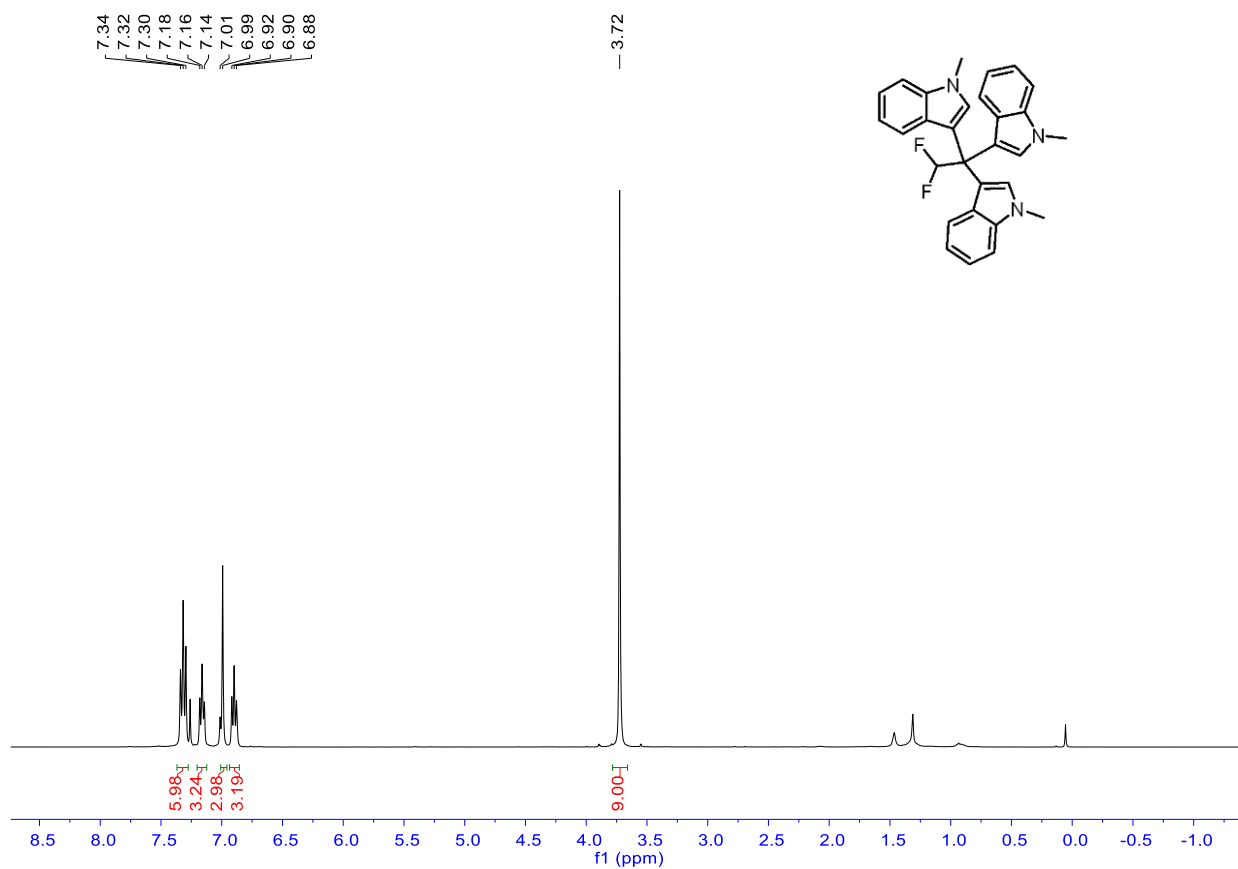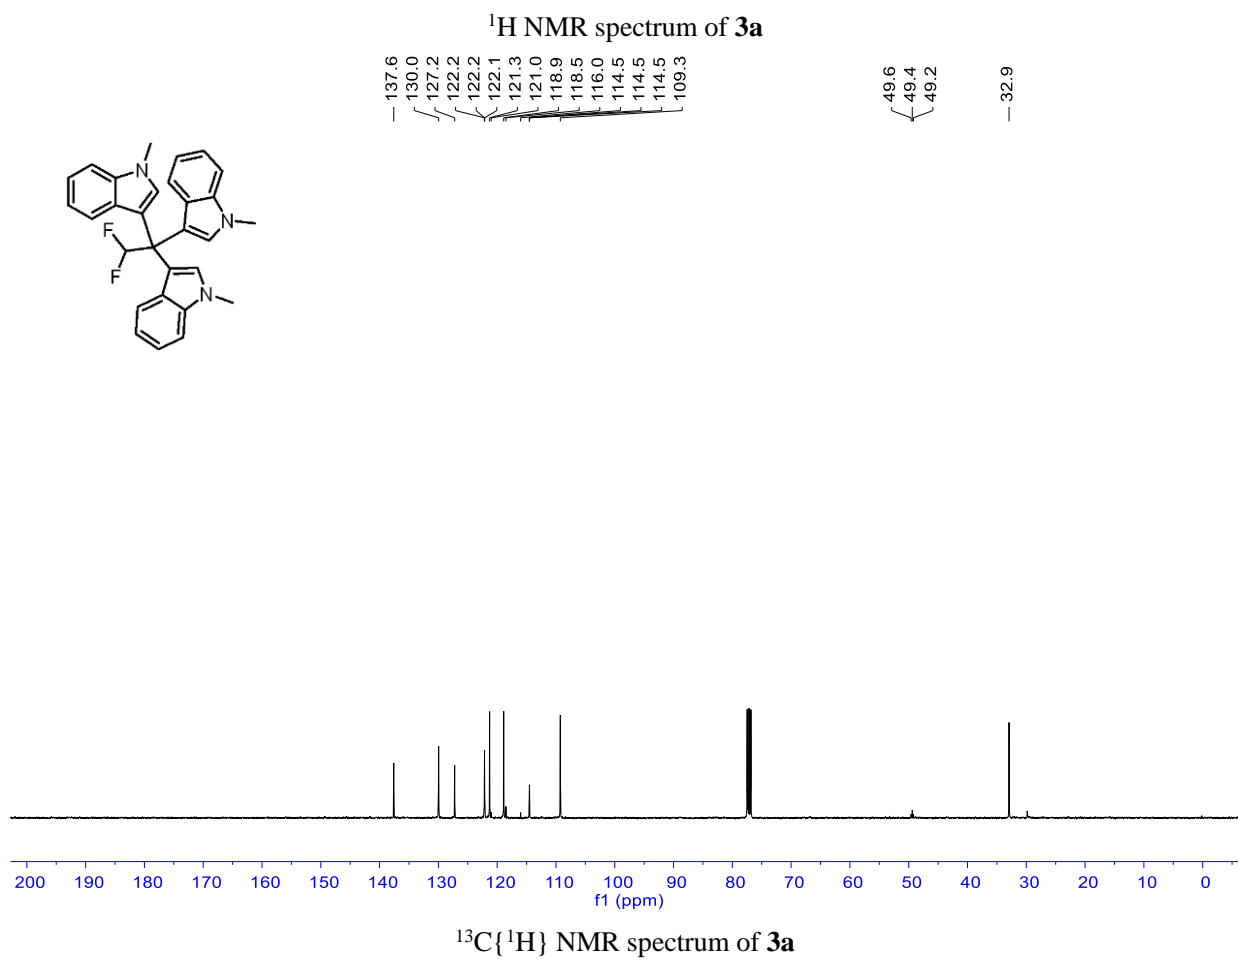



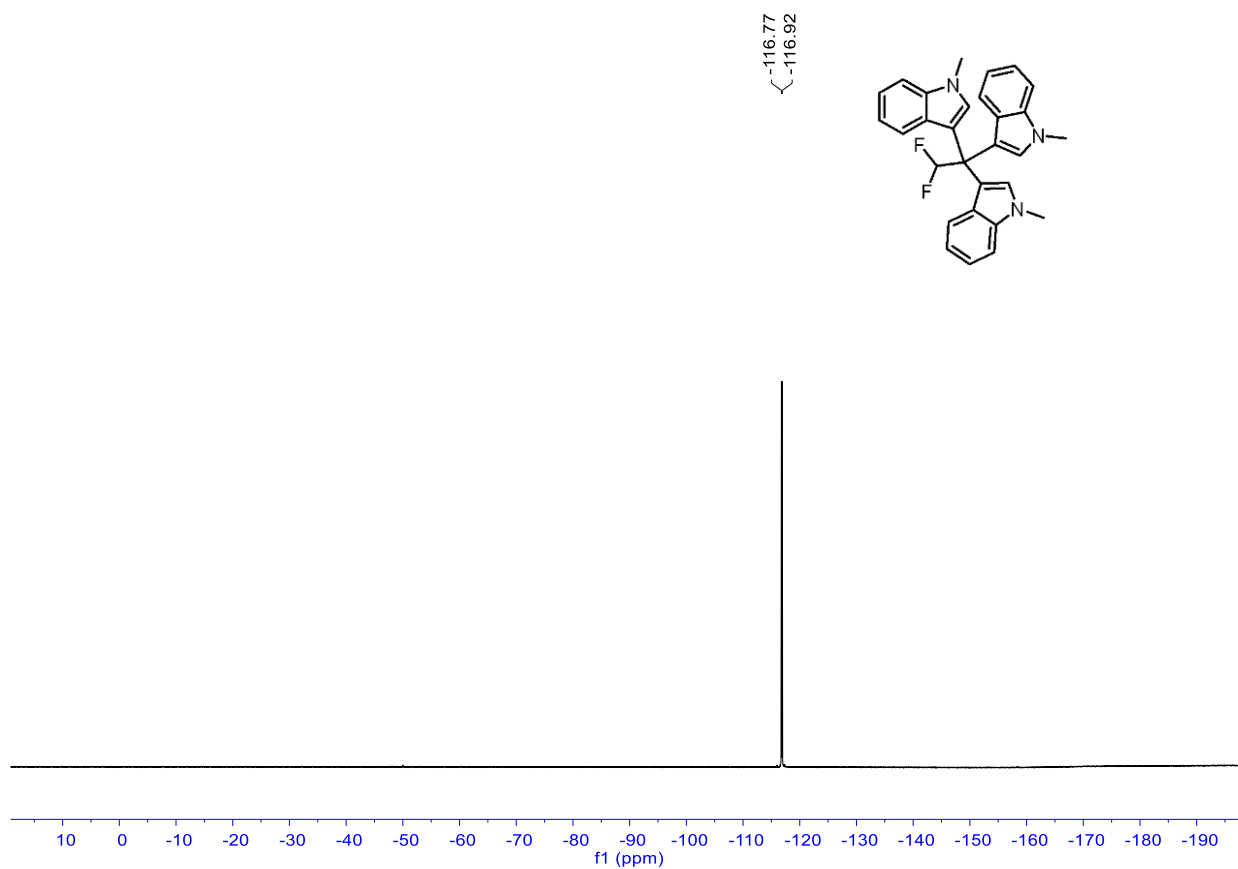

$^{19}\text{F}$  NMR spectrum of **3a**

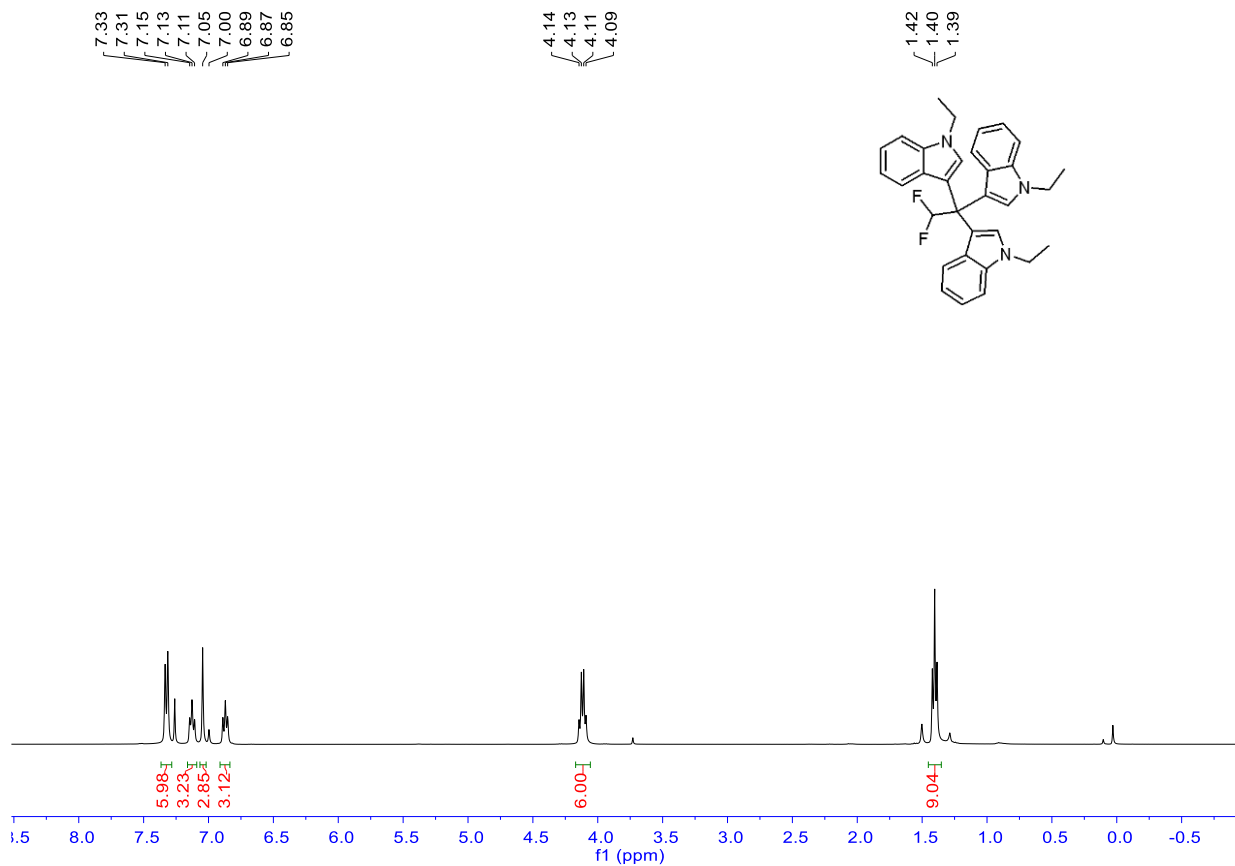

$^1\text{H}$  NMR spectrum of **3b**

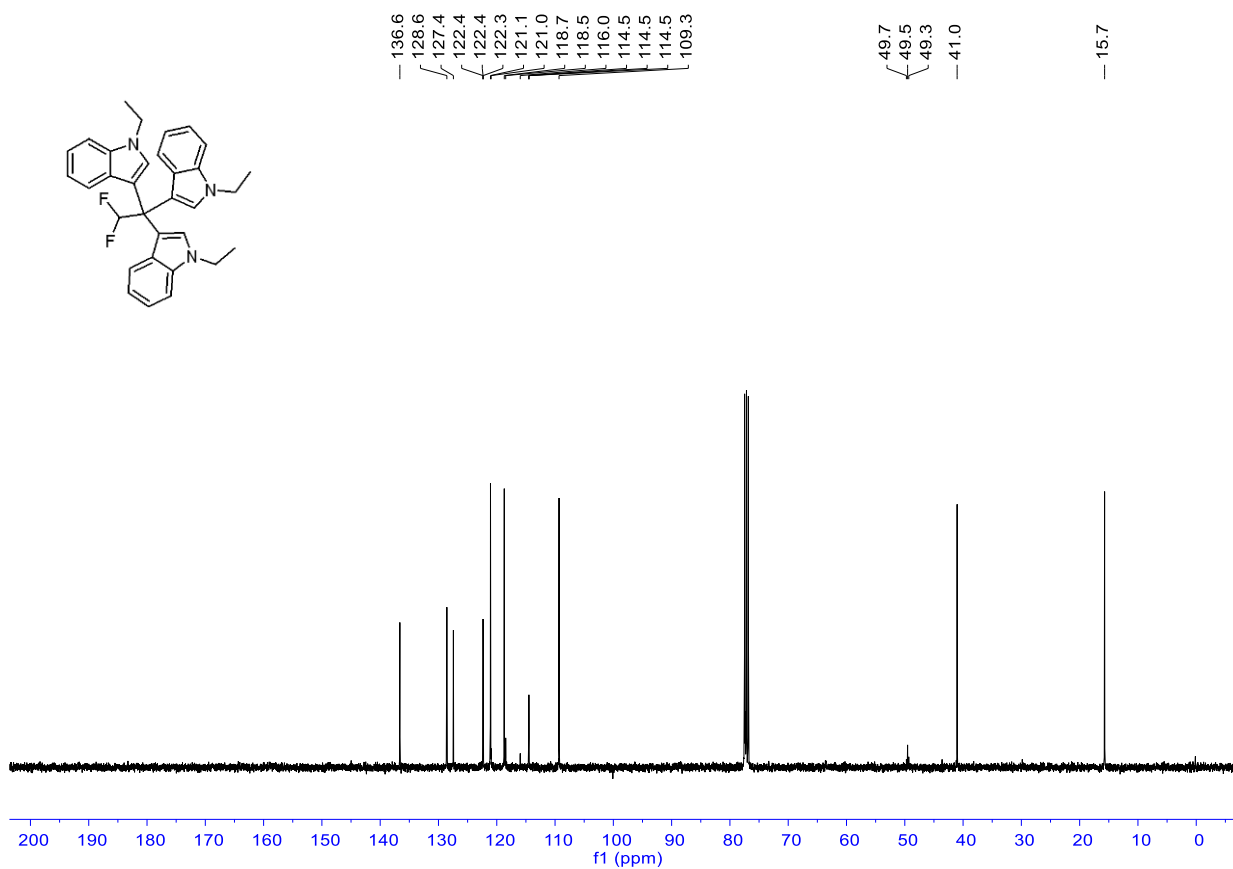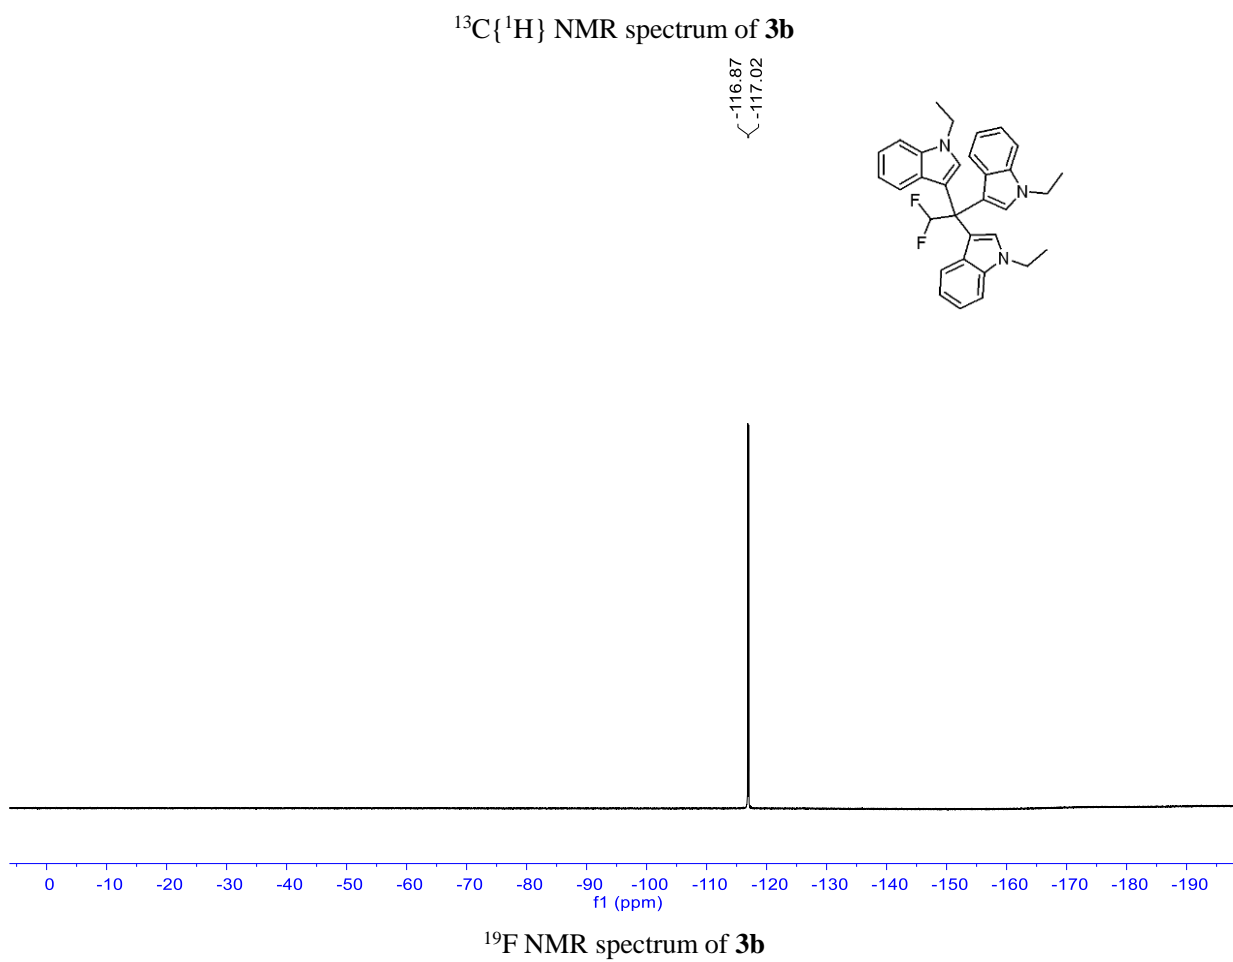

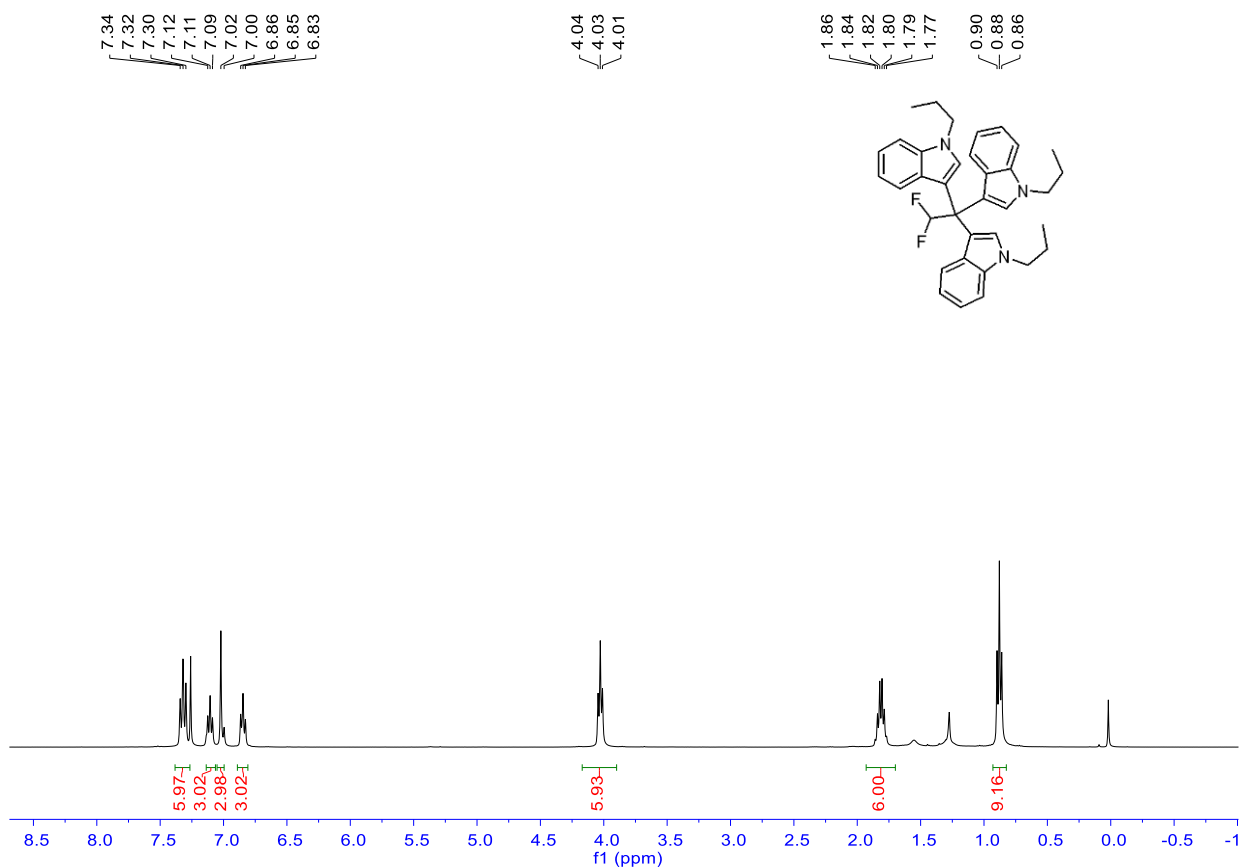

<sup>1</sup>H NMR spectrum of **3c**

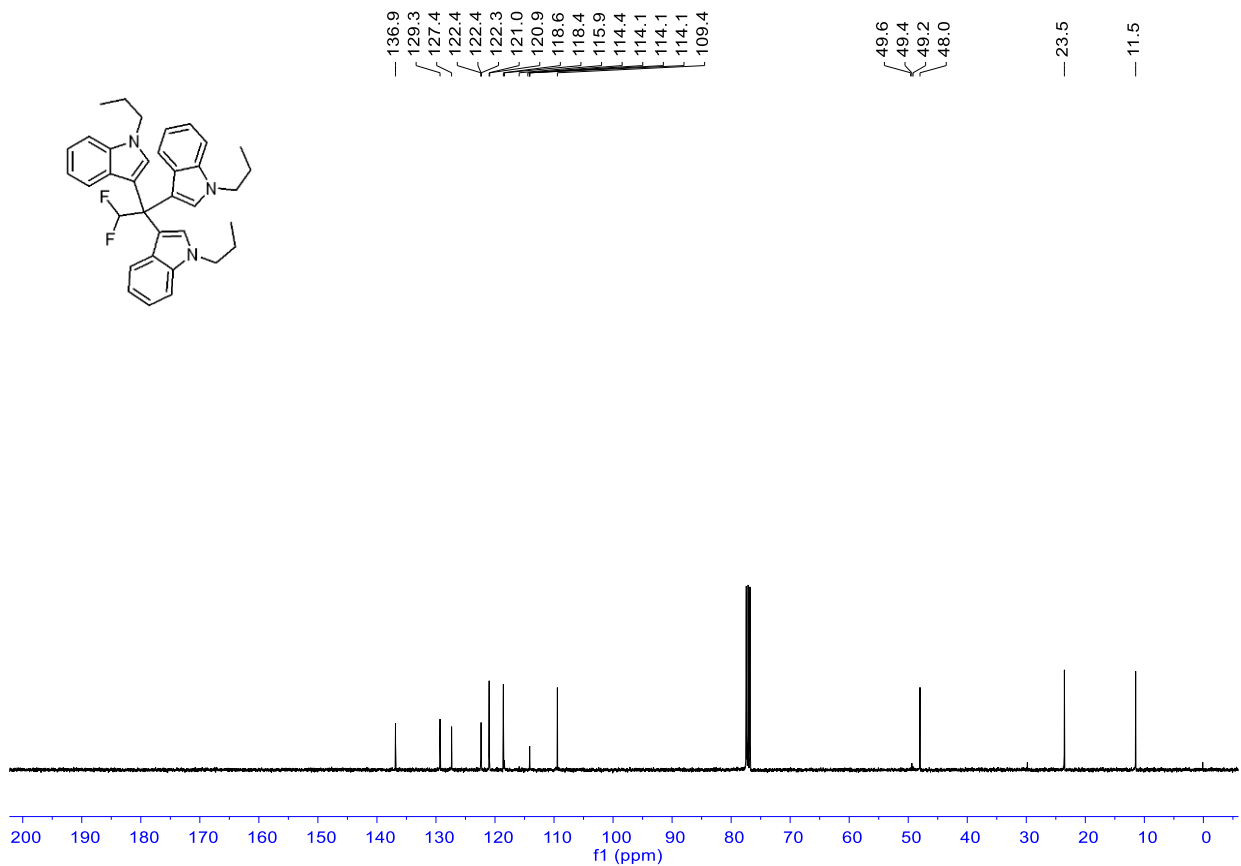

<sup>13</sup>C{<sup>1</sup>H} NMR spectrum of **3c**

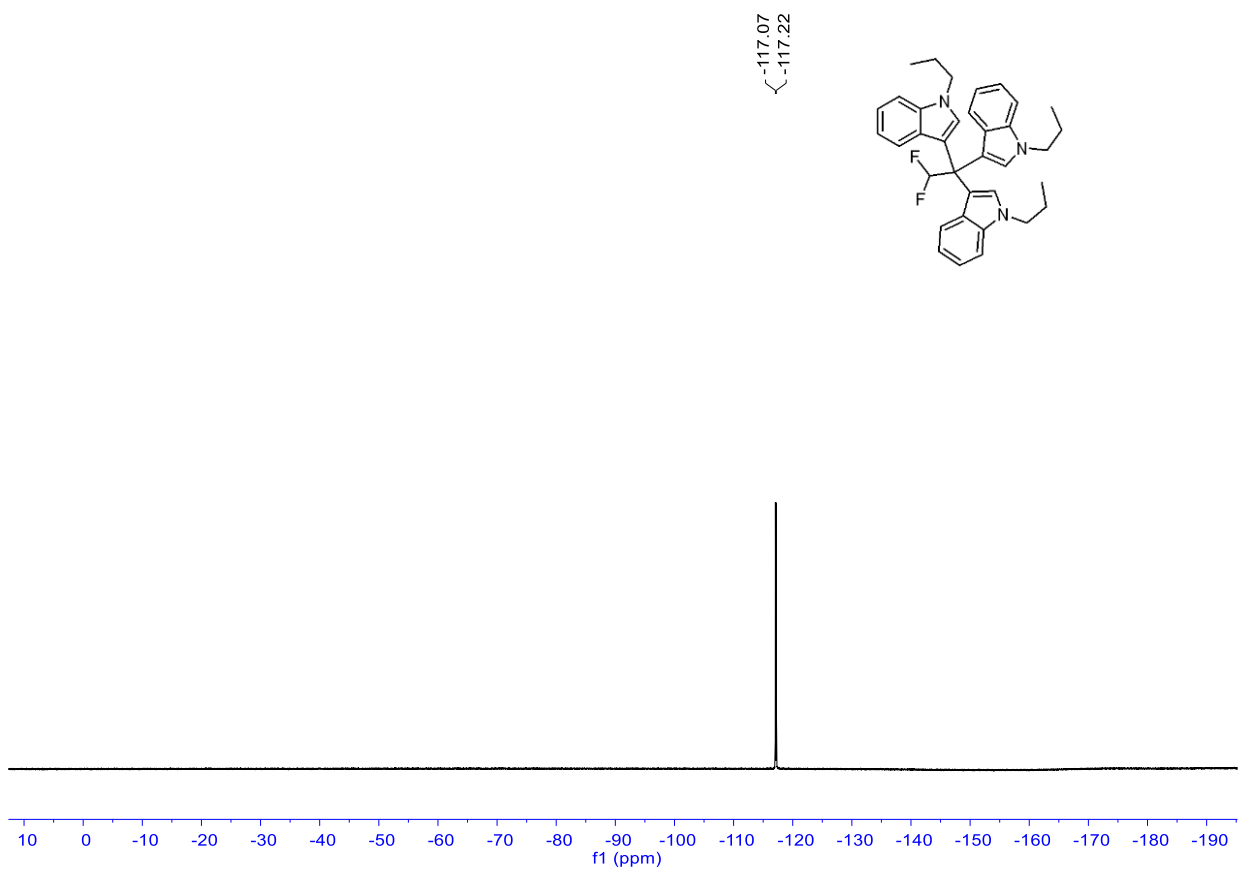

$^{19}\text{F}$  NMR spectrum of **3c**

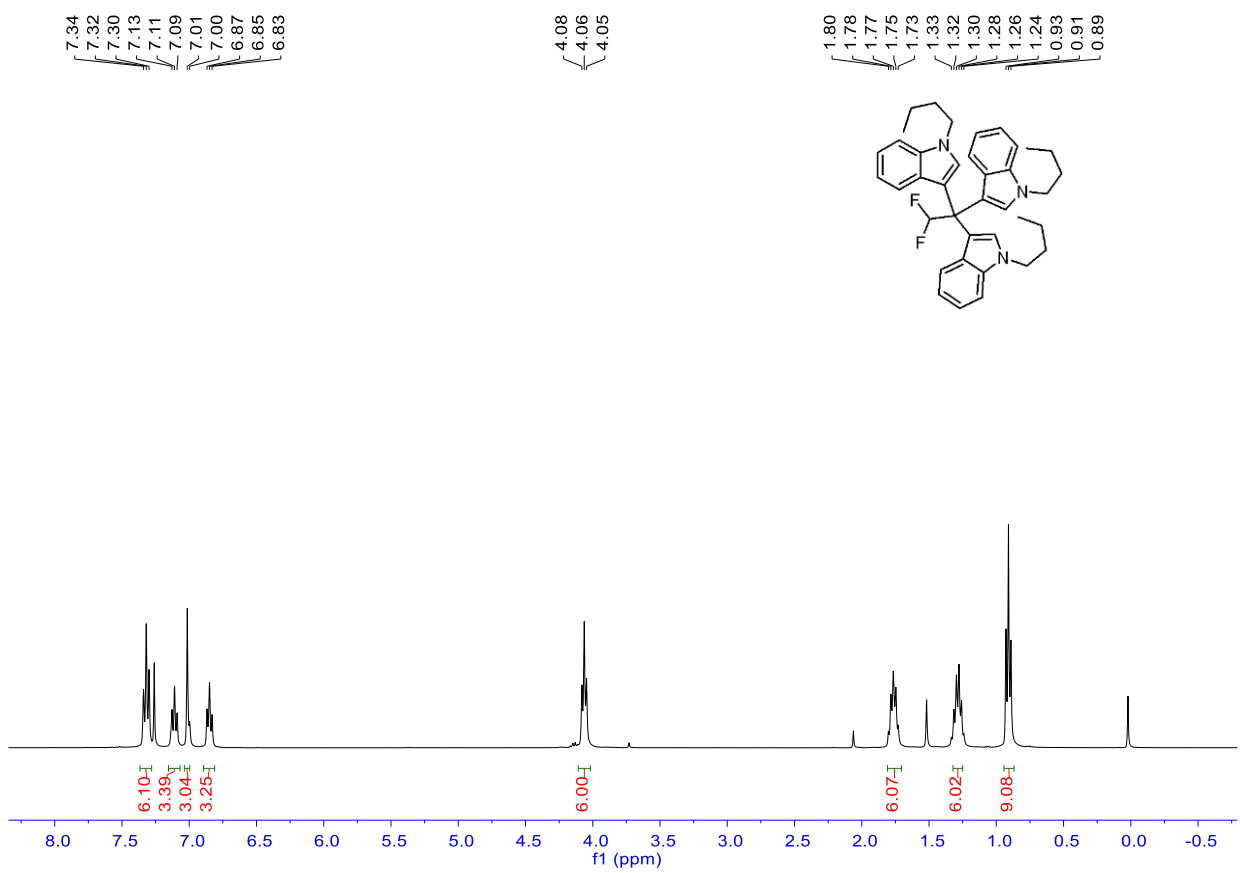

$^1\text{H}$  NMR spectrum of **3d**

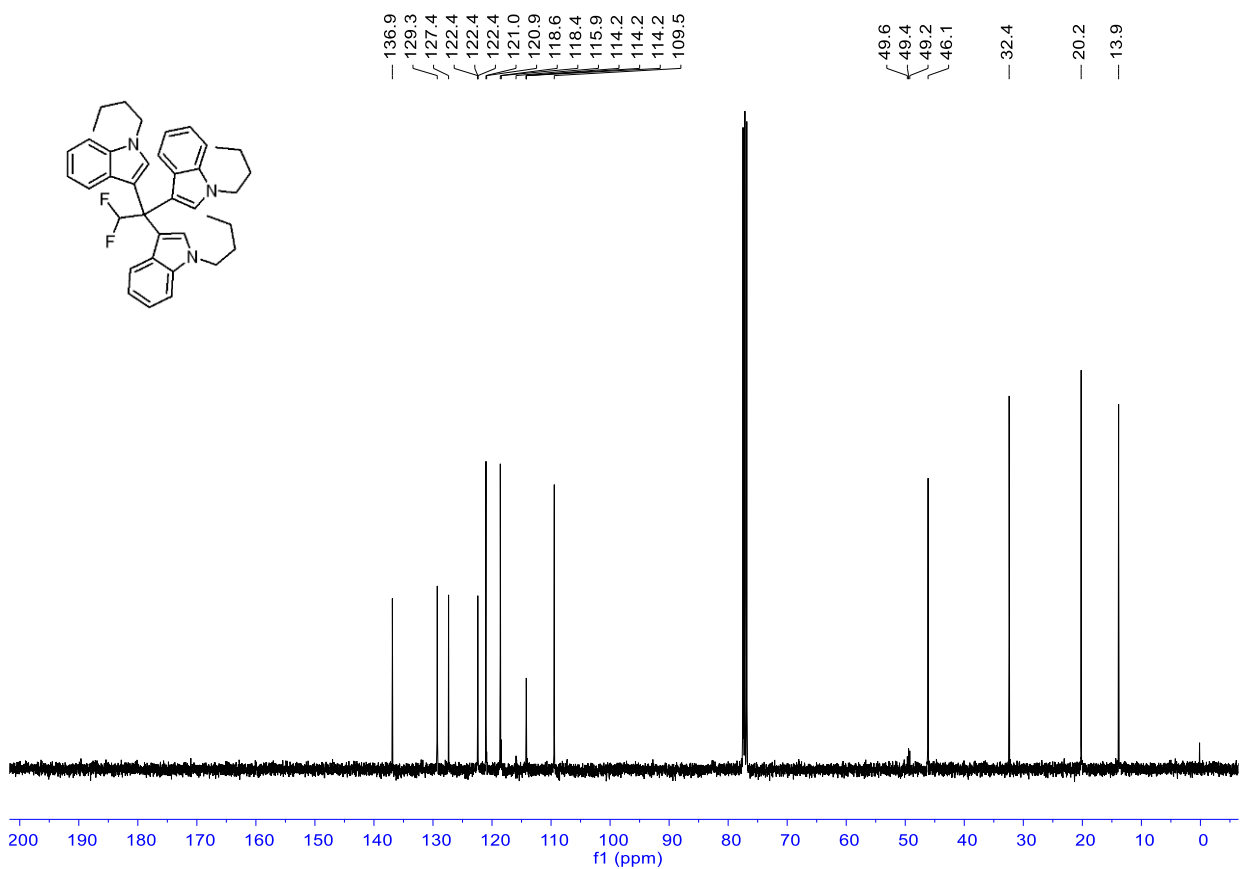

$^{13}\text{C}\{^1\text{H}\}$  NMR spectrum of **3d**

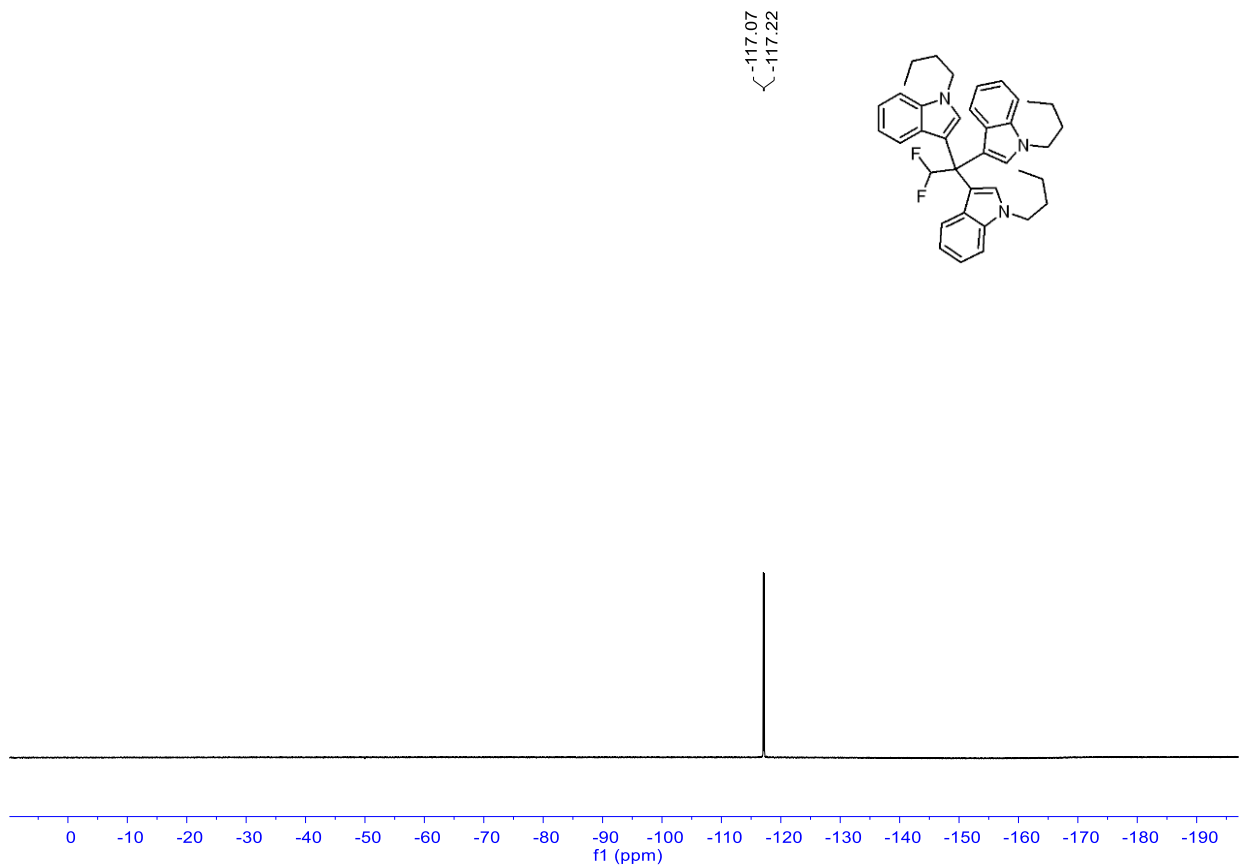

$^{19}\text{F}$  NMR spectrum of **3d**

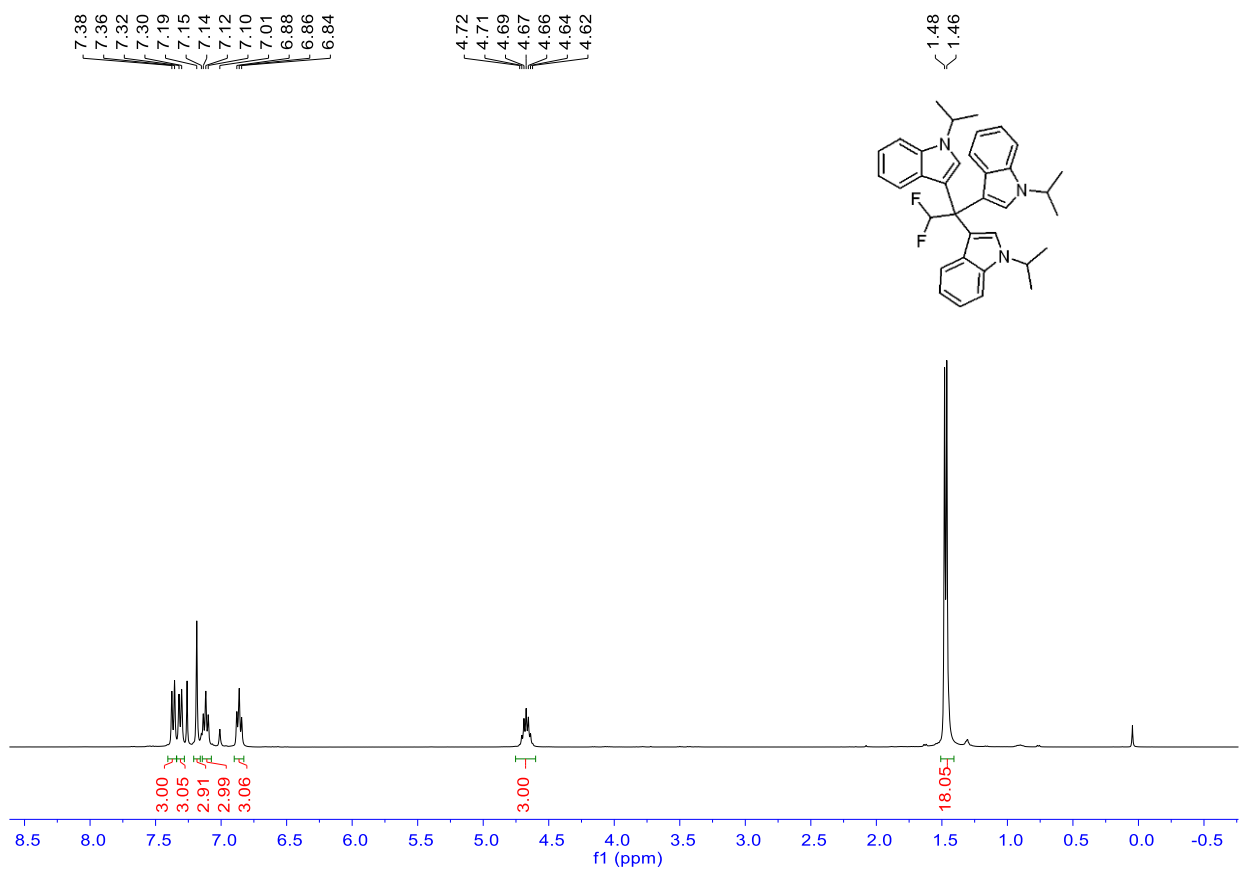

<sup>1</sup>H NMR spectrum of **3e**

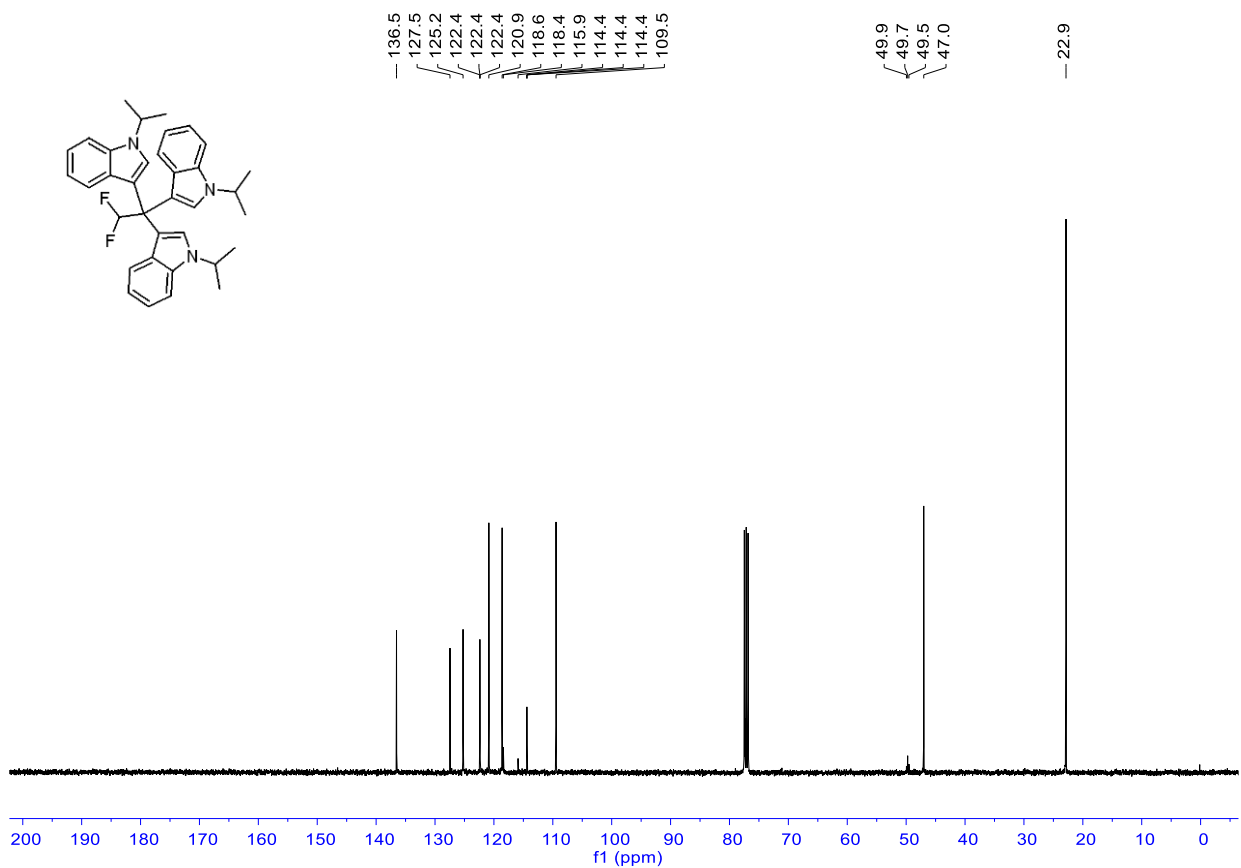

<sup>13</sup>C{<sup>1</sup>H} NMR spectrum of **3e**

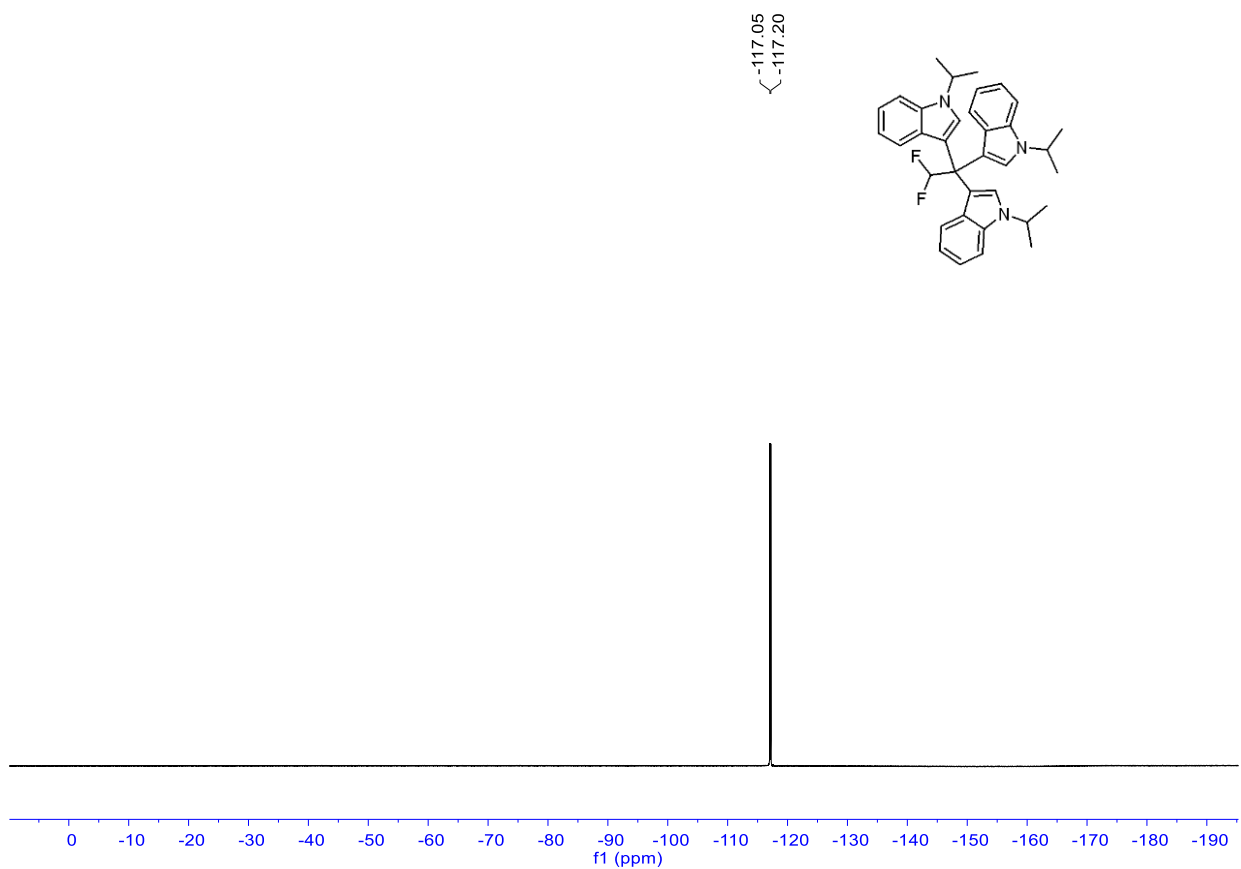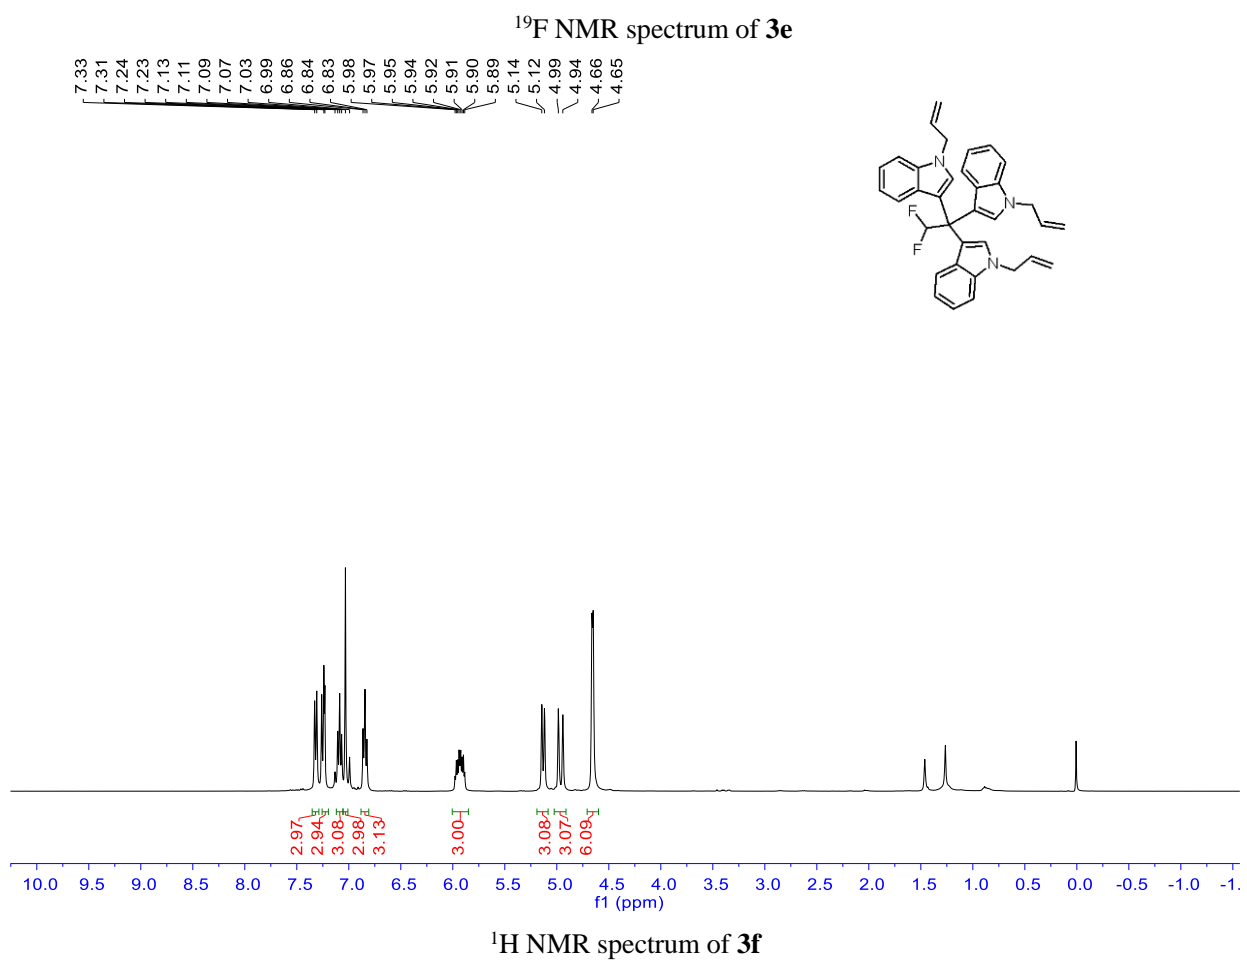

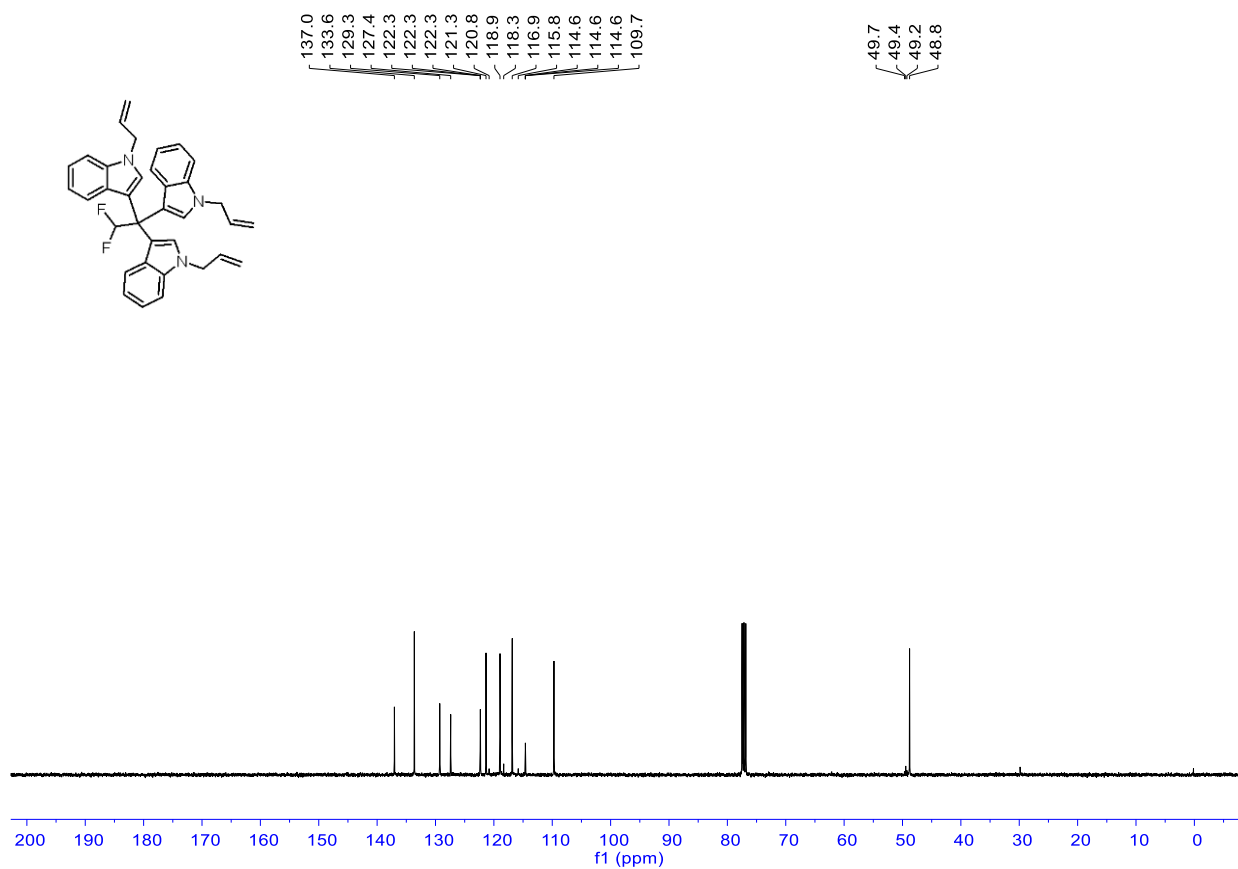

$^{13}\text{C}\{^1\text{H}\}$  NMR spectrum of **3f**

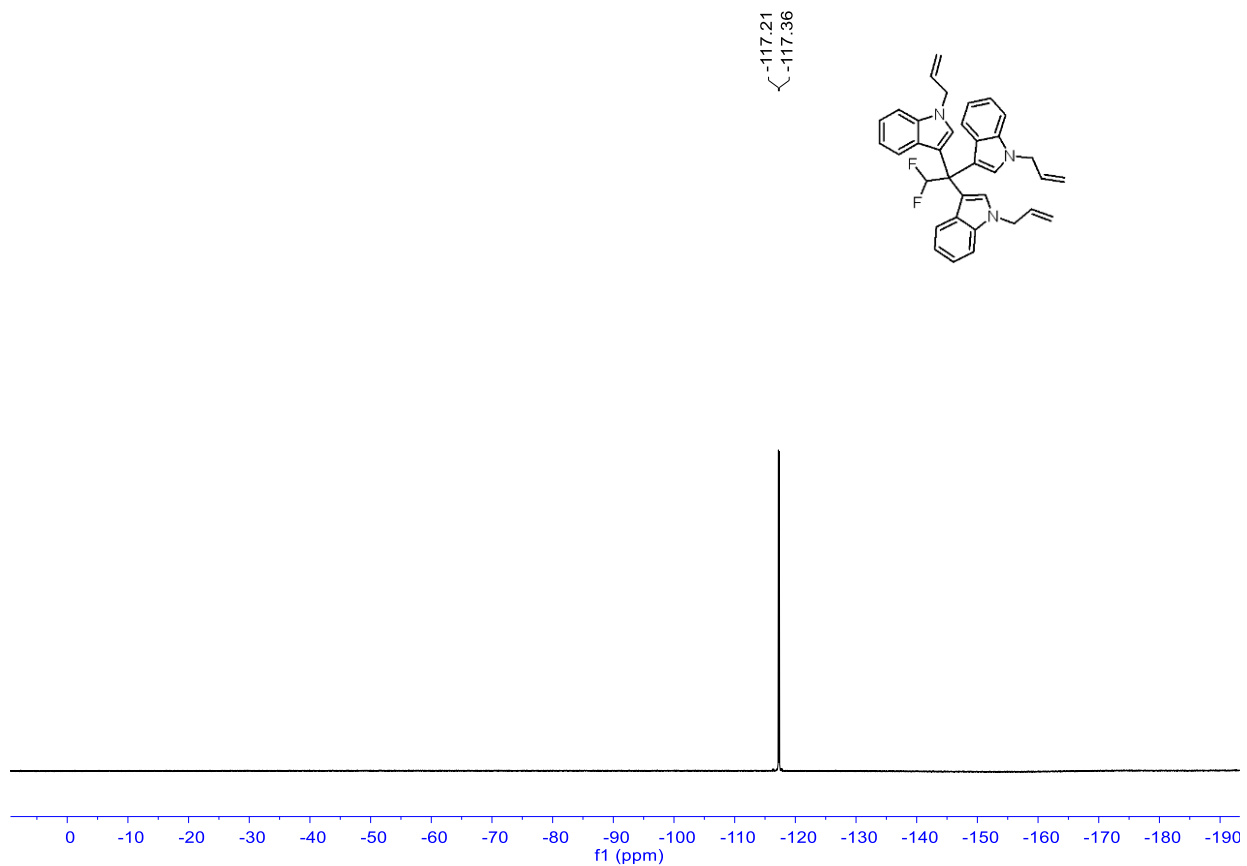

$^{19}\text{F}$  NMR spectrum of **3f**



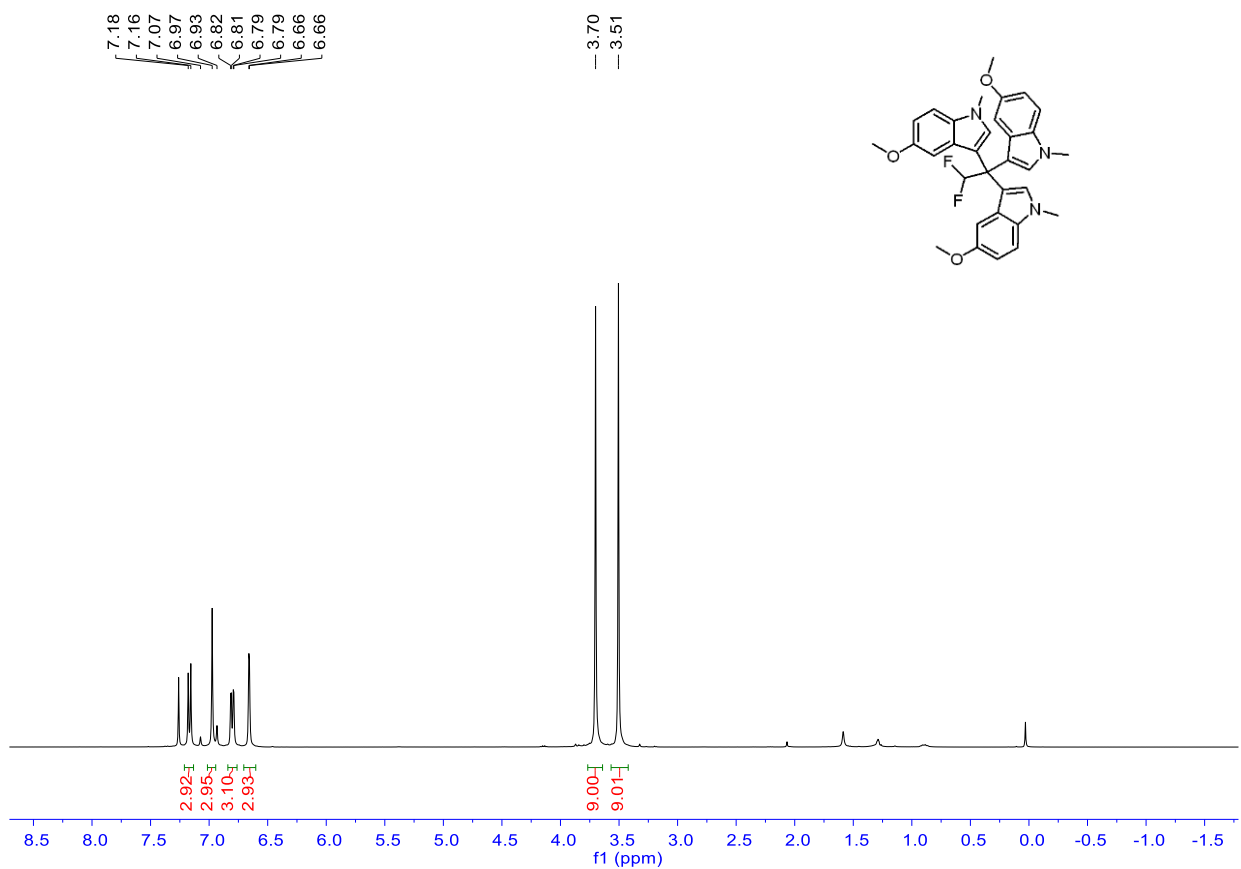

$^1\text{H}$  NMR spectrum of **3g**

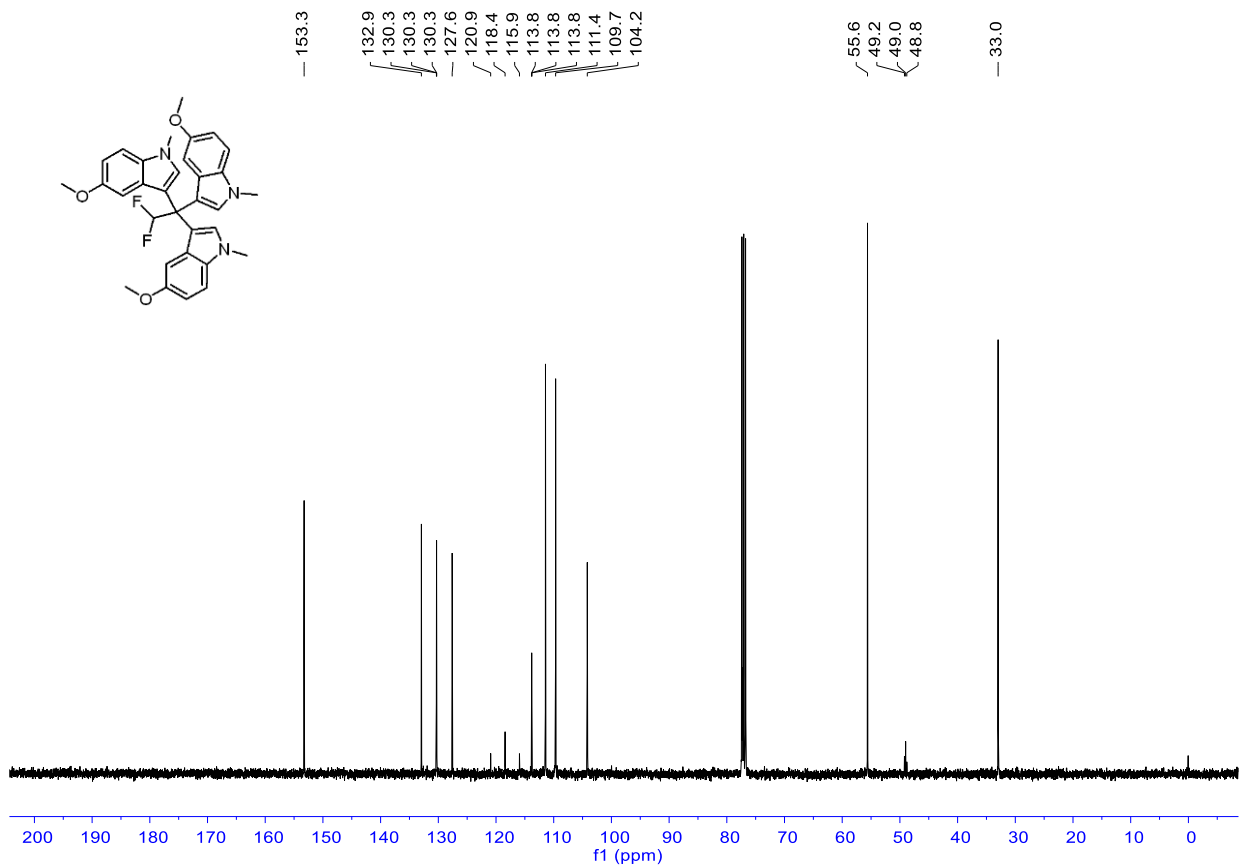

$^{13}\text{C}\{^1\text{H}\}$  NMR spectrum of **3g**

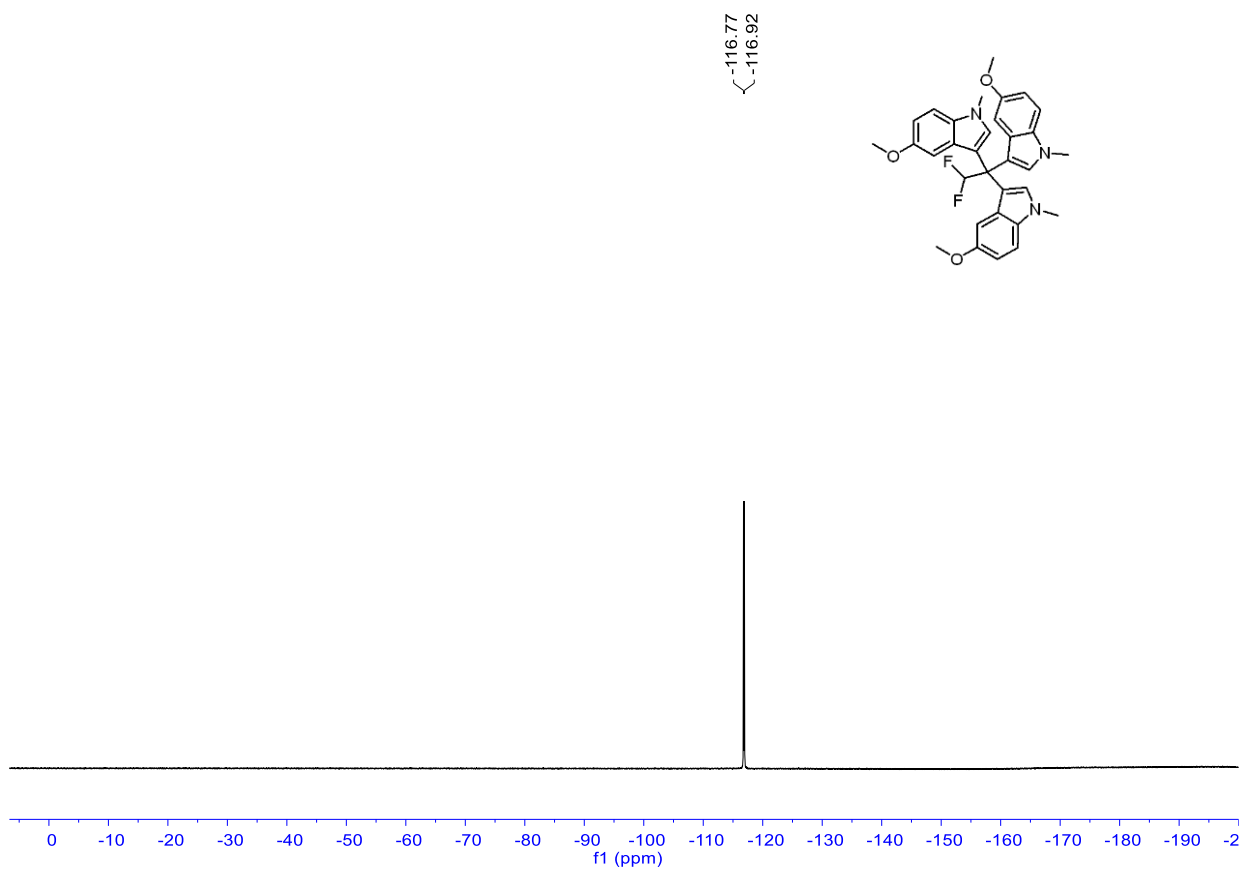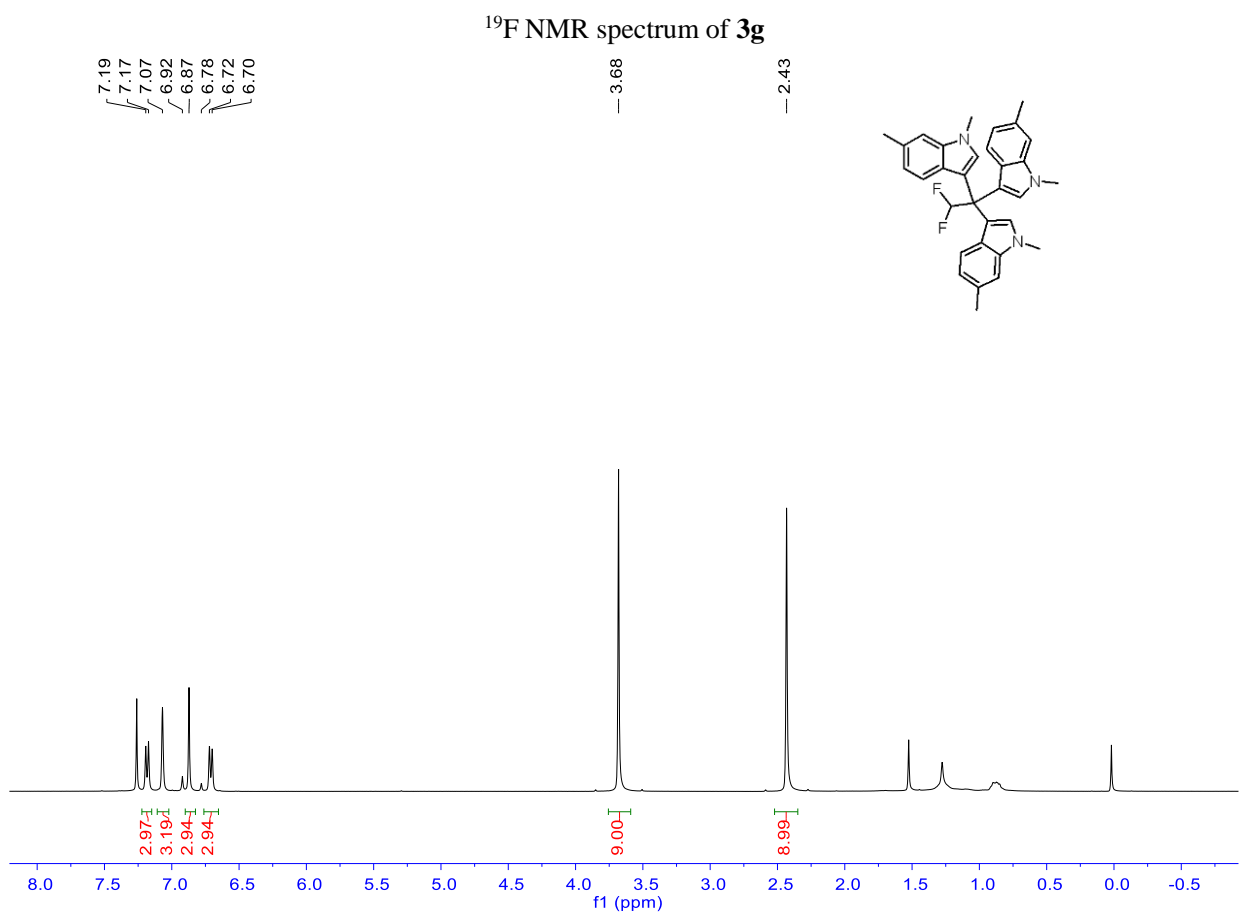

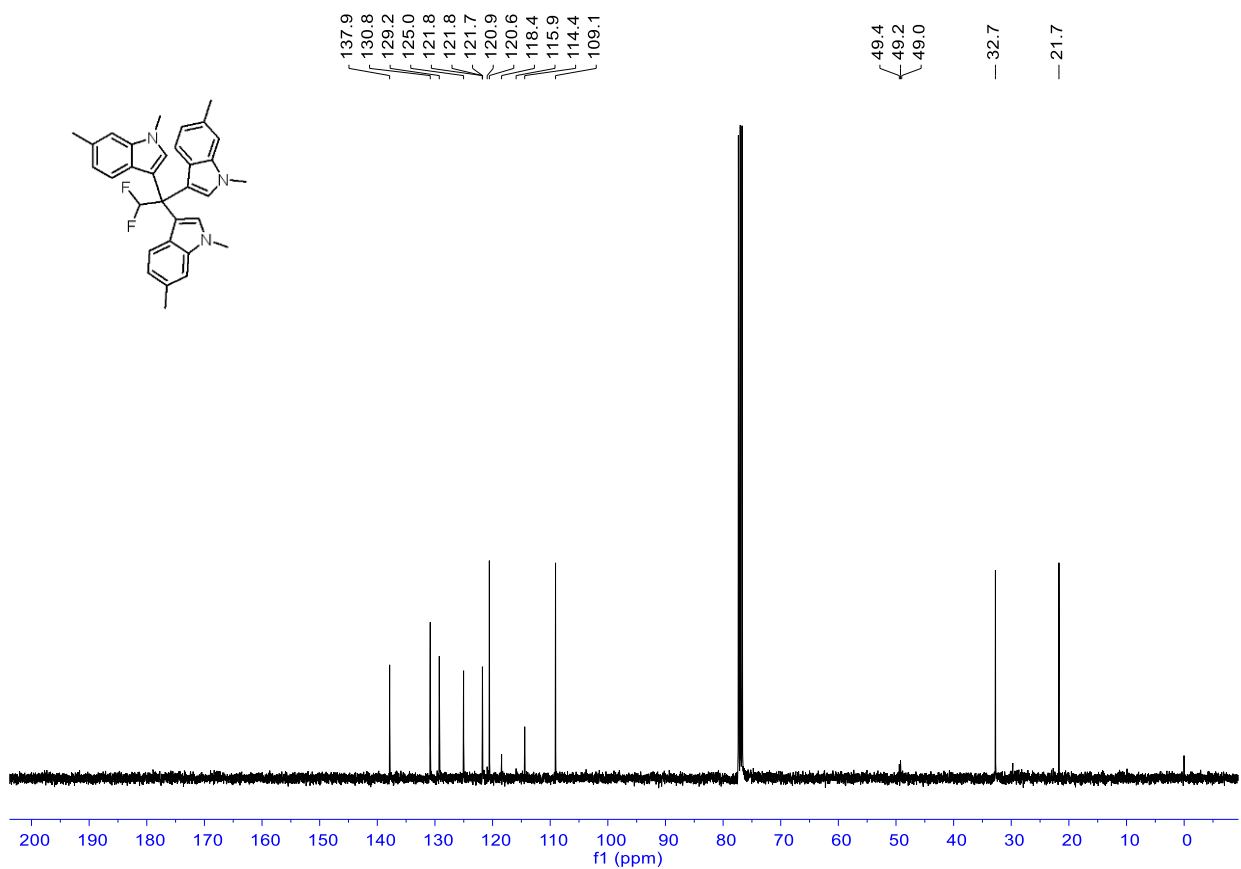

$^{13}\text{C}\{^1\text{H}\}$  NMR spectrum of **3h**

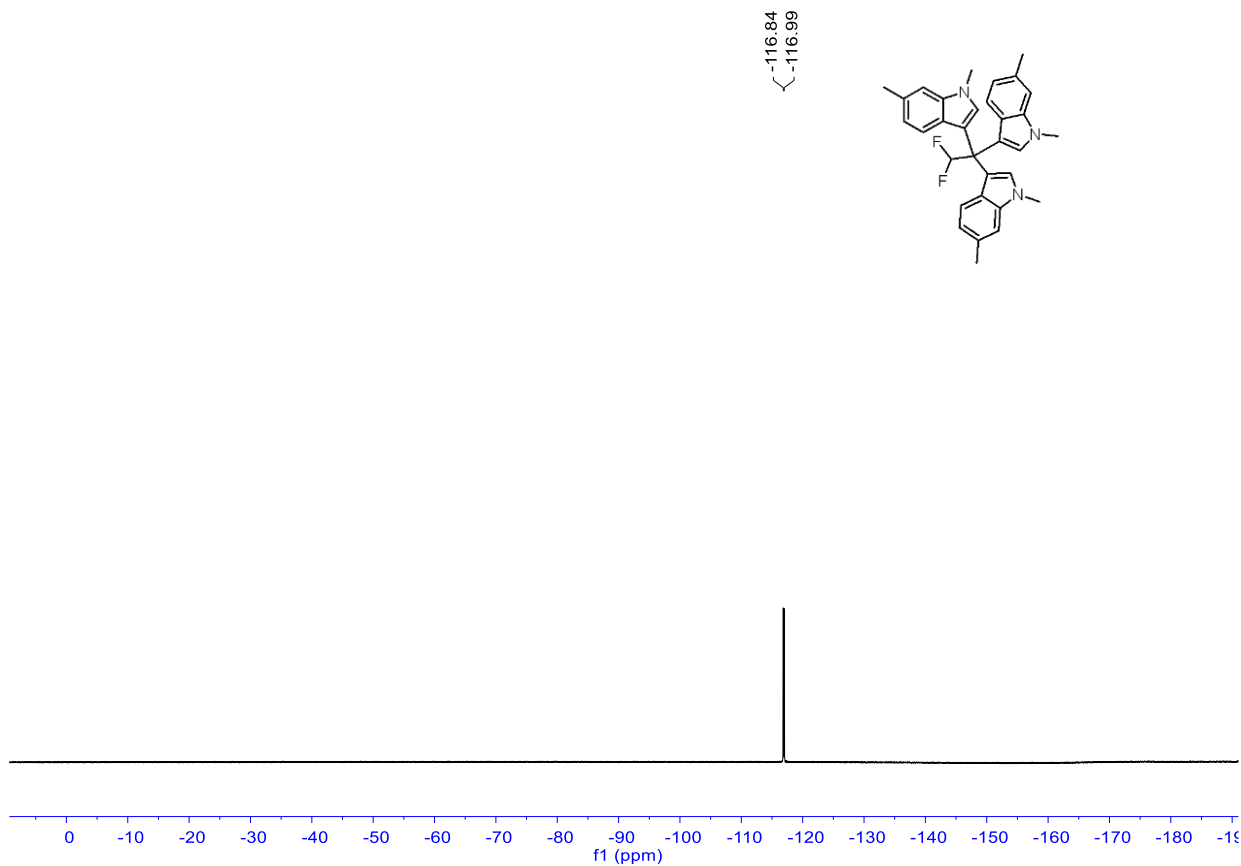

$^{19}\text{F}$  NMR spectrum of **3h**

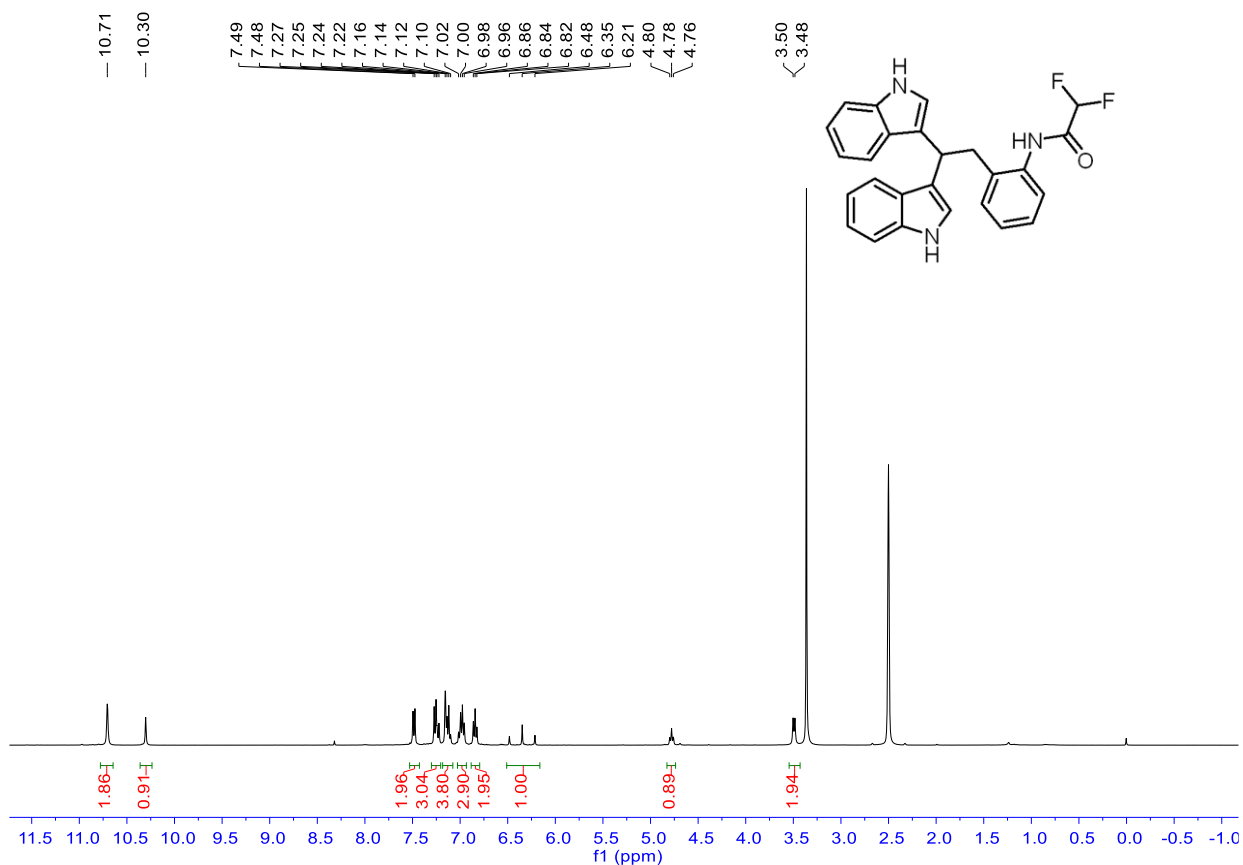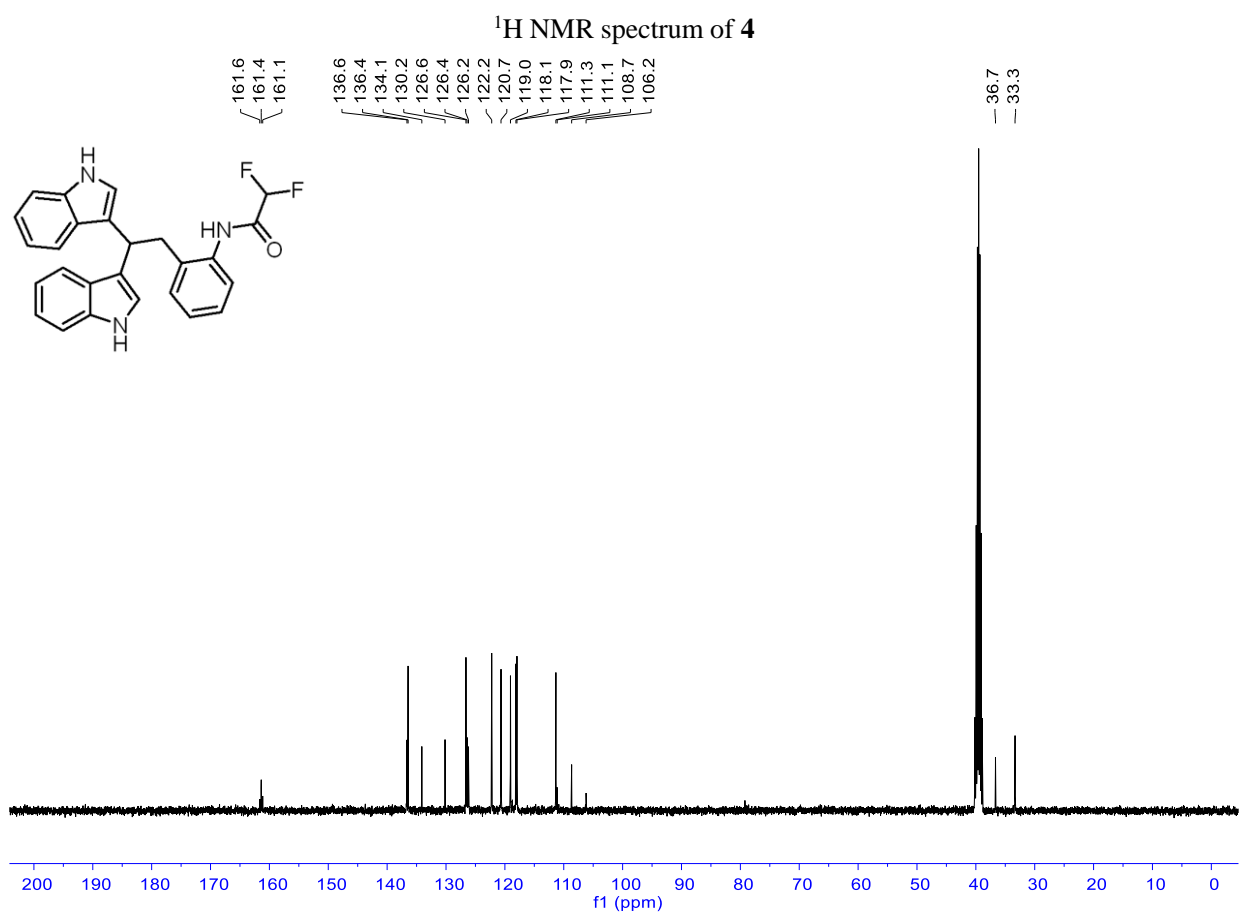

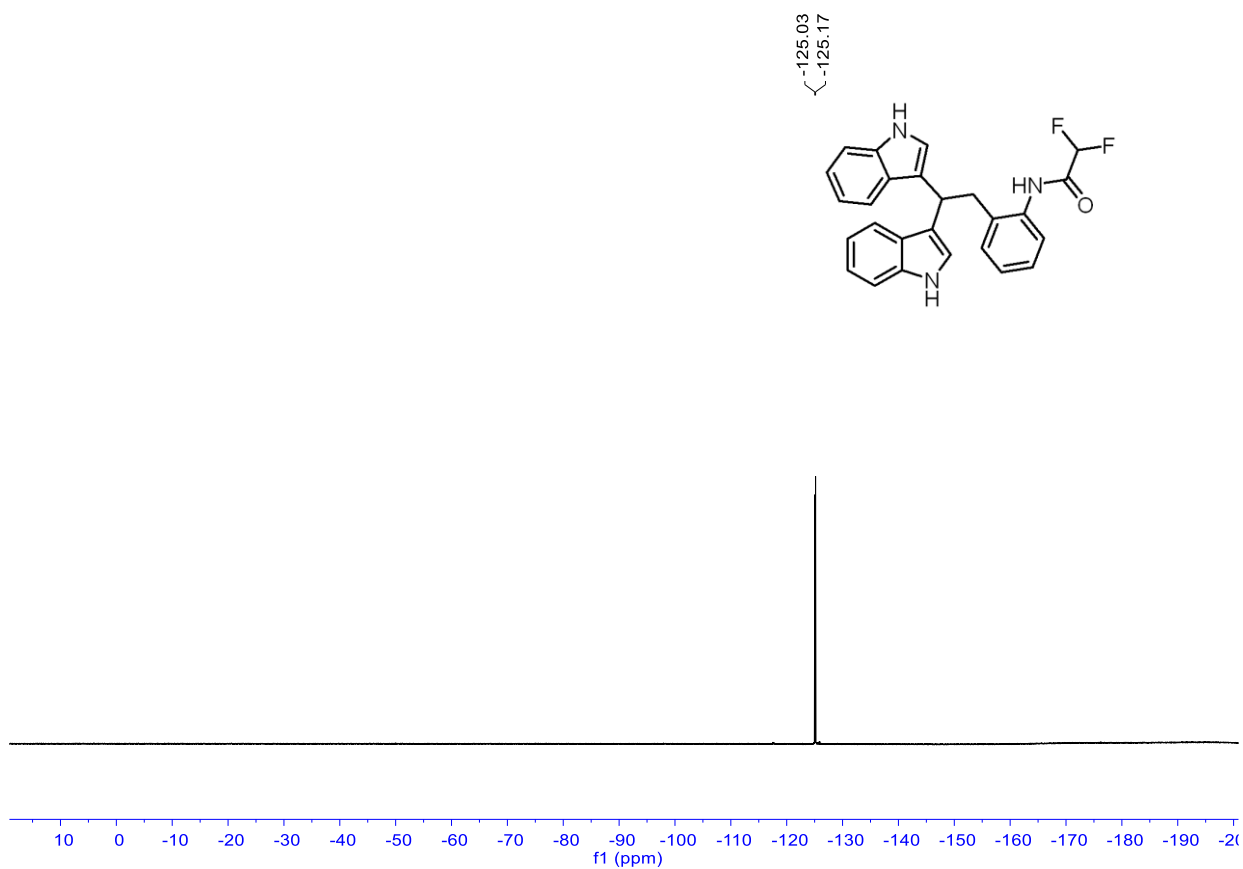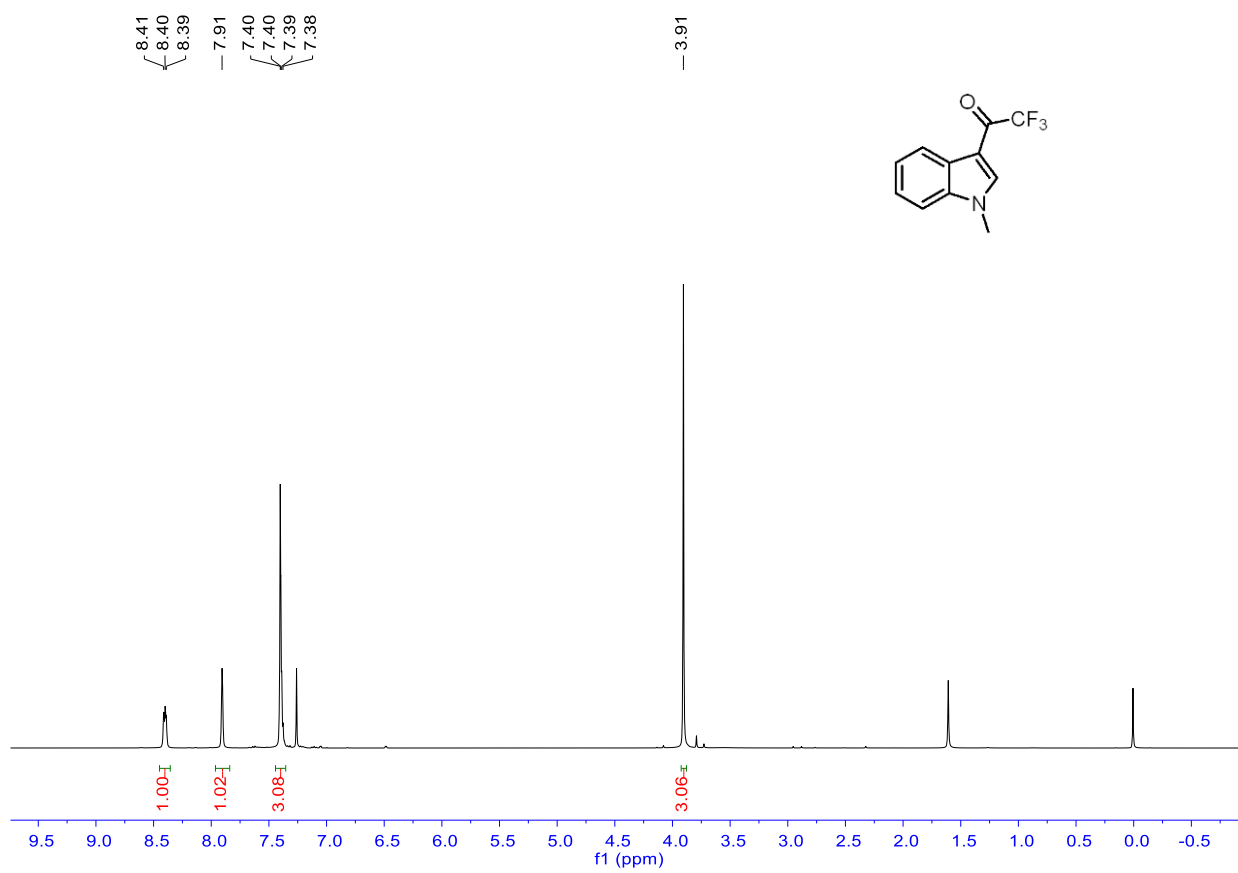

Supplement: d2ob02241a1.pdf [file d2ob02241a1.pdf]
